# Supplementary material for: Cross-sectional analysis of two social determinants of health in California cities: racial/ethnic and geographic disparities
Source: PubMed Central journal article supplement — BMJ Open. 2017 Jun 6;7(5):e013975. doi: 10.1136/bmjopen-2016-013975 (PMC5730014; doi:10.1136/bmjopen-2016-013975), 2017-06-06
Supplement: bmjopen-2016-013975.draft_revisions.pdf [file bmjopen-2016-013975.draft_revisions.pdf]

# BMJ Open

## Surveillance of the Social Determinants of Health in California Communities: Racial, Ethnic, and Geographic Disparities

|                                 |                                                                                          |
|---------------------------------|------------------------------------------------------------------------------------------|
| Journal:                        | <i>BMJ Open</i>                                                                          |
| Manuscript ID                   | bmjopen-2016-013975                                                                      |
| Article Type:                   | Research                                                                                 |
| Date Submitted by the Author:   | 21-Aug-2016                                                                              |
| Complete List of Authors:       | Bustamante, Dulce<br>Maizlish, Neil                                                      |
| <b>Primary Subject Heading</b>: | Public health                                                                            |
| Secondary Subject Heading:      | Epidemiology                                                                             |
| Keywords:                       | EPIDEMIOLOGY, PUBLIC HEALTH, Health policy < HEALTH SERVICES ADMINISTRATION & MANAGEMENT |
|                                 |                                                                                          |

SCHOLARONE™  
Manuscripts

1  
2  
3  
4  
5  
6  
7  
8  
9 Title: **Surveillance of the Social Determinants of Health in California**  
10 **Communities: Racial, Ethnic, and Geographic Disparities**  
11

12  
13  
14  
15  
16 Authors: Dulce Bustamante-Zamora, PhD  
17 1126 Cherry Ave #56, San Bruno, California, 94066, USA  
18 [dulce\\_mariab@hotmail.com](mailto:dulce_mariab@hotmail.com)  
19 Tel. (650) 730-0329  
20

21 Corresponding Author: Neil Maizlish, PhD, MPH  
22 1226 Carlotta Ave, Berkeley, California, 94707, USA  
23 [neil3971@comcast.net](mailto:neil3971@comcast.net)  
24 Tel. (510) 525-4939  
25  
26  
27  
28

29 Key Words: health inequity, health disparity, poverty, educational attainment, race/ethnicity,  
30 neighbourhood  
31

32  
33 Word Count: 3,112  
34  
35  
36  
37  
38  
39  
40  
41  
42  
43  
44  
45  
46  
47  
48  
49  
50  
51  
52  
53  
54  
55  
56  
57  
58  
59  
60

## ABSTRACT

### Objective

To study the magnitude and direction of city level racial and ethnic differences in poverty and education to examine health equity and social determinants of health in California communities.

### Design

We used data from the American Community Survey, United States Census Bureau, 2006-2010, and calculated differences in the prevalence of poverty and low educational attainment in adults by race/ethnicity and by census tracts within California cities. For race/ethnicity comparisons, when the referent group ( $p_2$ ) to calculate the difference ( $p_1 - p_2$ ) was the non-Hispanic White population (considered a historically advantaged group), a positive difference was considered a health inequity. Differences with a non-White reference group were considered health disparities.

### Setting

Cities and towns of the State of California, United States.

### Results

Within-city differences in the prevalence of poverty and low educational attainment disfavored Black and Latinos compared to Whites in over 78% of cities. Compared to Whites, the median within-city poverty difference was 7.0% for Latinos and 6.2% for Blacks. For education, median within-city difference was 26.6% for Latinos compared to Whites. In a small, but not negligible proportion of cities, historically disadvantaged race/ethnicity groups had better social determinants of health outcomes than Whites. The median difference between the highest and lowest census tracts within cities was 14.3% for poverty and 15.7% for low educational attainment. Overall city poverty rate was weakly, but positively correlated with within-city racial/ethnic differences.

## Conclusions

Disparities and inequities are widespread in California. Local health departments can partner with cities in their jurisdiction on strategies to reduce racial, ethnic and geographic differences in economic and educational outcomes.

For peer review only

## ARTICLE SUMMARY

### STRENGTHS AND LIMITATIONS OF THIS STUDY

- To our knowledge, this is the first comprehensive tabulation of pairwise within-city SDOH differences between major race/ethnic groups and neighbourhoods across California's cities.
- Most multi-level, place-based research, examines individual and neighborhood impacts, but often bypasses city as a "place": racial and ethnic differences in health outcomes and their social determinants are widely reported in the United States at the national, state, and county scale, with non-Hispanic White populations usually experiencing the best outcomes.
- This article fills a geographic gap in current public health surveillance by documenting the glaring disparities in poverty and low educational attainment by race/ethnicity and neighborhood that exist within nearly every California city.
- Examination of the geographical extent and magnitude of disparities in the social determinants is essential to engage local government in "health in all policies" and collaborations with public health agencies.
- As a univariate analysis, our findings have several limitations including lack of examination of other social determinants that could mediate the outcomes, timeperiod of the study that coincides with high levels of economic instability during the Great Recession, 2007-2009, and use of aggregated data that masks the heterogeneity of Asian and other sub-populations.

## INTRODUCTION

Differences in health outcomes or their determinants are widely reported between racial and ethnic groups in the United States at the national, state, and county scale.<sup>1-3</sup>

Differences that are avoidable, unfair and rooted in historical social disadvantage are defined as health inequities. Differences with biological or other underlying causes are health disparities.<sup>4</sup> County and city local health departments (LHDs) increasingly recognise their role in addressing the social determinants of health (SDOH) that underlie health inequities. LHDs are also reaching out to non-health sectors in their communities to impact the root causes of health inequities through "Health in All Policies".<sup>5</sup>

Geographic analysis of SDOH is used to reveal health inequities, and prioritise public health interventions and target community engagement. While an increasing number of LHDs examine health inequities at small geographies, most rely on county level data that masks important differences within counties. The surveillance of SDOH at small geographies poses methodological challenges and opportunities for taking data to action. In assessing racial and ethnic inequities, non-Hispanic Whites are often considered the socially advantaged referent group. It has been posited that it is relatively rare for the most privileged group not to have the best outcome.<sup>4, p187</sup>

We explore racial, ethnic, and geographic differences in poverty and low educational attainment. Poverty reduction, increasing educational attainment, and the elimination of health disparities are national health goals of the United States<sup>6</sup>; these two SDOH may account for 18% of the national burden of mortality.<sup>7</sup>

We examined 1) the magnitude and direction of racial, ethnic and geographical differences in these SDOH within and between California cities, 2) the relationship between overall community disadvantage and health inequities, and 3) possible actions that LHDs may consider based on surveillance findings.

## METHODS

### Data Source

We used data from the American Community Survey (ACS),<sup>8 9</sup> a continuous prevalence survey based on a probability sample of households throughout the United States. ACS publishes data in 5-year tabulations for cities and census tracts. We used ACS Selected Population Tables (2006-2010), which stratify the tabulations by mutually exclusive race and ethnicity categories: Hispanic or Latino, and non-Hispanic persons of the following races: White, Black, Asian, Native Hawaiian and Other Pacific Islander, Other, Multiple, and American Indian/Alaskan Native. For California, the ACS reported on 8,057 census tracts, 480 incorporated cities, and 1,043 non-incorporated places. The prevalence of poverty and its standard error were obtained from ACS Table DP03, and educational attainment in adults and its standard error were obtained from Table DP02. The California Department of Public Health compiled these data ([www.cdph.ca.gov/programs/pages/healthycommunityindicators.aspx](http://www.cdph.ca.gov/programs/pages/healthycommunityindicators.aspx)).

### ACS Definition of Poverty and Educational Attainment

The prevalence of poverty was defined as the 5-year annual average percentage of all individuals whose household income in the past 12 months was below the federal poverty level. Total household income was calculated from eight questions on the ACS-1 form about wages, self-employment, securities, rental property, retirement and disability payments, and public assistance. Households were classified as poor when total income of the householder's family was below an income threshold, taking into account the size of the family, number of related children, and, for 1- and 2-person families, age of householder.<sup>8</sup> The prevalence of educational attainment less than high school was defined as the 5-year annual average percentage of adults aged 25 years or older whose maximum educational attainment was 0 to 11 years of grade school.

## Between-City, Within-City, and Neighbourhood Level Racial and Ethnic Disparities and Inequities and Statistical Methods

We calculated between-city, within-city, and neighbourhood level differences for combinations of White, Asian, Latino, and Black subgroups.

Differences in the 5-year percentage of poverty or low educational attainment,  $p$ , were calculated between pairs of racial/ethnic groups,  $p_1 - p_2$ . Differences have a positive or negative sign based on the referent group ( $p_2$ ). When the referent group,  $p_2$ , was White, a positive difference represents a health inequity. Differences with a non-White reference group were considered health disparities. For cities with two or more census tracts, neighbourhood disparities were defined as the absolute difference of census tracts with the highest and lowest 5-year percentage.

Mean and medians of between- and within-city differences and their standard deviation were calculated. The between-city mean difference was defined as the difference of the mean prevalence of two specified race/ethnicity groups across all cities:

$$\text{Between - city mean difference} = \frac{\sum_{i,j} p_{i,j}}{N_{\text{Total}(j)}} - \frac{\sum_{i,k} p_{i+1,k}}{N_{\text{Total}(k)}}$$

where  $i$  is the  $i^{\text{th}}$  race/ethnicity group and  $j$  is the  $j^{\text{th}}$  of  $N$  total cities of group  $i$ , and  $k$  is the  $k^{\text{th}}$  of  $N$  total cities of group  $i+1$ .

The within-city mean difference was defined as:

$$\text{Within - city mean difference} = \frac{\sum_{i,j} (p_{i,j} - p_{i+1,j})}{N_{\text{Total}(j)}}$$

where  $i$  is the  $i^{\text{th}}$  race/ethnicity group and  $j$  is the  $j^{\text{th}}$  of city of  $N_{\text{Total}}$  cities where data on both of the race/ethnicity pairs are available.

Within-city differences were plotted as cumulative frequency distributions of cities for each pairwise race/ethnicity comparison in order to assess the magnitude and direction



1  
2  
3 of racial and ethnic inequities or disparities in cities across the state. For each city, Z-  
4 tests were carried out to determine whether the within-city difference was statistically  
5 significant. We followed U.S. Census Bureau guidelines for pooling standard errors of  
6 percents, which is the square root of the sum of the squares of the two individual  
7 standard errors ( $se = \sqrt{se_1^2 + se_2^2}$ ). A p value of 0.10 was considered statistically  
8 significant. R software was used for the calculations.<sup>10</sup>  
9  
10  
11  
12  
13

14  
15  
16 SDOH differences are often interpreted in the context of the range of their absolute  
17 values. For example, in some very poor communities there may be no demonstrable  
18 differences between groups and "everyone is poor together". In other communities,  
19 there is a small, but statistically significant difference between groups, but each group  
20 is relatively well off (e.g., has a SDOH value far above the mean.) To contextualise a  
21 city's disparities or inequities on a backdrop of high or low rate of poverty or educational  
22 attainment, we plotted within-city disparities or inequities, as a function of the between-  
23 city poverty rate (or educational attainment). Simple linear correlation (Pearson, r)  
24 assessed the strength of association.  
25  
26  
27  
28  
29  
30  
31  
32  
33

### 34 **Calculation of Neighbourhood Disparities**

35  
36

37 Census tract and city boundaries are not always congruent; therefore, for  
38 neighbourhood analyses, census tracts were associated with the city into which its  
39 centroid fell. We used ArcGIS 10.3 (ESRI, Redlands, CA) to calculate and associate  
40 centroids with cities. In some cases, portions of census tracts outside of city limits were  
41 included in neighbourhood comparisons. This introduces some potential  
42 misclassification if the outlying portion of the census tract has different poverty or  
43 educational attainment. We also calculated the mean linear distance in miles between  
44 the centroids of the census tracts with the highest and lowest poverty and educational  
45 outcomes.  
46  
47  
48  
49  
50  
51  
52  
53  
54  
55  
56  
57  
58  
59  
60

## Exclusions

The ACS does not publish data for geographic areas with fewer than 50 respondents. Of 1,523 cities the number available for within-city pairwise comparisons varied by race/ethnicity subgroup: 221 cities had data for Black-Asian comparisons, 280 for Asian-White, 245 for Black-White, 364 for Latino-Asian, 252 for Latino-Black, and 611 for Latino-White. We did not have sufficient data to carry out pairwise comparisons that included American Indian/Native Alaskans, Native Hawaiians and Other Pacific Islanders, Multiple races, and Other. Analyses of poverty at the census tract level excluded economically dependent populations in colleges, correctional facilities, and other group quarters and institutions. Two census tracts with a population less than 500 inhabitants was also excluded.

## RESULTS

### Between- and Within-City Racial and Ethnic Disparities and Inequities

The poverty rate of Latinos (18.6%) and Blacks (17.4%) averaged over California cities was nearly twice that of Whites (9.2%) and Asians (9.5%) (table 1).

**Table 1** Between and Within-City Means and Race-Ethnicity Specific Pairwise Differences in Poverty Rate and Educational Attainment, California, 2006-2010

|                                                        | Percent below the federal poverty level |        |             | Percent of adults aged $\geq 25$ years without a high school education |              |        |             |        |
|--------------------------------------------------------|-----------------------------------------|--------|-------------|------------------------------------------------------------------------|--------------|--------|-------------|--------|
|                                                        | Mean                                    | SD     | Median      | Mean                                                                   | SD           | Median |             |        |
| Between cities                                         |                                         |        |             |                                                                        |              |        |             |        |
| White                                                  | 9.2                                     | 6.9    | 7.5         | 8.7                                                                    | 7.3          | 6.7    |             |        |
| Black                                                  | 17.4                                    | 12.9   | 14.6        | 11.0                                                                   | 8.9          | 8.8    |             |        |
| Asian                                                  | 9.5                                     | 8.7    | 7.1         | 12.4                                                                   | 9.8          | 9.7    |             |        |
| Latino                                                 | 18.6                                    | 11.4   | 16.8        | 39.6                                                                   | 18.4         | 39.9   |             |        |
| Pairwise differences (p <sub>1</sub> -p <sub>2</sub> ) | Between city                            |        | Within city |                                                                        | Between city |        | Within city |        |
|                                                        | Mean                                    | Median | Mean        | Median                                                                 | Mean         | Median | Mean        | Median |
| Black-White                                            | 8.2                                     | 7.1    | 8.5         | 6.2                                                                    | 2.3          | 2.1    | 2.0         | 0.6    |
| Asian-White                                            | 0.3                                     | -0.4   | 1.7         | 0.9                                                                    | 3.7          | 3.0    | 4.4         | 2.7    |
| Latino-White                                           | 9.4                                     | 9.3    | 7.6         | 7.0                                                                    | 30.9         | 33.2   | 26.2        | 26.6   |
| Black-Asian                                            | 7.9                                     | 7.5    | 6.5         | 4.8                                                                    | -1.4         | -0.9   | -3.3        | -3.1   |
| Latino-Asian                                           | 9.1                                     | 9.7    | 5.1         | 4.8                                                                    | 27.2         | 30.2   | 19.0        | 19.2   |
| Latino-Black                                           | 1.2                                     | 2.2    | 0.3         | 0.5                                                                    | 28.6         | 31.1   | 24.9        | 25.4   |

DRAFT

CONFIDENTIAL

11

1  
2  
3 The city average percentage of adults with low educational attainment was 3-4 times  
4 higher in Latinos compared to Whites, Asians, or Blacks. The largest mean between-  
5 city educational inequity (30.9%) was between Latinos and Whites.  
6  
7  
8  
9

10 The distribution of within-city differences of race/ethnicity pairs is presented for poverty  
11 and low educational attainment (Figure 1). In a large percentage of cities, Asians and  
12 Whites had better poverty outcomes than Latinos or Blacks. The largest inequities  
13 occurred between Blacks and Whites (8.5% mean difference) and Latinos and Whites  
14 (7.6%). In approximately 40% of cities, these differences were statistically significant.  
15 Latinos had better poverty outcomes than Asians or Whites in 26% and 18% of cities,  
16 respectively. Likewise, Blacks had better outcomes than Asians or Whites in  
17 approximately 20% of cities. The average differences in within-city poverty rates  
18 between Blacks and Latinos were small (0.3%), but there was considerable variation.  
19  
20  
21  
22  
23  
24  
25  
26  
27

28 For low educational attainment (Figure 1 b), the largest mean difference was between  
29 Latinos and other groups (Latino-Whites, 26.2%; Latino-Blacks, 24.9%; Latino-Asians,  
30 19.0%). Whites tended to have better outcomes than Asians or Blacks. Blacks tended to  
31 have better outcomes than Asians. Latinos had poorer outcomes than the other groups  
32 in almost all cities (94% or higher). An overwhelming majority of within-city differences  
33 between Latinos and other groups were statistically significant.  
34  
35  
36  
37  
38  
39

40 Supplemental materials include maps of California cities depicting the race/ethnicity with  
41 the largest disparity for poverty or educational attainment.  
42  
43  
44

### 45 **Between- and Within-City Racial and Ethnicity Correlations**

46  
47

48 Within-city racial/ethnic differences in poverty and overall city poverty rate (Figure 2 a),  
49 appear to be correlated for all race/ethnicity combinations with White or Asian referents,  
50 but exhibit considerable variability (scatter). Black and Latino inequities (White  
51 referents) tended to be larger at higher levels of overall poverty ( $r = 0.37$ ,  $P < 0.01$ ). A  
52  
53  
54  
55  
56  
57  
58  
59  
60

DRAFT

CONFIDENTIAL

12

1  
2  
3 weaker association ( $r = 0.20$ ,  $P < 0.01$ ) was observed for Black or Latinos with Asian  
4 referents.  
5  
6

7  
8  
9 In a large proportion of California cities, Latinos experience both large educational  
10 disparities and live in cities with low overall educational attainment. Within-city  
11 education differences between Latinos and other groups were strongly associated ( $r$   
12 range: 0.48 to 0.60) with overall city low educational attainment (Figure 2 b).  
13  
14  
15

### 16 17 **Neighbourhood Disparities** 18

19  
20  
21 The distribution of within-city differences of poverty and educational attainment between  
22 the highest and lowest census tract is presented in Figure 3. The median difference was  
23 14.3% for poverty and 15.7% for educational attainment. Disparities of 25% or greater  
24 were observed in 25% of cities for poverty and 33% of cities for educational attainment.  
25  
26 In approximately 73% of 500 cities with two or more census tracts, the differences were  
27 statistically significant. For the 174 cities with 10 or more census tracts, 99% of  
28 differences were statistically significant. The median straight-line distance between the  
29 highest and lowest census tracts was 2.6 km (SD, 3.2) for poverty and 2.9 km (SD,  
30 3.04) for educational attainment.  
31  
32  
33  
34  
35  
36  
37  
38  
39  
40  
41  
42  
43  
44  
45  
46  
47  
48  
49  
50  
51  
52  
53  
54  
55  
56  
57  
58  
59  
60

DRAFT

CONFIDENTIAL

13

## DISCUSSION

We found widespread racial, ethnic, and geographic differences in educational attainment and poverty within California cities. Comparisons between Whites and Blacks and Whites and Latinos generally conformed to a health inequities model – that historically, socially disadvantaged groups had poorer outcomes than Whites. This was less frequent in comparisons between Asians and Whites. In a small, but not negligible proportion of cities, historically disadvantaged race/ethnicity groups had better SDOH outcomes than Whites. We found a correlation between a community's underlying level of poverty (or educational attainment) and racial/ethnic disparities. Neighbourhood level differences within cities were also ubiquitous. On average, a mere 2.6 km separates a city's census tracts with the highest and lowest poverty rate or educational attainment.

### Strengths and Limitations

To our knowledge, this is the first comprehensive tabulation of pairwise within-city SDOH differences between major race/ethnic groups and neighbourhoods across California's cities.

As a univariate analysis, our findings have several limitations. Racial/ethnic differences may be related other SDOHs which mediate the outcome. For example, recency of immigration profoundly influences poverty and educational attainment, and may explain, in part, the educational inequities we observed in Latinos and Whites. Moreover, SDOH are themselves interrelated. Conducting a multivariate analysis to establish the independence of racial/ethnicity disparities<sup>4</sup>, is not feasible using pre-tabulated ACS tables. Other U.S. Census Bureau products (Public Use Microdata Sample) and surveys may serve this purpose, but do not provide reliable estimates at small geographies.

For a small percentage of cities, socially disadvantaged groups had significantly better outcomes than Whites. Further research of these cities may reveal whether this finding

DRAFT

CONFIDENTIAL

14

1  
2  
3 is associated with community "resiliency", confounded by other sociodemographic  
4 factors, or has another explanation.  
5  
6  
7

8  
9 The Asian category includes subpopulations whose poverty and educational attainment  
10 are heterogeneous. Valuable information may have been lost by aggregation.  
11

12  
13 Differences in SDOH between geographic units such as census tracts may be  
14 disparities or inequities, depending on the history of social disadvantage. Long-standing  
15 patterns of racial discrimination and economic segregation within California cities<sup>11</sup>  
16 undoubtedly underlie some of the differences that we labeled disparities.  
17  
18  
19  
20

21  
22 Data suppression in the ACS impacts numerically small, geographically dispersed  
23 racial/ethnic populations, creating information bias towards areas with greater racial  
24 concentration or segregation. Small rural communities account for a disproportionate  
25 number of exclusions in our analysis. Nonetheless, depending on the race/ethnicity  
26 comparison, the cities included in our analysis contain between 68% and 88% of the  
27 California population.  
28  
29  
30  
31  
32

33  
34 Cross-sectional data cannot be used to establish causal relationships or directionality.  
35 Our finding that a community's poverty rate and its racial/ethnic disparities are  
36 interrelated will require longitudinal, confirmatory studies. Studies in the United States  
37 and western countries suggest that income inequality inhibits overall economic  
38 development and economic mobility.<sup>12</sup>  
39  
40  
41  
42  
43  
44

45  
46 The time period of this study coincided with high levels of economic instability during the  
47 Great Recession, 2007-2009. Cities and regions might have since experienced  
48 economic recovery, gentrification, population displacement, and community succession.  
49 Due to lags in reporting, ACS data may not reflect current conditions.  
50  
51  
52  
53  
54  
55  
56  
57  
58  
59  
60

## What Can Cities Do?

While cities alone cannot be expected to solve economic and educational disparities, they play an important role in shaping the social determinants of health through people- and place-based strategies.<sup>13</sup> In the United States local government plays an active role in recruiting and retaining employers, establishing preferences for minority-owned businesses, adopting local first-hire policies, and legislating minimum wages. School districts and boards exert local control over school policy and funding, whether the bulk of funds are from state or local taxes. Through local zoning, urban revitalization, and the creation of enterprise zones, local government shapes the built environment and the availability of resources for the basics of living (e.g., food outlets, housing, jobs, transportation). Local housing authorities implement federal and state policies that influence the availability and placement of affordable housing. Several health impact assessments and health studies document the likely and actual health promoting impacts of minimum wage ordinances<sup>14 15</sup> and housing vouchers that relocate renters from neighbourhoods with concentrated poverty to those with low poverty.<sup>16 17</sup> Many cities are examining their own internal policies and practices with regard to hiring, procurement, and building capacity through authentic deep community engagement.

Local elected officials often comprise the governing bodies of regional associations of government, which make decisions on regional transportation, housing, and economic investments. Economic development strategies forged at a regional level have a wide ranging impact at the local level.<sup>18</sup> There is evidence that some strategies that promote overall regional economic development may exacerbate economic disparities.<sup>19</sup>

## What Can Local Health Departments Do?

### Data and Surveillance

In general, SDOH indicators have not been institutionalised in public health surveillance at the state and local level in the same manner as mortality surveillance, communicable



DRAFT

CONFIDENTIAL

16

1  
2  
3 disease reporting, and behavioral risk factor surveillance. Monitoring SDOH geographic  
4 variation, time trends, and population subgroups help assess the magnitude of the  
5 problem, identify high risk groups, monitor progress toward meeting goals, set priorities,  
6 and target resources for intervention. Several U.S. states have offices of health equity,  
7 which issue periodic reports.<sup>20 21</sup> Due to requirements of the Affordable Care Act (ACA),  
8 LHDs in partnership with nonprofit hospitals and community coalitions are producing  
9 community health needs assessments and improvement plans [US IRS Code Title IX,  
10 §6033(b)], frequently framing health disparities in terms of SDOH.<sup>22 23</sup> ACA  
11 implementation supports the institutionalization of surveillance of the SDOH at  
12 geographically resolved areas throughout the United States.  
13  
14  
15  
16  
17  
18  
19  
20  
21  
22

23 Health departments can also use the distribution of within-city inequities to identify  
24 specific cities that share socioeconomic and demographic similarities, but differ on  
25 health inequities. Fostering exchanges like learning collaboratives or intervention trials  
26 between peer cities may be but one mechanism to engage cities and identify successful  
27 strategies to reduce inequities.  
28  
29  
30  
31  
32

33 Some LHDs are taking systematic approaches to link SDOH surveillance data to action  
34 in the form of how-to guides,<sup>24</sup> internal capacity building, and setting explicit goals and  
35 activities to reduce disparities.<sup>25</sup>  
36  
37  
38  
39

#### 40 Internal Capacity Building on Racial and Health Equity

41  
42  
43

44 Efforts to examine and counter structural racism in health inequities are being integrated  
45 into public health practice by identifying upstream causes,<sup>21 26</sup> and conducting  
46 assessments of organizational behavior in health departments. Educational and action-  
47 oriented workshops, training, and toolkits are increasingly part of public health  
48 workforce development, program design, policy development, and evaluation<sup>27 28</sup> and  
49 should touch areas relevant to public health department accreditation.  
50  
51  
52  
53  
54  
55  
56  
57  
58  
59  
60

DRAFT

CONFIDENTIAL

17

## Health in All Policies

With the ascendance of Health in All Policies (HiAP),<sup>5</sup> public health departments have opportunities to play an active and direct role in educating policy makers on the SDOH and health equity. Because different sectors may frame equity in profoundly different ways,<sup>29</sup> public health practitioners can convene and constructively engage partners, including those central to economic development and education. HiAP-related actions include health impact assessments, advising and participating in cross-sector planning (e.g., land use, transportation, food systems), and developing tools that non-health planners can use to quantify the health benefits or harms of various policies or programs.<sup>27</sup>

## Service Environment

Overcoming fragmented social services delivery is highly desirable and underpins comprehensive models of service delivery that may have collective impact and address SDOHs.<sup>30 31</sup> Building on city-level data of poverty and educational inequities, health departments can play a role in monitoring and evaluating the equitable access and distribution of services provided by the health department and other social service agencies.

## Conclusions

Racial, ethnic, and geographic disparities in poverty and educational attainment in adults are widespread within and between California cities. Given that public health practice is increasingly focused upstream, surveillance of the social determinants of health may afford opportunities for engagement with neighbourhoods, cities, and regional government to be an active partner in strategies that promote health and reduce poverty and low educational attainment.

DRAFT

CONFIDENTIAL

18

**ACKNOWLEDGEMENTS**

The authors acknowledge valuable review and comments by Dr. Linda Rudolph and Brad Jacobsen.

**CONTRIBUTORS**

DB and NM shared responsibilities in the design, analysis, and write up of this research.

**FUNDING**

This research was self-sponsored by the authors and did not receive funding from a public, commercial or not-for-profit agency. The California Strategic Growth Council and The California Department of Public Health funded and created the datasets used in this analysis. The views expressed by the authors are their own and do not necessarily reflect those of employers or organizations with whom they have/had affiliations.

**COMPETING INTERESTS**

None declared.

**PROTECTION OF HUMAN SUBJECTS IN RESEARCH**

This study used publicly available data and did not involve human subjects in research.

**DATA SHARING STATEMENT**

This study used publicly available data. Data sets used in this analysis can be downloaded from:

<http://www.cdph.ca.gov/programs/Pages/HealthyCommunityIndicators.aspx>.

## REFERENCES

- 1 Agency for Healthcare Research and Quality. 2014 National Healthcare Quality and Disparities Report. AHRQ Publication No. 15-0007. Rockville, MD: Agency for Healthcare Research and Quality 2015.
- 2 Centers for Disease Control and Prevention. CDC Health Disparities and Inequalities Report — United States, 2013. *MMWR* 2013;62:Suppl 3.
- 3 National Center for Health Statistics. Health, United States, 2014: With Special Feature on Adults Aged 55–64. Hyattsville, MD: U.S. Department of Health and Human Services 2015.
- 4 Braveman P. What are health disparities and health equity? We need to be clear. *Public Health Rep* 2014;129:(Suppl 2):5-8.
- 5 Rudolph L, Caplan J, Mitchell C, *et al*. Health in All Policies: Improving Health Through Intersectoral Collaboration. Washington, DC: Institute of Medicine 2013.
- 6 U.S. Department of Health and Human Services. Healthy People 2020. Topics & Objectives: Social Determinants of Health. Washington, DC: U.S. Department of Health and Human Services 2015.
- 7 Galea S, Tracy M, Hoggatt K, *et al*. Estimated deaths attributable to social factors in the United States. *Am J Public Health* 2011;101:1456–65.
- 8 U.S. Bureau of Census. American Community Survey: Code Lists, Definitions, and Accuracy. Washington, DC: U.S. Department of Commerce 2014.
- 9 U.S. Bureau of Census. American Community Survey: Design and Methodology. Version 2.0. Washington, DC: U.S. Department of Commerce 2014.
- 10 R Core Team. R: A Language and Environment for Statistical Computing. Vienna, Austria: R Foundation For Statistical Computing 2015.
- 11 Iceland J, Weinberg DH, Steinmetz E. Racial and Ethnic Residential Segregation in the United States: 1980-2000. Series CENSR-3. Washington, DC: U.S. Census Bureau 2002.
- 12 Cingano F. Trends in Income Inequality and its Impact on Economic Growth. OECD Social, Employment and Migration Working Papers, No. 163. Paris, France: Organisation for Economic Co-operation and Development Publishing 2014.
- 13 Pastor M, Turner M. Reducing Poverty and Economic Distress after ARRA Potential Roles for Place-conscious Strategies. Washington, DC: Urban Institute 2010.
- 14 Bhatia R, Katz M. Estimation of Health Benefits From a Local Living Wage Ordinance. *Am J Public Health* 2001;91:1398-402.
- 15 Cole BL, Shimkhada R, Morgenstern M, *et al*. Projected health impact of the Los Angeles City living wage ordinance. *J Epidemiol Community Health* 2005;59:645-50.
- 16 Chetty R, Hendren N, Katz L. The Effects of Exposure to Better Neighborhoods on Children: New Evidence from the Moving to Opportunity Experiment. Cambridge, MA: Harvard University and NBER 2015.

DRAFT

CONFIDENTIAL

20

- 1  
2  
3  
4  
5  
6  
7  
8  
9  
10  
11  
12  
13  
14  
15  
16  
17  
18  
19  
20  
21  
22  
23  
24  
25  
26  
27  
28  
29  
30  
31  
32  
33  
34  
35  
36  
37  
38  
39  
40  
41  
42  
43  
44  
45  
46  
47  
48  
49  
50  
51  
52  
53  
54  
55  
56  
57  
58  
59  
60
- 17 Ludwig J, Sanbonmatsu L, Gennetian L, *et al.* Neighborhoods, obesity, and diabetes — A randomized social experiment. *N Engl J Med* 2011;365:1509-19.
- 18 Porter M. The economic performance of regions. *Regional Studies* 2003;37:549-78.
- 19 Morrill R. Inequality of the largest U.S. metropolitan areas. *New Geography* 9/11/2013.
- 20 Office of Health Equity. Portrait of Promise: The California Statewide Plan to Promote Health and Mental Health Equity. A Report to the Legislature and the People of California by the Office of Health Equity. Sacramento, CA: California Department of Public Health, Office of Health Equity 2015.
- 21 Minnesota Department of Public Health. Advancing Health Equity in Minnesota: Report to the Legislature. St. Paul, MN: Minnesota Department of Public Health 2014.
- 22 Tulsa Health Department. Community Health Improvement Plan: Pathways to Health. Tulsa, OK: Pathways to Health.org 2014.
- 23 BeHealthyDenver.org. Health of Denver Report: Community Health Assessment. Denver, CO: BeHealthyDenver.org 2014.
- 24 Bay Area Regional Health Inequities Initiative Data Committee. Applying Social Determinants of Health Indicators to Advance Health Equity: A Guide for Local Health Department Epidemiologists and Public Health Professionals. Oakland, CA: Bay Area Regional Health Inequities Initiative 2015.
- 25 Multnomah County Health Department. Health Equity Initiative. A Five Year Reflection: Policy Crosswalk, 2008-2013. Portland, OR: Multnomah County Health Department 2013.
- 26 Gee G, Ford C. Structural racism and health inequities: old issues, new directions. *Du Bois Rev* 2011;8:115-32.
- 27 Nelson J. Racial Equity Toolkit: An Opportunity to Operationalize Equity. Berkeley, CA: Government Alliance on Race and Equity, Haas Institute for a Fair & Inclusive Society, University of California, Berkeley 2015.
- 28 Internal Capacity Committee of BARHII. Local Health Department Organizational Self-Assessment for Addressing Health Inequities: Toolkit and Guide to Implementation. Oakland, CA: Bay Area Regional Health Inequities Initiative 2010.
- 29 Committee on Equity Implications of Evolving Transportation Finance Mechanisms. Equity of Evolving Transportation Finance Mechanisms. Special Report 303. Washington, D.C.: Transportation Research Board 2011.
- 30 Kania J, Kramer M. Collective Impact. *Stanford Social Innovation Review* 2011;Winter.
- 31 Nicholas SW, Jean-Louis B, Ortiz B, *et al.* Addressing the childhood asthma crisis in Harlem: the Harlem Children's Zone Asthma Initiative. *Amer J Public Health* 2005;95:245-9.

**FIGURES LEGENDS**

**Figure 1.** Distribution of Within-City Differences in (a) Poverty Rate and (b) Low Educational Attainment for Pairwise Comparisons of California Whites, Blacks, Latinos, and Asians, 2006-2010. \*Considering Whites as a socially advantaged reference group, the differences that favor Whites are considered inequities. The legends show the percent of cities in which the  $p_2$  race/ethnicity group has a better outcome and the percent of cities in which the outcome is statistically significant ( $p < 0.1$ ). For instance, "Black-Asian (77%, 31%)" indicates that 77% of the cities in which the comparison is possible have a better outcome for the Asian group and 31% of those cities have a significantly better outcome.

**Figure 2.** Within-City Poverty Rate Differences and Overall City Poverty Rate (a) and Low Educational Attainment and Overall City Low Educational Attainment (b), California Cities, 2006-2010.  $r$  is the Pearson correlation coefficient between within city differences and the overall city value. \*Considering Whites as a socially advantaged reference group, the differences that favor Whites are considered inequities.

**Figure 3.** Distribution of Within-City Differences in the Highest and Lowest Census Tract Rates for Educational Attainment and Poverty, California, 2006-2010.

1  
2  
3  
4  
5  
6  
7  
8  
9  
10  
11  
12  
13  
14  
15  
16  
17  
18  
19  
20  
21  
22  
23  
24  
25  
26  
27  
28  
29  
30  
31  
32  
33  
34  
35  
36  
37  
38  
39  
40  
41  
42  
43  
44  
45  
46  
47  
48  
49  
50  
51  
52  
53  
54  
55  
56  
57  
58  
59  
60

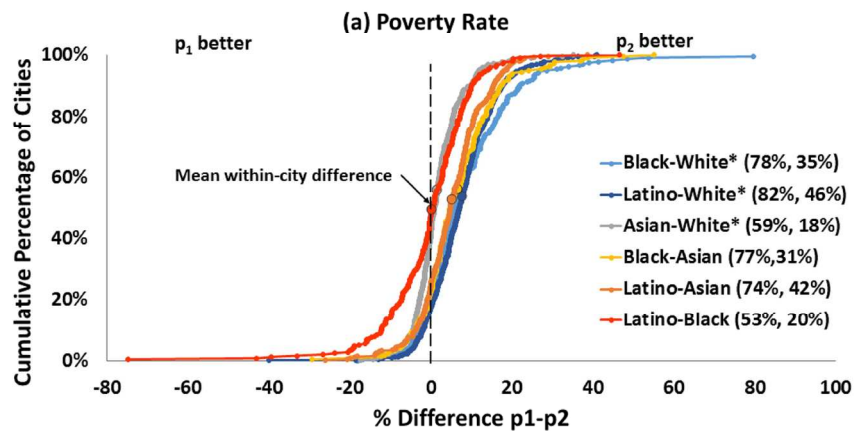

302x170mm (300 x 300 DPI)

review only

1  
2  
3  
4  
5  
6  
7  
8  
9  
10  
11  
12  
13  
14  
15  
16  
17  
18  
19  
20  
21  
22  
23  
24  
25  
26  
27  
28  
29  
30  
31  
32  
33  
34  
35  
36  
37  
38  
39  
40  
41  
42  
43  
44  
45  
46  
47  
48  
49  
50  
51  
52  
53  
54  
55  
56  
57  
58  
59  
60

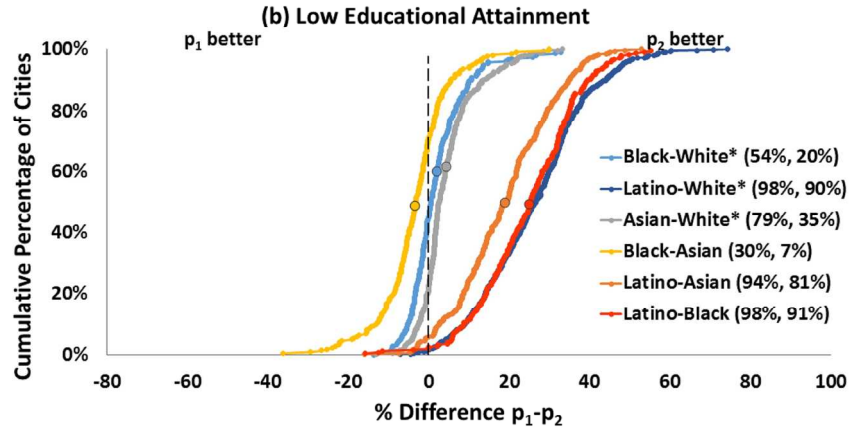

302x170mm (300 x 300 DPI)

review only



1  
2  
3  
4  
5  
6  
7  
8  
9  
10  
11  
12  
13  
14  
15  
16  
17  
18  
19  
20  
21  
22  
23  
24  
25  
26  
27  
28  
29  
30  
31  
32  
33  
34  
35  
36  
37  
38  
39  
40  
41  
42  
43  
44  
45  
46  
47  
48  
49  
50  
51  
52  
53  
54  
55  
56  
57  
58  
59  
60

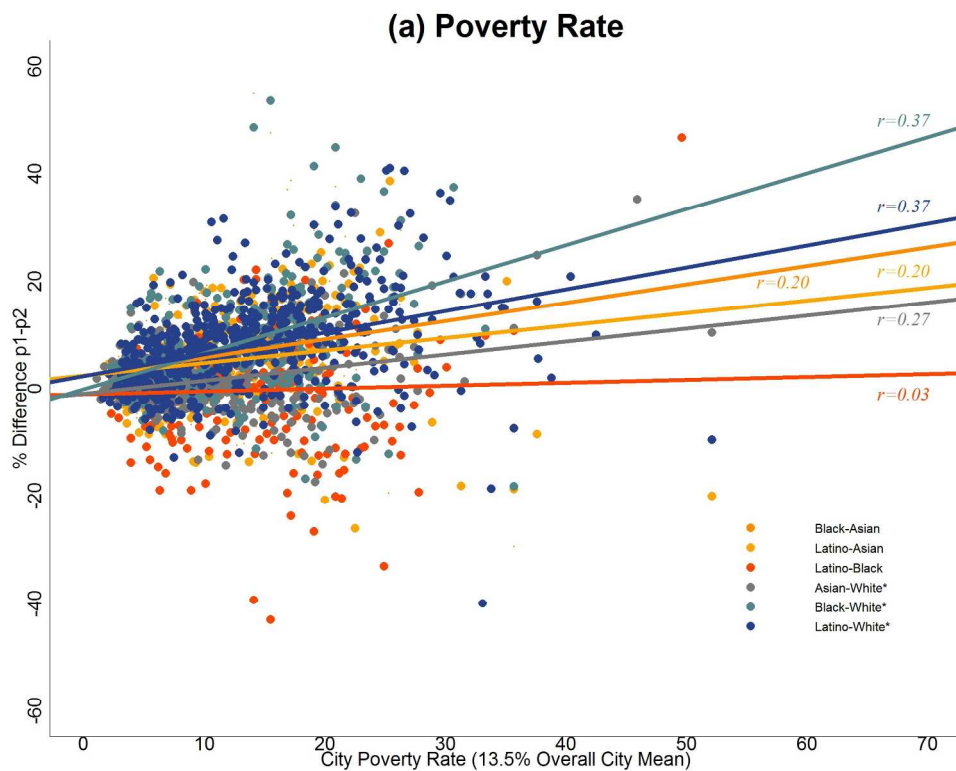

216x170mm (300 x 300 DPI)

ew only

1  
2  
3  
4  
5  
6  
7  
8  
9  
10  
11  
12  
13  
14  
15  
16  
17  
18  
19  
20  
21  
22  
23  
24  
25  
26  
27  
28  
29  
30  
31  
32  
33  
34  
35  
36  
37  
38  
39  
40  
41  
42  
43  
44  
45  
46  
47  
48  
49  
50  
51  
52  
53  
54  
55  
56  
57  
58  
59  
60

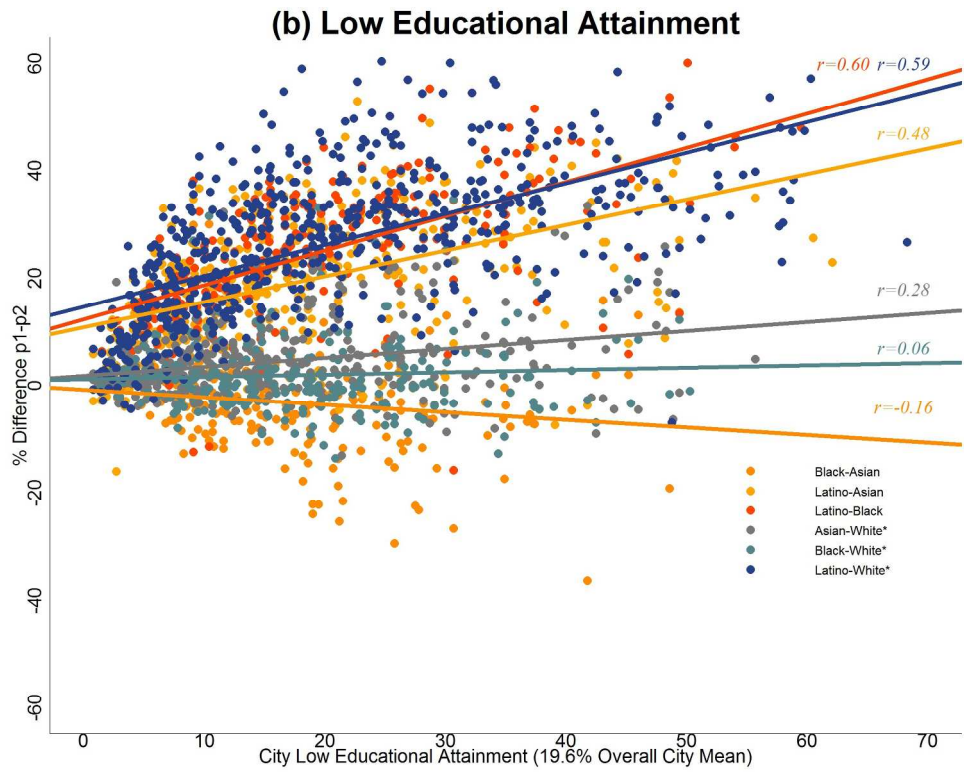

216x170mm (300 x 300 DPI)

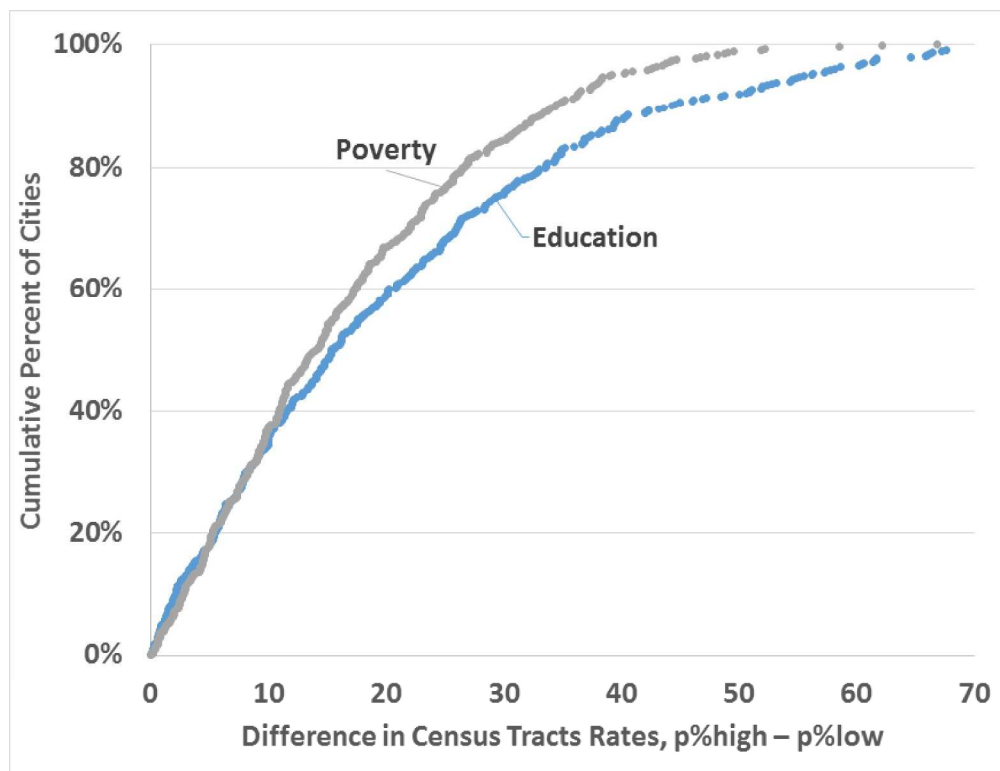

222x170mm (300 x 300 DPI)

ew only

1  
2  
3  
4  
5  
6  
7  
8  
9  
10  
11  
12  
13  
14  
15  
16  
17  
18  
19  
20  
21  
22  
23  
24  
25  
26  
27  
28  
29  
30  
31  
32  
33  
34  
35  
36  
37  
38  
39  
40  
41  
42  
43  
44  
45  
46  
47  
48  
49  
50  
51  
52  
53  
54  
55  
56  
57  
58  
59  
60

# BMJ Open

## Surveillance of the Social Determinants of Health in California Communities: Racial, Ethnic, and Geographic Disparities

|                                 |                                                                                          |
|---------------------------------|------------------------------------------------------------------------------------------|
| Journal:                        | <i>BMJ Open</i>                                                                          |
| Manuscript ID                   | bmjopen-2016-013975.R1                                                                   |
| Article Type:                   | Research                                                                                 |
| Date Submitted by the Author:   | 15-Dec-2016                                                                              |
| Complete List of Authors:       | Bustamante, Dulce<br>Maizlish, Neil                                                      |
| <b>Primary Subject Heading</b>: | Public health                                                                            |
| Secondary Subject Heading:      | Epidemiology                                                                             |
| Keywords:                       | EPIDEMIOLOGY, PUBLIC HEALTH, Health policy < HEALTH SERVICES ADMINISTRATION & MANAGEMENT |
|                                 |                                                                                          |

SCHOLARONE™  
Manuscripts

1  
2  
3  
4  
5  
6  
7  
8  
9 Title: **Surveillance of the Social Determinants of Health in California**  
10 **Communities: Racial, Ethnic, and Geographic Disparities**  
11  
12

13  
14  
15  
16 Authors: Dulce Bustamante-Zamora, PhD  
17 1126 Cherry Ave #56, San Bruno, California, 94066, USA  
18 [dulce\\_mariab@hotmail.com](mailto:dulce_mariab@hotmail.com)  
19 Tel. (650) 730-0329  
20

21 Corresponding Author: Neil Maizlish, PhD, MPH  
22 1226 Carlotta Ave, Berkeley, California, 94707, USA  
23 [neil3971@comcast.net](mailto:neil3971@comcast.net)  
24 Tel. (510) 525-4939  
25  
26  
27  
28

29 Key Words: health inequity, health disparity, poverty, educational attainment, race/ethnicity,  
30 neighbourhood  
31

32  
33 Word Count: 3,556  
34  
35  
36  
37  
38  
39  
40  
41  
42  
43  
44  
45  
46  
47  
48  
49  
50  
51  
52  
53  
54  
55  
56  
57  
58  
59  
60

## ABSTRACT

### Objective

To study the magnitude and direction of city level racial and ethnic differences in poverty and education to examine health equity and social determinants of health in California communities.

### Design

We used data from the American Community Survey, United States Census Bureau, 2006-2010, and calculated differences in the prevalence of poverty and low educational attainment in adults by race/ethnicity and by census tracts within California cities. For race/ethnicity comparisons, when the referent group ( $p_2$ ) to calculate the difference ( $p_1 - p_2$ ) was the non-Hispanic White population (considered a historically advantaged group), a positive difference was considered a health inequity. Differences with a non-White reference group were considered health disparities.

### Setting

Cities and towns of the State of California, United States.

### Results

Within-city differences in the prevalence of poverty and low educational attainment disfavored Black and Latinos compared to Whites in over 78% of cities. Compared to Whites, the median within-city poverty difference was 7.0% for Latinos and 6.2% for Blacks. For education, median within-city difference was 26.6% for Latinos compared to Whites. In a small, but not negligible proportion of cities, historically disadvantaged race/ethnicity groups had better social determinants of health outcomes than Whites. The median difference between the highest and lowest census tracts within cities was 14.3% for poverty and 15.7% for low educational attainment. Overall city poverty rate was weakly, but positively correlated with within-city racial/ethnic differences.

## Conclusions

Disparities and inequities are widespread in California. Local health departments can partner with cities in their jurisdiction on strategies to reduce racial, ethnic and geographic differences in economic and educational outcomes.

For peer review only

## ARTICLE SUMMARY

### STRENGTHS AND LIMITATIONS OF THIS STUDY

- To our knowledge, this is the first comprehensive tabulation of pairwise within-city SDOH differences between major race/ethnic groups and neighbourhoods across California's cities.
- Most multi-level, place-based research, examines individual and neighborhood impacts, but often bypasses city as a "place": racial and ethnic differences in health outcomes and their social determinants are widely reported in the United States at the national, state, and county scale, with non-Hispanic White populations usually experiencing the best outcomes.
- This article fills a geographic gap in current public health surveillance by documenting the glaring disparities in poverty and low educational attainment by race/ethnicity and neighborhood that exist within nearly every California city.
- Examination of the geographical extent and magnitude of disparities in the social determinants is essential to engage local government in "health in all policies" and collaborations with public health agencies.
- As a univariate analysis, our findings have several limitations including lack of examination of other social determinants that could mediate the outcomes, time period of the study that coincides with high levels of economic instability during the Great Recession, 2007-2009, and use of aggregated data that masks the heterogeneity of sub-populations within the racial and ethnic groups studied.



## INTRODUCTION

Differences in health outcomes or their determinants are widely reported between racial and ethnic groups in the United States at the national, state, and county scale.<sup>1-3</sup>

Differences that are avoidable, unfair and rooted in historical social disadvantage are defined as health inequities. Differences with biological or other underlying causes are health disparities.<sup>4</sup> County and city local health departments (LHDs) increasingly recognise their role in addressing the social determinants of health (SDOH) that underlie health inequities. LHDs are also reaching out to non-health sectors in their communities to impact the root causes of health inequities through "Health in All Policies".<sup>5</sup>

Geographic analysis of SDOH is used to reveal health inequities, and prioritise public health interventions and target community engagement. While an increasing number of LHDs examine health inequities at small geographies, most rely on county level data that masks important differences within counties. The surveillance of SDOH at small geographies poses methodological challenges and opportunities for taking data to action. In assessing racial and ethnic inequities, non-Hispanic Whites are often considered the socially advantaged referent group. It has been posited that it is relatively rare for the most privileged group not to have the best outcome.<sup>4, p187</sup>

We explore racial, ethnic, and geographic differences in poverty and low educational attainment. Poverty reduction, increasing educational attainment, and the elimination of health disparities are national health goals of the United States<sup>6</sup>; these two SDOH may account for 18% of the national burden of mortality.<sup>7</sup>

We examined 1) the magnitude and direction of racial, ethnic and geographical differences in these SDOH within and between California cities, 2) the relationship between overall community disadvantage and SDOH disparities and inequities, and 3) possible actions that LHDs may consider based on surveillance findings.

## METHODS

### Data Source

We used data from the American Community Survey (ACS),<sup>8,9</sup> a continuous prevalence survey based on a probability sample of households throughout the United States. ACS publishes data in 5-year tabulations for cities and census tracts. We used ACS Selected Population Tables (2006-2010), which stratify the tabulations by mutually exclusive race and ethnicity categories: Hispanic or Latino, and non-Hispanic persons of the following races: White, Black, Asian, Native Hawaiian and Other Pacific Islander, Other, Multiple, and American Indian/Alaskan Native. For California, the ACS reported on 8,057 census tracts, 480 incorporated cities, and 1,043 non-incorporated places. The prevalence of poverty and its standard error were obtained from ACS Table DP03, and educational attainment in adults and its standard error were obtained from Table DP02. The California Department of Public Health compiled these data ([www.cdph.ca.gov/programs/pages/healthycommunityindicators.aspx](http://www.cdph.ca.gov/programs/pages/healthycommunityindicators.aspx)).

### ACS Definition of Poverty and Educational Attainment

The prevalence of poverty was defined as the 5-year annual average percentage of all individuals whose household income in the past 12 months was below the federal poverty level. Total household income was calculated from eight questions on the ACS-1 form about wages, self-employment, securities, rental property, retirement and disability payments, and public assistance. Households were classified as poor when total income of the householder's family was below an income threshold, taking into account the size of the family, number of related children, and, for 1- and 2-person families, age of householder.<sup>8</sup> The prevalence of educational attainment less than high school was defined as the 5-year annual average percentage of adults aged 25 years or older whose maximum educational attainment was 0 to 11 years of grade school.

## Between-City, Within-City, and Neighbourhood Level Racial and Ethnic Disparities and Inequities and Statistical Methods

We calculated between-city, within-city, and neighbourhood level differences for combinations of White, Asian, Latino, and Black subgroups.

Differences in the 5-year percentage of poverty or low educational attainment,  $p$ , were calculated between pairs of racial/ethnic groups,  $p_1 - p_2$ . Differences have a positive or negative sign based on the referent group ( $p_2$ ). When the referent group,  $p_2$ , was White, a positive difference represents a health inequity. Differences with a non-White reference group were considered health disparities. For cities with two or more census tracts, neighbourhood disparities were defined as the absolute difference of census tracts with the highest and lowest 5-year percentage.

Mean and medians of between- and within-city differences and their standard deviation were calculated. The between-city mean difference was defined as the difference of the mean prevalence of two specified race/ethnicity groups across all cities:

$$\text{Between - city mean difference} = \frac{\sum_{i,j} p_{i,j}}{N_{\text{Total}(j)}} - \frac{\sum_{i,k} p_{i+1,k}}{N_{\text{Total}(k)}}$$

where  $i$  is the  $i^{\text{th}}$  race/ethnicity group and  $j$  is the  $j^{\text{th}}$  of  $N$  total cities of group  $i$ , and  $k$  is the  $k^{\text{th}}$  of  $N$  total cities of group  $i+1$ .

The within-city mean difference was defined as:

$$\text{Within - city mean difference} = \frac{\sum_{i,j} (p_{i,j} - p_{i+1,j})}{N_{\text{Total}(j)}}$$

where  $i$  is the  $i^{\text{th}}$  race/ethnicity group and  $j$  is the  $j^{\text{th}}$  of city of  $N_{\text{Total}}$  cities where data on both of the race/ethnicity pairs are available.

Within-city differences were plotted as cumulative frequency distributions of cities for each pairwise race/ethnicity comparison in order to assess the magnitude and direction

1  
2  
3 of racial and ethnic inequities or disparities in cities across the state. For each city, Z-  
4 tests were carried out to determine whether the within-city difference was statistically  
5 significant. We followed U.S. Census Bureau guidelines for pooling standard errors of  
6 percents, which is the square root of the sum of the squares of the two individual  
7 standard errors ( $se = \sqrt{se_1^2 + se_2^2}$ ). A p value of 0.10 was considered statistically  
8 significant. R software was used for the calculations.<sup>10</sup>  
9  
10  
11  
12  
13

14  
15  
16 SDOH differences are often interpreted in the context of the range of their absolute  
17 values. For example, in some very poor communities there may be no demonstrable  
18 differences between groups and "everyone is poor together". In other communities,  
19 there is a small, but statistically significant difference between groups, but each group  
20 is relatively well off (e.g., has a SDOH value far above the mean.) To contextualise a  
21 city's disparities or inequities on a backdrop of high or low rate of poverty or educational  
22 attainment, we plotted within-city disparities or inequities, as a function of the between-  
23 city poverty rate (or educational attainment). Simple linear correlation (Pearson, r)  
24 assessed the strength of association.  
25  
26  
27  
28  
29  
30  
31  
32  
33

### 34 **Calculation of Neighbourhood Disparities**

35  
36  
37 Census tract and city boundaries are not always congruent; therefore, for  
38 neighbourhood analyses, census tracts were associated with the city into which its  
39 centroid fell. We used ArcGIS 10.3 (ESRI, Redlands, CA) to calculate and associate  
40 centroids with cities. In some cases, portions of census tracts outside of city limits were  
41 included in neighbourhood comparisons. This introduces some potential  
42 misclassification if the outlying portion of the census tract has different poverty or  
43 educational attainment. We also calculated the mean linear distance in miles between  
44 the centroids of the census tracts with the highest and lowest poverty and educational  
45 outcomes.  
46  
47  
48  
49  
50  
51  
52

### 53 **Exclusions**

1  
2  
3 The ACS does not publish data for geographic areas with fewer than 50 respondents.  
4  
5 Of 1,523 cities the number available for within-city pairwise comparisons varied by  
6  
7 race/ethnicity subgroup: 221 cities had data for Black-Asian comparisons, 280 for  
8  
9 Asian-White, 245 for Black-White, 364 for Latino-Asian, 252 for Latino-Black, and 611  
10  
11 for Latino-White. We did not have sufficient data to carry out pairwise comparisons that  
12  
13 included American Indian/Native Alaskans, Native Hawaiians and Other Pacific  
14  
15 Islanders, Multiple races, and Other. Analyses of poverty at the census tract level  
16  
17 excluded economically dependent populations in colleges, correctional facilities, and  
18  
19 other group quarters and institutions. Two census tracts with a population less than 500  
20  
21 inhabitants were also excluded.  
22

### 23 **Association between Within-City Geographic Disparities in Educational** 24 **Attainment and Poverty with Within-City Disparities in Life Expectancy at Birth**

25  
26 To illustrate the association between SDOH and health outcomes within California cities  
27  
28 we calculated the correlation coefficient between census tract level life expectancy at  
29  
30 birth (LEB) and the two social determinants. The LEB data for California census tracts  
31  
32 is publically available through the Health Disadvantage Index Project  
33  
34 (<http://phasocal.org/ca-hdi/>). The census tracts with the highest and lowest education  
35  
36 educational attainment and those with the highest and lowest poverty rates were  
37  
38 matched with their LEB. Within cities, the differences between minimum and maximum  
39  
40 (min-max) SDOH and health outcomes, respectively, was calculated. Census tract  
41  
42 differences in educational attainment and poverty were scaled so that positive  
43  
44 differences indicated greater disparities. Census tract difference in LEB were scaled so  
45  
46 that positive differences indicated increases in life expectancy, and conversely, negative  
47  
48 differences indicated a lower life expectancy. The correlation coefficient between the  
49  
50 differences (min-max) was calculated in R.  
51  
52  
53  
54  
55  
56  
57  
58  
59  
60

## RESULTS

### Between- and Within-City Racial and Ethnic Disparities and Inequities

The poverty rate of Latinos (18.6%) and Blacks (17.4%) averaged over California cities was nearly twice that of Whites (9.2%) and Asians (9.5%) (Table 1).

**Table 1** Between and Within-City Means and Race-Ethnicity Specific Pairwise Differences in Poverty Rate and Educational Attainment, California, 2006-2010

|                                                        | Percent below the federal poverty level |        |             | Percent of adults aged $\geq 25$ years without a high school education |              |        |             |        |
|--------------------------------------------------------|-----------------------------------------|--------|-------------|------------------------------------------------------------------------|--------------|--------|-------------|--------|
|                                                        | Mean                                    | SD     | Median      | Mean                                                                   | SD           | Median |             |        |
| Between cities                                         |                                         |        |             |                                                                        |              |        |             |        |
| White                                                  | 9.2                                     | 6.9    | 7.5         | 8.7                                                                    | 7.3          | 6.7    |             |        |
| Black                                                  | 17.4                                    | 12.9   | 14.6        | 11.0                                                                   | 8.9          | 8.8    |             |        |
| Asian                                                  | 9.5                                     | 8.7    | 7.1         | 12.4                                                                   | 9.8          | 9.7    |             |        |
| Latino                                                 | 18.6                                    | 11.4   | 16.8        | 39.6                                                                   | 18.4         | 39.9   |             |        |
| Pairwise differences (p <sub>1</sub> -p <sub>2</sub> ) | Between city                            |        | Within city |                                                                        | Between city |        | Within city |        |
|                                                        | Mean                                    | Median | Mean        | Median                                                                 | Mean         | Median | Mean        | Median |
| Black-White                                            | 8.2                                     | 7.1    | 8.5         | 6.2                                                                    | 2.3          | 2.1    | 2.0         | 0.6    |
| Asian-White                                            | 0.3                                     | -0.4   | 1.7         | 0.9                                                                    | 3.7          | 3.0    | 4.4         | 2.7    |
| Latino-White                                           | 9.4                                     | 9.3    | 7.6         | 7.0                                                                    | 30.9         | 33.2   | 26.2        | 26.6   |
| Black-Asian                                            | 7.9                                     | 7.5    | 6.5         | 4.8                                                                    | -1.4         | -0.9   | -3.3        | -3.1   |
| Latino-Asian                                           | 9.1                                     | 9.7    | 5.1         | 4.8                                                                    | 27.2         | 30.2   | 19.0        | 19.2   |
| Latino-Black                                           | 1.2                                     | 2.2    | 0.3         | 0.5                                                                    | 28.6         | 31.1   | 24.9        | 25.4   |

DRAFT

CONFIDENTIAL

11

1  
2  
3 The city average percentage of adults with low educational attainment was 3-4 times  
4 higher in Latinos compared to Whites, Asians, or Blacks. The largest mean between-  
5 city educational inequity (30.9%) was between Latinos and Whites.  
6  
7  
8  
9

10 The distribution of within-city differences of race/ethnicity pairs is presented for poverty  
11 and low educational attainment (Figure 1). In a large percentage of cities, Asians and  
12 Whites had better poverty outcomes than Latinos or Blacks. The largest inequities  
13 occurred between Blacks and Whites (8.5% mean difference) and Latinos and Whites  
14 (7.6%). In approximately 40% of cities, these differences were statistically significant.  
15 Latinos had better poverty outcomes than Asians or Whites in 26% and 18% of cities,  
16 respectively. Likewise, Blacks had better outcomes than Asians or Whites in  
17 approximately 20% of cities. The average differences in within-city poverty rates  
18 between Blacks and Latinos were small (0.3%), but there was considerable variation.  
19  
20  
21  
22  
23  
24  
25  
26  
27

28 For low educational attainment (Figure 1 b), the largest mean difference was between  
29 Latinos and other groups (Latino-Whites, 26.2%; Latino-Blacks, 24.9%; Latino-Asians,  
30 19.0%). Whites tended to have better outcomes than Asians or Blacks. Blacks tended to  
31 have better outcomes than Asians. Latinos had poorer outcomes than the other groups  
32 in almost all cities (94% or higher). An overwhelming majority of within-city differences  
33 between Latinos and other groups were statistically significant.  
34  
35  
36  
37  
38  
39

40 Supplemental materials include maps of California cities depicting the race/ethnicity with  
41 the largest disparity for poverty or educational attainment.  
42  
43  
44

### 45 **Between- and Within-City Racial and Ethnicity Correlations**

46  
47

48 Within-city racial/ethnic differences in poverty and overall city poverty rate (Figure 2 a),  
49 appear to be correlated for all race/ethnicity combinations with White or Asian referents,  
50 but exhibit considerable variability (scatter). Black and Latino inequities (White  
51 referents) tended to be larger at higher levels of overall poverty ( $r = 0.37$ ,  $P < 0.01$ ). A  
52  
53  
54  
55  
56  
57  
58  
59  
60



DRAFT

CONFIDENTIAL

12

1  
2  
3 weaker association ( $r = 0.20$ ,  $P < 0.01$ ) was observed for Black or Latinos with Asian  
4 referents.  
5  
6

7  
8  
9 In a large proportion of California cities, Latinos experience both large educational  
10 disparities and live in cities with low overall educational attainment. Within-city  
11 education differences between Latinos and other groups were strongly associated ( $r$   
12 range: 0.48 to 0.60) with overall city low educational attainment (Figure 2 b).  
13  
14  
15

### 16 17 **Neighbourhood Disparities**

18  
19  
20  
21 The distribution of within-city differences of poverty and educational attainment between  
22 the highest and lowest census tract is presented in Figure 3. The median difference was  
23 14.3% for poverty and 15.7% for educational attainment. Disparities of 25% or greater  
24 were observed in 25% of cities for poverty and 33% of cities for educational attainment.  
25  
26 In approximately 73% of 500 cities with two or more census tracts, the differences were  
27 statistically significant. For the 174 cities with 10 or more census tracts, 99% of  
28 differences were statistically significant. The median straight-line distance between the  
29 highest and lowest census tracts was 2.6 km (SD, 3.2) for poverty and 2.9 km (SD,  
30 3.04) for educational attainment.  
31  
32  
33  
34  
35  
36  
37

### 38 39 **Within-City Associations between Disparities in Life Expectancy at Birth and** 40 **Disparities in the SDOH**

41  
42  
43  
44 Within cities, increasing disparities in educational attainment between census tracts with  
45 the highest and lowest levels were significantly correlated with increasing disparities in  
46 which life expectancy decreased (Pearson  $r = -0.24$ ,  $p < 0.001$ ). A similar significant  
47 correlation was found for poverty disparities and life expectancy (Pearson  $r = -0.28$ ). In  
48 simple linear regression analyses, 0.08 years of life expectancy was lost for each  
49 percent of educational disparity and 0.05 years of life expectancy was lost for each  
50 percent of poverty disparity.  
51  
52  
53  
54  
55  
56  
57  
58  
59  
60



DRAFT

CONFIDENTIAL

13

## DISCUSSION

We found widespread racial, ethnic, and geographic differences in educational attainment and poverty within California cities. Comparisons between Whites and Blacks and Whites and Latinos generally conformed to a health inequities model – that historically, socially disadvantaged groups had poorer outcomes than Whites. This was less frequent in comparisons between Asians and Whites. In a small, but not negligible proportion of cities, historically disadvantaged race/ethnicity groups had better SDOH outcomes than Whites. We found a correlation between a community's underlying level of poverty (or educational attainment) and racial/ethnic disparities. Neighbourhood level differences within cities were also ubiquitous. On average, a mere 2.6 km separates a city's census tracts with the highest and lowest poverty rate or educational attainment. An illustrative analysis showed that increases in within-city disparities in poverty and educational attainment are associated with reductions in life expectancy, providing support for the relevance of the monitoring of SDOH.

### Strengths and Limitations

To our knowledge, this is the first comprehensive tabulation of pairwise within-city SDOH differences between major race/ethnic groups and neighbourhoods across California's cities.

As a univariate analysis, our findings have several limitations. Racial/ethnic differences may be related to other SDOHs which mediate the outcome. For example, recency of immigration profoundly influences poverty and educational attainment,<sup>11</sup> and may explain, in part, the educational inequities we observed in Latinos and Whites.

Moreover, SDOH are themselves interrelated. Conducting a multivariate analysis to establish the independence of racial/ethnicity disparities,<sup>4</sup> is not feasible using pre-tabulated ACS tables. Other U.S. Census Bureau products (Public Use Microdata Sample) and surveys may serve this purpose, but do not provide reliable estimates at small geographies.

DRAFT

CONFIDENTIAL

14

1  
2  
3  
4  
5 For a small percentage of cities, socially disadvantaged groups had significantly better  
6 outcomes than Whites. Further research of these cities may reveal whether this finding  
7 is associated with community "resiliency", confounded by other sociodemographic  
8 factors, or has another explanation.  
9  
10  
11

12  
13  
14 We acknowledge that the race categories included in the analysis are composed of  
15 subpopulations whose poverty and educational attainment are heterogeneous (for  
16 instance, differences between Asian ethnic groups). Valuable information may have  
17 been lost by aggregation.  
18  
19  
20  
21

22  
23 Differences in SDOH between geographic units such as census tracts may be  
24 disparities or inequities, depending on the history of social disadvantage. Long-standing  
25 patterns of racial discrimination and economic segregation within California cities<sup>12</sup>  
26 undoubtedly underlie some of the differences that we labeled disparities.  
27  
28  
29  
30

31  
32 Data suppression in the ACS impacts numerically small, geographically dispersed  
33 racial/ethnic populations, creating information bias towards areas with greater racial  
34 concentration or segregation. Small rural communities account for a disproportionate  
35 number of exclusions in our analysis. Nonetheless, depending on the race/ethnicity  
36 comparison, the cities included in our analysis contain between 68% and 88% of the  
37 California population.  
38  
39  
40  
41  
42

43  
44 Cross-sectional data cannot be used to establish causal relationships or directionality.  
45 Our finding that a community's poverty rate and its racial/ethnic disparities are  
46 interrelated will require longitudinal, confirmatory studies. Studies in the United States  
47 and western countries suggest that income inequality inhibits overall economic  
48 development and economic mobility.<sup>13</sup>  
49  
50  
51  
52  
53

54  
55 The time period of this study coincided with high levels of economic instability during the  
56 Great Recession, 2007-2009. Cities and regions might have since experienced  
57  
58  
59  
60

1  
2  
3 economic recovery, gentrification, population displacement, and community succession.  
4  
5 Due to lags in reporting, ACS data may not reflect current conditions.  
6  
7  
8  
9  
10

## 11 **What Can Cities Do?**

12  
13  
14  
15  
16 While cities alone cannot be expected to solve economic and educational disparities,  
17 they play an important role in shaping the social determinants of health through people-  
18 and place-based strategies.<sup>14</sup> In the United States local government plays an active  
19 role in recruiting and retaining employers, establishing preferences for minority-owned  
20 businesses, adopting local first-hire policies, and legislating minimum wages. School  
21 districts and boards exert local control over school policy and funding, whether the bulk  
22 of funds are from state or local taxes. Through local zoning, urban revitalization, and the  
23 creation of enterprise zones, local government shapes the built environment and the  
24 availability of resources for the basics of living (e.g., food outlets, housing, jobs,  
25 transportation). Local housing authorities implement federal and state policies that  
26 influence the availability and placement of affordable housing. Several health impact  
27 assessments and health studies document the likely and actual health promoting  
28 impacts of minimum wage ordinances<sup>15, 16</sup> and housing vouchers that relocate renters  
29 from neighbourhoods with concentrated poverty to those with low poverty.<sup>17, 18</sup> Many  
30 cities are examining their own internal policies and practices with regard to hiring,  
31 procurement, and building capacity through authentic deep community engagement.  
32  
33  
34  
35  
36  
37  
38  
39  
40  
41  
42  
43  
44  
45

46 Local elected officials often comprise the governing bodies of regional associations of  
47 government, which make decisions on regional transportation, housing, and economic  
48 investments. Economic development strategies forged at a regional level have a wide  
49 ranging impact at the local level.<sup>19</sup> There is evidence that some strategies that promote  
50 overall regional economic development may exacerbate economic disparities.<sup>20</sup>  
51  
52  
53  
54  
55

## 56 **What Can Local Health Departments Do?**

DRAFT

CONFIDENTIAL

16

## Data and Surveillance

In general, SDOH indicators have not been institutionalised in public health surveillance at the state and local level in the same manner as mortality surveillance, communicable disease reporting, and behavioral risk factor surveillance. Monitoring SDOH geographic variation, time trends, and population subgroups help assess the magnitude of the problem, identify high risk groups, monitor progress toward meeting goals, set priorities, and target resources for intervention. Several U.S. states have offices of health equity, which issue periodic reports.<sup>21, 22</sup> Due to requirements of the Affordable Care Act (ACA), LHDs in partnership with nonprofit hospitals and community coalitions are producing community health needs assessments and improvement plans [US IRS Code Title IX, §6033(b)], frequently framing health disparities in terms of SDOH.<sup>23, 24</sup> ACA implementation supports the institutionalization of surveillance of the SDOH at geographically resolved areas throughout the United States.

Health departments can also use the distribution of within-city inequities to identify specific cities that share socioeconomic and demographic similarities, but differ on health inequities. Fostering exchanges like learning collaboratives or intervention trials between peer cities may be but one mechanism to engage cities and identify successful strategies to reduce inequities.

Some LHDs are taking systematic approaches to link SDOH surveillance data to action in the form of how-to guides,<sup>25</sup> internal capacity building, and setting explicit goals and activities to reduce disparities.<sup>26</sup>

### Internal Capacity Building on Racial and Health Equity

Efforts to examine and counter structural racism in health inequities are being integrated into public health practice by identifying upstream causes,<sup>22 27</sup> and conducting assessments of organizational behavior in health departments. Educational and action-

DRAFT

CONFIDENTIAL

17

oriented workshops, training, and toolkits are increasingly part of public health workforce development, program design, policy development, and evaluation<sup>28, 29</sup> and should touch areas relevant to public health department accreditation.

### Health in All Policies

With the ascendance of Health in All Policies (HiAP),<sup>5</sup> public health departments have opportunities to play an active and direct role in educating policy makers on the SDOH and health equity. Because different sectors may frame equity in profoundly different ways,<sup>30</sup> public health practitioners can convene and constructively engage partners, including those central to economic development and education. HiAP-related actions include health impact assessments, advising and participating in cross-sector planning (e.g., land use, transportation, food systems), and developing tools that non-health planners can use to quantify the health benefits or harms of various policies or programs.<sup>28</sup>

### Service Environment

Overcoming fragmented social services delivery is highly desirable and underpins comprehensive models of service delivery that may have collective impact and address SDOHs.<sup>31,32</sup> Building on city-level data of poverty and educational inequities, health departments can play a role in monitoring and evaluating the equitable access and distribution of services provided by the health department and other social service agencies.

### Conclusions

Racial, ethnic, and geographic disparities in poverty and educational attainment in adults are widespread within and between California cities. Given that public health practice is increasingly focused upstream, surveillance of the social determinants of

DRAFT

CONFIDENTIAL

18

1  
2  
3 health may afford opportunities for engagement with neighbourhoods, cities, and  
4 regional government to be an active partner in strategies that promote health and  
5 reduce poverty and low educational attainment.  
6  
7  
8

### 9 10 **ACKNOWLEDGEMENTS**

11 The authors acknowledge valuable review and comments by Dr. Linda Rudolph and  
12 Brad Jacobsen.  
13  
14

### 15 16 17 **CONTRIBUTORS**

18 DB and NM shared responsibilities in the design, analysis, and write up of this research.  
19  
20  
21

### 22 23 **FUNDING**

24 This research was self-sponsored by the authors and did not receive funding from a  
25 public, commercial or not-for-profit agency. The California Strategic Growth Council and  
26 The California Department of Public Health funded and created the datasets used in this  
27 analysis. The views expressed by the authors are their own and do not necessarily  
28 reflect those of employers or organizations with whom they have/had affiliations.  
29  
30  
31  
32

### 33 34 35 **COMPETING INTERESTS**

36 None declared.  
37  
38  
39

### 40 41 **PROTECTION OF HUMAN SUBJECTS IN RESEARCH**

42 This study used publicly available data and did not involve human subjects in research.  
43  
44

### 45 46 **DATA SHARING STATEMENT**

47 This study used publicly available data. Data sets used in this analysis can be  
48 downloaded from:  
49

50 <http://www.cdph.ca.gov/programs/Pages/HealthyCommunityIndicators.aspx>.  
51  
52  
53  
54  
55  
56  
57  
58  
59  
60

## REFERENCES

- 1 Agency for Healthcare Research and Quality. 2014 National Healthcare Quality and Disparities Report. AHRQ Publication No. 15-0007. Rockville, MD: Agency for Healthcare Research and Quality 2015.
- 2 Centers for Disease Control and Prevention. CDC Health Disparities and Inequalities Report — United States, 2013. *MMWR* 2013;62:Suppl 3.
- 3 National Center for Health Statistics. Health, United States, 2014: With Special Feature on Adults Aged 55–64. Hyattsville, MD: U.S. Department of Health and Human Services 2015.
- 4 Braveman P. What are health disparities and health equity? We need to be clear. *Public Health Rep* 2014;129:(Suppl 2):5-8.
- 5 Rudolph L, Caplan J, Mitchell C, *et al*. Health in All Policies: Improving Health Through Intersectoral Collaboration. Washington, DC: Institute of Medicine 2013.
- 6 U.S. Department of Health and Human Services. Healthy People 2020. Topics & Objectives: Social Determinants of Health. Washington, DC: U.S. Department of Health and Human Services 2015.
- 7 Galea S, Tracy M, Hoggatt K, *et al*. Estimated deaths attributable to social factors in the United States. *Am J Public Health* 2011;101:1456–65.
- 8 U.S. Bureau of Census. American Community Survey: Code Lists, Definitions, and Accuracy. Washington, DC: U.S. Department of Commerce 2014.
- 9 U.S. Bureau of Census. American Community Survey: Design and Methodology. Version 2.0. Washington, DC: U.S. Department of Commerce 2014.
- 10 R Core Team. R: A Language and Environment for Statistical Computing. Vienna, Austria: R Foundation For Statistical Computing 2015.
- 11 Sullivan D, Ziegert A. Hispanic Immigrant Poverty: Does Ethnic Origin Matter? *Pop Res Policy Rev* 2008;27:667-87.
- 12 Iceland J, Weinberg DH, Steinmetz E. Racial and Ethnic Residential Segregation in the United States: 1980-2000. Series CENSR-3. Washington, DC: U.S. Census Bureau 2002.
- 13 Cingano F. Trends in Income Inequality and its Impact on Economic Growth. OECD Social, Employment and Migration Working Papers, No. 163. Paris, France: Organisation for Economic Co-operation and Development Publishing 2014.
- 14 Pastor M, Turner M. Reducing Poverty and Economic Distress after ARRA Potential Roles for Place-conscious Strategies. Washington, DC: Urban Institute 2010.
- 15 Bhatia R, Katz M. Estimation of Health Benefits From a Local Living Wage Ordinance. *Am J Public Health* 2001;91:1398-402.
- 16 Cole BL, Shimkhada R, Morgenstern M, *et al*. Projected health impact of the Los Angeles City living wage ordinance. *J Epidemiol Community Health* 2005;59:645-50.
- 17 Chetty R, Hendren N, Katz L. The Effects of Exposure to Better Neighborhoods on Children: New Evidence from the Moving to Opportunity Experiment. Cambridge, MA: Harvard University and NBER 2015.
- 18 Ludwig J, Sanbonmatsu L, Gennetian L, *et al*. Neighborhoods, obesity, and diabetes — A randomized social experiment. *N Engl J Med* 2011;365:1509-19.
- 19 Porter M. The economic performance of regions. *Regional Studies* 2003;37:549-78.
- 20 Morrill R. Inequality of the largest U.S. metropolitan areas. *New Geography* 9/11/2013.
- 21 Office of Health Equity. Portrait of Promise: The California Statewide Plan to Promote Health and Mental Health Equity. A Report to the Legislature and the People of California by the Office of Health Equity. Sacramento, CA: California Department of Public Health, Office of Health Equity 2015.
- 22 Minnesota Department of Public Health. Advancing Health Equity in Minnesota: Report to the Legislature. St. Paul, MN: Minnesota Department of Public Health 2014.



DRAFT

CONFIDENTIAL

20

- 23 Tulsa Health Department. Community Health Improvement Plan: Pathways to Health. Tulsa, OK: Pathways to Health.org 2014.
- 24 BeHealthyDenver.org. Health of Denver Report: Community Health Assessment. Denver, CO: BeHealthyDenver.org 2014.
- 25 Bay Area Regional Health Inequities Initiative Data Committee. Applying Social Determinants of Health Indicators to Advance Health Equity: A Guide for Local Health Department Epidemiologists and Public Health Professionals. Oakland, CA: Bay Area Regional Health Inequities Initiative 2015.
- 26 Multnomah County Health Department. Health Equity Initiative. A Five Year Reflection: Policy Crosswalk, 2008-2013. Portland, OR: Multnomah County Health Department 2013.
- 27 Gee G, Ford C. Structural racism and health inequities: old issues, new directions. *Du Bois Rev* 2011;8:115-32.
- 28 Nelson J. Racial Equity Toolkit: An Opportunity to Operationalize Equity. Berkeley, CA: Government Alliance on Race and Equity, Haas Institute for a Fair & Inclusive Society, University of California, Berkeley 2015.
- 29 Internal Capacity Committee of BARHII. Local Health Department Organizational Self-Assessment for Addressing Health Inequities: Toolkit and Guide to Implementation. Oakland, CA: Bay Area Regional Health Inequities Initiative 2010.
- 30 Committee on Equity Implications of Evolving Transportation Finance Mechanisms. Equity of Evolving Transportation Finance Mechanisms. Special Report 303. Washington, D.C.: Transportation Research Board 2011.
- 31 Kania J, Kramer M. Collective Impact. *Stanford Social Innovation Review* 2011;Winter.
- 32 Nicholas SW, Jean-Louis B, Ortiz B, et al. Addressing the childhood asthma crisis in Harlem: the Harlem Children's Zone Asthma Initiative. *Amer J Public Health* 2005;95:245-9.



**FIGURES LEGENDS**

**Figure 1.** Distribution of Within-City Differences in (a) Poverty Rate and (b) Low Educational Attainment for Pairwise Comparisons of California Whites, Blacks, Latinos, and Asians, 2006-2010. \*Considering Whites as a socially advantaged reference group, the differences that favor Whites are considered inequities. The legends show the percent of cities in which the  $p_2$  race/ethnicity group has a better outcome and the percent of cities in which the outcome is statistically significant ( $p < 0.1$ ). For instance, "Black-Asian (77%, 31%)" indicates that 77% of the cities in which the comparison is possible have a better outcome for the Asian group and 31% of those cities have a significantly better outcome.

**Figure 2.** Within-City Poverty Rate Differences and Overall City Poverty Rate (a) and Low Educational Attainment and Overall City Low Educational Attainment (b), California Cities, 2006-2010.  $r$  is the Pearson correlation coefficient between within city differences and the overall city value. \*Considering Whites as a socially advantaged reference group, the differences that favor Whites are considered inequities.

**Figure 3.** Distribution of Within-City Differences in the Highest and Lowest Census Tract Rates for Educational Attainment and Poverty, California, 2006-2010.

1  
2  
3  
4  
5  
6  
7  
8  
9  
10  
11  
12  
13  
14  
15  
16  
17  
18  
19  
20  
21  
22  
23  
24  
25  
26  
27  
28  
29  
30  
31  
32  
33  
34  
35  
36  
37  
38  
39  
40  
41  
42  
43  
44  
45  
46  
47  
48  
49  
50  
51  
52  
53  
54  
55  
56  
57  
58  
59  
60



302x170mm (300 x 300 DPI)

review only

1  
2  
3  
4  
5  
6  
7  
8  
9  
10  
11  
12  
13  
14  
15  
16  
17  
18  
19  
20  
21  
22  
23  
24  
25  
26  
27  
28  
29  
30  
31  
32  
33  
34  
35  
36  
37  
38  
39  
40  
41  
42  
43  
44  
45  
46  
47  
48  
49  
50  
51  
52  
53  
54  
55  
56  
57  
58  
59  
60



302x170mm (300 x 300 DPI)

review only

1  
2  
3  
4  
5  
6  
7  
8  
9  
10  
11  
12  
13  
14  
15  
16  
17  
18  
19  
20  
21  
22  
23  
24  
25  
26  
27  
28  
29  
30  
31  
32  
33  
34  
35  
36  
37  
38  
39  
40  
41  
42  
43  
44  
45  
46  
47  
48  
49  
50  
51  
52  
53  
54  
55  
56  
57  
58  
59  
60



216x170mm (300 x 300 DPI)

ew only

1  
2  
3  
4  
5  
6  
7  
8  
9  
10  
11  
12  
13  
14  
15  
16  
17  
18  
19  
20  
21  
22  
23  
24  
25  
26  
27  
28  
29  
30  
31  
32  
33  
34  
35  
36  
37  
38  
39  
40  
41  
42  
43  
44  
45  
46  
47  
48  
49  
50  
51  
52  
53  
54  
55  
56  
57  
58  
59  
60



216x170mm (300 x 300 DPI)



222x170mm (300 x 300 DPI)

ew only

1  
2  
3  
4  
5  
6  
7  
8  
9  
10  
11  
12  
13  
14  
15  
16  
17  
18  
19  
20  
21  
22  
23  
24  
25  
26  
27  
28  
29  
30  
31  
32  
33  
34  
35  
36  
37  
38  
39  
40  
41  
42  
43  
44  
45  
46  
47  
48  
49  
50  
51  
52  
53  
54  
55  
56  
57  
58  
59  
60

# BMJ Open

## Cross Sectional Analysis of the Social Determinants of Health in California Cities: Racial, Ethnic, and Geographic Disparities

|                                 |                                                                                          |
|---------------------------------|------------------------------------------------------------------------------------------|
| Journal:                        | <i>BMJ Open</i>                                                                          |
| Manuscript ID                   | bmjopen-2016-013975.R2                                                                   |
| Article Type:                   | Research                                                                                 |
| Date Submitted by the Author:   | 05-Feb-2017                                                                              |
| Complete List of Authors:       | Bustamante, Dulce<br>Maizlish, Neil                                                      |
| <b>Primary Subject Heading</b>: | Public health                                                                            |
| Secondary Subject Heading:      | Epidemiology, Health policy, Public health                                               |
| Keywords:                       | EPIDEMIOLOGY, PUBLIC HEALTH, Health policy < HEALTH SERVICES ADMINISTRATION & MANAGEMENT |
|                                 |                                                                                          |

SCHOLARONE™  
Manuscripts

1  
2  
3  
4  
5  
6  
7  
8  
9 Title: **Cross Sectional Analysis of the Social Determinants of Health**  
10 **in California Cities: Racial, Ethnic, and Geographic Disparities**  
11  
12  
13

14  
15  
16 Authors: Dulce Bustamante-Zamora, PhD  
17 1126 Cherry Ave #56, San Bruno, California, 94066,USA  
18 [dulce\\_mariab@hotmail.com](mailto:dulce_mariab@hotmail.com)  
19 Tel. (650) 730-0329  
20

21 Corresponding Author: Neil Maizlish, PhD, MPH  
22 1226 Carlotta Ave, Berkeley, California, 94707, USA  
23 [neil3971@comcast.net](mailto:neil3971@comcast.net)  
24 Tel. (510) 525-4939  
25  
26  
27  
28

29 Key Words: health inequity, health disparity, poverty, educational attainment, race/ethnicity,  
30 neighbourhood  
31

32  
33 Word Count: 3,436  
34  
35  
36  
37  
38  
39  
40  
41  
42  
43  
44  
45  
46  
47  
48  
49  
50  
51  
52  
53  
54  
55  
56  
57  
58  
59  
60



## ABSTRACT

### Objective

To study the magnitude and direction of city level racial and ethnic differences in poverty and education to examine health equity and social determinants of health in California cities.

### Design

We used data from the American Community Survey, United States Census Bureau, 2006-2010, and calculated differences in the prevalence of poverty and low educational attainment in adults by race/ethnicity and by census tracts within California cities. For race/ethnicity comparisons, when the referent group ( $p_2$ ) to calculate the difference ( $p_1 - p_2$ ) was the non-Hispanic White population (considered a historically advantaged group), a positive difference was considered a health inequity. Differences with a non-White reference group were considered health disparities.

### Setting

Cities of the State of California, United States.

### Results

Within-city differences in the prevalence of poverty and low educational attainment disfavored Black and Latinos compared to Whites in over 78% of cities. Compared to Whites, the median within-city poverty difference was 7.0% for Latinos and 6.2% for Blacks. For education, median within-city difference was 26.6% for Latinos compared to Whites. In a small, but not negligible proportion of cities, historically disadvantaged race/ethnicity groups had better social determinants of health outcomes than Whites. The median difference between the highest and lowest census tracts within cities was 14.3% for poverty and 15.7% for low educational attainment. Overall city poverty rate was weakly, but positively correlated with within-city racial/ethnic differences.

### Conclusions

1  
2  
3 Disparities and inequities are widespread in California. Local health departments can  
4 use these findings to partner with cities in their jurisdiction and design strategies to  
5 reduce racial, ethnic and geographic differences in economic and educational  
6 outcomes. These analytic methods could be used in a surveillance system to monitor  
7 these determinants of health.  
8  
9  
10  
11  
12  
13  
14  
15  
16  
17  
18  
19  
20  
21  
22  
23  
24  
25  
26  
27  
28  
29  
30  
31  
32  
33  
34  
35  
36  
37  
38  
39  
40  
41  
42  
43  
44  
45  
46  
47  
48  
49  
50  
51  
52  
53  
54  
55  
56  
57  
58  
59  
60

## ARTICLE SUMMARY

### STRENGTHS AND LIMITATIONS OF THIS STUDY

- To our knowledge, this is the first comprehensive tabulation of pairwise within-city SDOH differences between major race/ethnic groups and neighbourhoods across California's cities.
- Most multi-level, place-based research, examines individual and neighborhood impacts, but often bypasses city as a "place": racial and ethnic differences in health outcomes and their social determinants are widely reported in the United States at the national, state, and county scale, with non-Hispanic White populations usually experiencing the best outcomes.
- This article contributes to fill a geographic gap in current public health surveillance methods by documenting the glaring disparities in poverty and low educational attainment by race/ethnicity and neighborhood that exist within nearly every California city.
- This analysis provides both between and within city-level estimates that can be more effective for targeting interventions to where they are most needed.
- As a univariate analysis, our findings have several limitations including lack of examination of other social determinants that could mediate the outcomes, time period of the study that coincides with high levels of economic instability during the Great Recession, 2007-2009, and use of aggregated data that masks the heterogeneity of sub-populations within the racial and ethnic groups studied.

## INTRODUCTION

Differences in health outcomes or their determinants are widely reported between racial and ethnic groups in the United States at the national, state, and county scale.<sup>1-3</sup>

Differences that are avoidable, unfair and rooted in historical social disadvantage are defined as health inequities. Differences with biological or other underlying causes are health disparities.<sup>4</sup> County and city local health departments (LHDs) increasingly recognise their role in addressing the social determinants of health (SDOH) that underlie health inequities. LHDs are also reaching out to non-health sectors in their communities to impact the root causes of health inequities through "Health in All Policies".<sup>5</sup>

Geographic analysis of SDOH is used to reveal health inequities, and prioritise public health interventions and target community engagement. While an increasing number of LHDs examine health inequities at small geographies, most rely on county level data that masks important differences within counties. The surveillance of SDOH at small geographies poses methodological challenges and opportunities for taking data to action. In assessing racial and ethnic inequities, non-Hispanic Whites are often considered the socially advantaged referent group. It has been posited that it is relatively rare for the most privileged group not to have the best outcome.<sup>4, p187</sup>

We explore racial, ethnic, and geographic differences in poverty and low educational attainment. Poverty reduction, increasing educational attainment, and the elimination of health disparities are national health goals of the United States<sup>6</sup>; these two SDOH may account for 18% of the national burden of mortality.<sup>7</sup>

We examined 1) the magnitude and direction of racial, ethnic and geographical differences in these SDOH within and between California cities, 2) the relationship between overall city disadvantage and SDOH disparities and inequities, and 3) possible actions that LHDs may consider based on surveillance findings produced with the research methods suggested in this study.

## METHODS

### Data Source

We used data from the American Community Survey (ACS),<sup>8,9</sup> a continuous prevalence survey based on a probability sample of households throughout the United States. ACS publishes data in 5-year tabulations for cities and census tracts. We used ACS Selected Population Tables (2006-2010), which stratify the tabulations by mutually exclusive race and ethnicity categories: Hispanic or Latino, and non-Hispanic persons of the following races: White, Black, Asian, Native Hawaiian and Other Pacific Islander, Other, Multiple, and American Indian/Alaskan Native. For California, the ACS reported on 8,057 census tracts, 480 incorporated cities and towns, and 1,043 non-incorporated places (from here on towns and non-incorporated places will be referred on as cities). The prevalence of poverty and its standard error were obtained from ACS Table DP03, and educational attainment in adults and its standard error were obtained from Table DP02. The California Department of Public Health compiled these data ([www.cdph.ca.gov/programs/pages/healthycommunityindicators.aspx](http://www.cdph.ca.gov/programs/pages/healthycommunityindicators.aspx)).

### ACS Definition of Poverty and Educational Attainment

The prevalence of poverty was defined as the 5-year annual average percentage of all individuals whose household income in the past 12 months was below the federal poverty level. Total household income was calculated from eight questions on the ACS-1 form about wages, self-employment, securities, rental property, retirement and disability payments, and public assistance. Households were classified as poor when total income of the householder's family was below an income threshold, taking into account the size of the family, number of related children, and, for 1- and 2-person families, age of householder.<sup>8</sup> The prevalence of educational attainment less than high school was defined as the 5-year annual average percentage of adults aged 25 years or older whose maximum educational attainment was 0 to 11 years of grade school.

## Between-City, Within-City, and Neighbourhood Level Racial and Ethnic Disparities and Inequities and Statistical Methods

We calculated between-city, within-city, and neighbourhood level differences for combinations of White, Asian, Latino, and Black subgroups.

Differences in the 5-year percentage of poverty or low educational attainment,  $p$ , were calculated between pairs of racial/ethnic groups,  $p_1 - p_2$ . Differences have a positive or negative sign based on the referent group ( $p_2$ ). When the referent group,  $p_2$ , was White, a positive difference represents a health inequity. Differences with a non-White reference group were considered health disparities. For cities with two or more census tracts, neighbourhood disparities were defined as the absolute difference of census tracts with the highest and lowest 5-year percentage.

Mean and medians of between- and within-city differences and their standard deviation were calculated. The between-city mean difference was defined as the difference of the mean prevalence of two specified race/ethnicity groups across all cities:

$$\text{Between - city mean difference} = \frac{\sum_{i,j} p_{i,j}}{N_{\text{Total}(j)}} - \frac{\sum_{i,k} p_{i+1,k}}{N_{\text{Total}(k)}}$$

where  $i$  is the  $i^{\text{th}}$  race/ethnicity group and  $j$  is the  $j^{\text{th}}$  of  $N$  total cities of group  $i$ , and  $k$  is the  $k^{\text{th}}$  of  $N$  total cities of group  $i+1$ .

The within-city mean difference was defined as:

$$\text{Within - city mean difference} = \frac{\sum_{i,j} (p_{i,j} - p_{i+1,j})}{N_{\text{Total}(j)}}$$

where  $i$  is the  $i^{\text{th}}$  race/ethnicity group and  $j$  is the  $j^{\text{th}}$  of city of  $N_{\text{Total}}$  cities where data on both of the race/ethnicity pairs are available.

1  
2  
3  
4  
5  
6  
7  
8  
9  
10  
11  
12  
13  
14  
15  
16  
17  
18  
19  
20  
21  
22  
23  
24  
25  
26  
27  
28  
29  
30  
31  
32  
33  
34  
35  
36  
37  
38  
39  
40  
41  
42  
43  
44  
45  
46  
47  
48  
49  
50  
51  
52  
53  
54  
55  
56  
57  
58  
59  
60

Within-city differences were plotted as cumulative frequency distributions of cities for each pairwise race/ethnicity comparison in order to assess the magnitude and direction of racial and ethnic inequities or disparities in cities across the state. For each city, Z-tests were carried out to determine whether the within-city difference was statistically significant. We followed U.S. Census Bureau guidelines for pooling standard errors of percents, which is the square root of the sum of the squares of the two individual standard errors ( $se = \sqrt{se_1^2 + se_2^2}$ ). A p value of 0.10 was considered statistically significant. R software was used for the calculations.<sup>10</sup>

SDOH differences are often interpreted in the context of the range of their absolute values. For example, in some very poor cities there may be no demonstrable differences between groups and "everyone is poor together". In other cities, there is a small, but statistically significantly difference between groups, but each group is relatively well off (e.g., has a SDOH value far above the mean.) To contextualise a city's disparities or inequities on a backdrop of high or low rate of poverty or educational attainment, we plotted within-city disparities or inequities, as a function of the between-city poverty rate (or educational attainment). Simple linear correlation (Pearson, r) assessed the strength of association.

### Calculation of Neighbourhood Disparities

Census tract and city boundaries are not always congruent; therefore, for neighbourhood analyses, census tracts were associated with the city into which its centroid fell. We used ArcGIS 10.3 (ESRI, Redlands, CA) to calculate and associate centroids with cities. In some cases, portions of census tracts outside of city limits were included in neighbourhood comparisons. This introduces some potential misclassification if the outlying portion of the census tract has different poverty or educational attainment. We also calculated the mean linear distance in miles between the centroids of the census tracts with the highest and lowest poverty and educational outcomes.

## Exclusions

The ACS does not publish data for geographic areas with fewer than 50 respondents. Of 1,523 cities the number available for within-city pairwise comparisons varied by race/ethnicity subgroup: 221 cities had data for Black-Asian comparisons, 280 for Asian-White, 245 for Black-White, 364 for Latino-Asian, 252 for Latino-Black, and 611 for Latino-White. We did not have sufficient data to carry out pairwise comparisons that included American Indian/Native Alaskans, Native Hawaiians and Other Pacific Islanders, Multiple races, and Other. Analyses of poverty at the census tract level excluded economically dependent populations in colleges, correctional facilities, and other group quarters and institutions. Two census tracts with a population less than 500 inhabitants were also excluded.

## Association between Within-City Geographic Disparities in Educational Attainment and Poverty with Within-City Disparities in Life Expectancy at Birth

To illustrate the association between SDOH and health outcomes within California cities we calculated the correlation coefficient between census tract level life expectancy at birth (LEB) and the two social determinants. The LEB data for California census tracts is publically available through the Health Disadvantage Index Project (<http://phasocal.org/ca-hdi/>). The census tracts with the highest and lowest education attainment and those with the highest and lowest poverty rates were matched with their LEB. Within cities, the differences between minimum and maximum (min-max) SDOH and health outcomes, respectively, was calculated. Census tract differences in educational attainment and poverty were scaled so that positive differences indicated greater disparities. Census tract difference in LEB were scaled so that positive differences indicated increases in life expectancy, and conversely, negative differences indicated a lower life expectancy. The correlation coefficient between the differences (min-max) was calculated in R.



## RESULTS

### Between- and Within-City Racial and Ethnic Disparities and Inequities

The poverty rate of Latinos (18.6%) and Blacks (17.4%) averaged over California cities was nearly twice that of Whites (9.2%) and Asians (9.5%) (Table 1).

**Table 1** Between and Within-City Means and Race-Ethnicity Specific Pairwise Differences in Poverty Rate and Educational Attainment, California, 2006-2010

|                                                        | Percent below the federal poverty level |        |             | Percent of adults aged $\geq 25$ years without a high school education |              |        |             |        |
|--------------------------------------------------------|-----------------------------------------|--------|-------------|------------------------------------------------------------------------|--------------|--------|-------------|--------|
|                                                        | Mean                                    | SD     | Median      | Mean                                                                   | SD           | Median |             |        |
| Between cities                                         |                                         |        |             |                                                                        |              |        |             |        |
| White                                                  | 9.2                                     | 6.9    | 7.5         | 8.7                                                                    | 7.3          | 6.7    |             |        |
| Black                                                  | 17.4                                    | 12.9   | 14.6        | 11.0                                                                   | 8.9          | 8.8    |             |        |
| Asian                                                  | 9.5                                     | 8.7    | 7.1         | 12.4                                                                   | 9.8          | 9.7    |             |        |
| Latino                                                 | 18.6                                    | 11.4   | 16.8        | 39.6                                                                   | 18.4         | 39.9   |             |        |
| Pairwise differences (p <sub>1</sub> -p <sub>2</sub> ) | Between city                            |        | Within city |                                                                        | Between city |        | Within city |        |
|                                                        | Mean                                    | Median | Mean        | Median                                                                 | Mean         | Median | Mean        | Median |
| Black-White                                            | 8.2                                     | 7.1    | 8.5         | 6.2                                                                    | 2.3          | 2.1    | 2.0         | 0.6    |
| Asian-White                                            | 0.3                                     | -0.4   | 1.7         | 0.9                                                                    | 3.7          | 3.0    | 4.4         | 2.7    |
| Latino-White                                           | 9.4                                     | 9.3    | 7.6         | 7.0                                                                    | 30.9         | 33.2   | 26.2        | 26.6   |
| Black-Asian                                            | 7.9                                     | 7.5    | 6.5         | 4.8                                                                    | -1.4         | -0.9   | -3.3        | -3.1   |
| Latino-Asian                                           | 9.1                                     | 9.7    | 5.1         | 4.8                                                                    | 27.2         | 30.2   | 19.0        | 19.2   |
| Latino-Black                                           | 1.2                                     | 2.2    | 0.3         | 0.5                                                                    | 28.6         | 31.1   | 24.9        | 25.4   |

DRAFT

CONFIDENTIAL

11

1  
2  
3 The city average percentage of adults with low educational attainment was 3-4 times  
4 higher in Latinos compared to Whites, Asians, or Blacks. The largest mean between-  
5 city educational inequity (30.9%) was between Latinos and Whites.  
6  
7  
8  
9

10 The distribution of within-city differences of race/ethnicity pairs is presented for poverty  
11 and low educational attainment (Figure 1). In a large percentage of cities, Asians and  
12 Whites had better poverty outcomes than Latinos or Blacks. The largest inequities  
13 occurred between Blacks and Whites (8.5% mean difference) and Latinos and Whites  
14 (7.6%). In approximately 40% of cities, these differences were statistically significant.  
15 Latinos had better poverty outcomes than Asians or Whites in 26% and 18% of cities,  
16 respectively. Likewise, Blacks had better outcomes than Asians or Whites in  
17 approximately 20% of cities. The average differences in within-city poverty rates  
18 between Blacks and Latinos were small (0.3%), but there was considerable variation.  
19  
20  
21  
22  
23  
24  
25  
26  
27

28 For low educational attainment (Figure 1 b), the largest mean difference was between  
29 Latinos and other groups (Latino-Whites, 26.2%; Latino-Blacks, 24.9%; Latino-Asians,  
30 19.0%). Whites tended to have better outcomes than Asians or Blacks. Blacks tended to  
31 have better outcomes than Asians. Latinos had poorer outcomes than the other groups  
32 in almost all cities (94% or higher). An overwhelming majority of within-city differences  
33 between Latinos and other groups were statistically significant.  
34  
35  
36  
37  
38  
39  
40

41 Supplemental materials include maps of California cities depicting the race/ethnicity with  
42 the largest disparity for poverty or educational attainment.  
43  
44

### 45 **Between- and Within-City Racial and Ethnicity Correlations**

46  
47

48 Within-city racial/ethnic differences in poverty and overall city poverty rate (Figure 2 a),  
49 appear to be correlated for all race/ethnicity combinations with White or Asian referents,  
50 but exhibit considerable variability (scatter). Black and Latino inequities (White  
51 referents) tended to be larger at higher levels of overall poverty ( $r = 0.37$ ,  $P < 0.01$ ). A  
52  
53  
54  
55  
56  
57  
58  
59  
60

DRAFT

CONFIDENTIAL

12

1  
2  
3 weaker association ( $r = 0.20$ ,  $P < 0.01$ ) was observed for Black or Latinos with Asian  
4 referents.  
5  
6

7  
8  
9 In a large proportion of California cities, Latinos experience both large educational  
10 disparities and live in cities with low overall educational attainment. Within-city  
11 education differences between Latinos and other groups were strongly associated ( $r$   
12 range: 0.48 to 0.60) with overall city low educational attainment (Figure 2 b).  
13  
14

### 15 16 17 **Neighbourhood Disparities** 18

19  
20  
21 The distribution of within-city differences of poverty and educational attainment between  
22 the highest and lowest census tract is presented in Figure 3. The median difference was  
23 14.3% for poverty and 15.7% for educational attainment. Disparities of 25% or greater  
24 were observed in 25% of cities for poverty and 33% of cities for educational attainment.  
25  
26 In approximately 73% of 500 cities with two or more census tracts, the differences were  
27 statistically significant. For the 174 cities with 10 or more census tracts, 99% of  
28 differences were statistically significant. The median straight-line distance between the  
29 highest and lowest census tracts was 2.6 km (SD, 3.2) for poverty and 2.9 km (SD,  
30 3.04) for educational attainment.  
31  
32  
33  
34  
35  
36  
37

### 38 39 **Within-City Associations between Disparities in Life Expectancy at Birth and** 40 **Disparities in the SDOH** 41

42  
43  
44 Within cities, increasing disparities in educational attainment between census tracts with  
45 the highest and lowest levels were significantly correlated with increasing disparities in  
46 which life expectancy decreased (Pearson  $r = -0.24$ ,  $p < 0.001$ ). A similar significant  
47 correlation was found for poverty disparities and life expectancy (Pearson  $r = -0.28$ ). In  
48 simple linear regression analyses, 0.08 years of life expectancy was lost for each  
49 percent of educational disparity and 0.05 years of life expectancy was lost for each  
50 percent of poverty disparity.  
51  
52  
53  
54  
55  
56  
57  
58  
59  
60

DRAFT

CONFIDENTIAL

13

## DISCUSSION

We found widespread racial, ethnic, and geographic differences in educational attainment and poverty within California cities. Comparisons between Whites and Blacks and Whites and Latinos generally conformed to a health inequities model – that historically, socially disadvantaged groups had poorer outcomes than Whites. This was less frequent in comparisons between Asians and Whites. In a small, but not negligible proportion of cities, historically disadvantaged race/ethnicity groups had better SDOH outcomes than Whites. We found a correlation between a city's underlying level of poverty (or educational attainment) and racial/ethnic disparities. Neighbourhood level differences within cities were also ubiquitous. On average, a mere 2.6 km separates a city's census tracts with the highest and lowest poverty rate or educational attainment. An illustrative analysis showed that increases in within-city disparities in poverty and educational attainment are associated with reductions in life expectancy, providing support for the relevance of the monitoring of SDOH.

### Strengths and Limitations

To our knowledge, this is the first comprehensive tabulation of pairwise within-city SDOH differences between major race/ethnic groups and neighbourhoods across California's cities.

As a univariate analysis, our findings have several limitations. Racial/ethnic differences may be related to other SDOHs which mediate the outcome. For example, recency of immigration profoundly influences poverty and educational attainment,<sup>11</sup> and may explain, in part, the educational inequities we observed in Latinos and Whites.

Moreover, SDOH are themselves interrelated. Conducting a multivariate analysis to establish the independence of racial/ethnicity disparities,<sup>4</sup> is not feasible using pre-tabulated ACS tables. Other U.S. Census Bureau products (Public Use Microdata Sample) and surveys may serve this purpose, but do not provide reliable estimates at small geographies.

DRAFT

CONFIDENTIAL

14

1  
2  
3  
4  
5 For a small percentage of cities, socially disadvantaged groups had significantly better  
6 outcomes than Whites. Further research of these cities may reveal whether this finding  
7 is associated with community "resiliency", confounded by other sociodemographic  
8 factors, or has another explanation.  
9  
10  
11

12  
13  
14 We acknowledge that the race categories included in the analysis are composed of  
15 subpopulations whose poverty and educational attainment are heterogeneous (for  
16 instance, differences between Asian ethnic groups). Valuable information may have  
17 been lost by aggregation.  
18  
19  
20  
21

22  
23 Differences in SDOH between geographic units such as census tracts may be  
24 disparities or inequities, depending on the history of social disadvantage. Long-standing  
25 patterns of racial discrimination and economic segregation within California cities<sup>12</sup>  
26 undoubtedly underlie some of the differences that we labeled disparities.  
27  
28  
29  
30

31  
32 Data suppression in the ACS impacts numerically small, geographically dispersed  
33 racial/ethnic populations, creating information bias towards areas with greater racial  
34 concentration or segregation. Small rural cities account for a disproportionate number of  
35 exclusions in our analysis. Nonetheless, depending on the race/ethnicity comparison,  
36 the cities included in our analysis contain between 68% and 88% of the California  
37 population.  
38  
39  
40  
41  
42

43  
44 Cross-sectional data cannot be used to establish causal relationships or directionality.  
45 Our finding that a city's poverty rate and its racial/ethnic disparities are interrelated will  
46 require longitudinal, confirmatory studies. Studies in the United States and western  
47 countries suggest that income inequality inhibits overall economic development and  
48 economic mobility.<sup>13</sup>  
49  
50  
51  
52  
53

54  
55 The time period of this study coincided with high levels of economic instability during the  
56 Great Recession, 2007-2009. Cities and regions might have since experienced  
57  
58  
59  
60

DRAFT

CONFIDENTIAL

15

1  
2  
3 economic recovery, gentrification, population displacement, and community succession.  
4  
5 Due to lags in reporting, ACS data may not reflect current conditions.  
6  
7

## 8 9 **What Can Cities Do?**

10  
11  
12 While cities alone cannot be expected to solve economic and educational disparities,  
13 they play an important role in shaping the social determinants of health through people-  
14 and place-based strategies.<sup>14</sup> In the United States local government plays an active  
15 role in recruiting and retaining employers, establishing preferences for minority-owned  
16 businesses, adopting local first-hire policies, and legislating minimum wages. School  
17 districts and boards exert local control over school policy and funding, whether the bulk  
18 of funds are from state or local taxes. Through local zoning, urban revitalization, and the  
19 creation of enterprise zones, local government shapes the built environment and the  
20 availability of resources for the basics of living (e.g., food outlets, housing, jobs,  
21 transportation). Local housing authorities implement federal and state policies that  
22 influence the availability and placement of affordable housing. Several health impact  
23 assessments and health studies document the likely and actual health promoting  
24 impacts of minimum wage ordinances<sup>15, 16</sup> and housing vouchers that relocate renters  
25 from neighbourhoods with concentrated poverty to those with low poverty.<sup>17, 18</sup> Many  
26 cities are examining their own internal policies and practices with regard to hiring,  
27 procurement, and building capacity through authentic deep community engagement.  
28  
29  
30  
31  
32  
33  
34  
35  
36  
37  
38  
39  
40  
41

42  
43 Local elected officials often comprise the governing bodies of regional associations of  
44 government, which make decisions on regional transportation, housing, and economic  
45 investments. Economic development strategies forged at a regional level have a wide  
46 ranging impact at the local level.<sup>19</sup> There is evidence that some strategies that promote  
47 overall regional economic development may exacerbate economic disparities.<sup>20</sup>  
48  
49  
50  
51  
52

## 53 **What Can Local Health Departments Do?**

54  
55  
56 Data and Surveillance  
57  
58  
59  
60

DRAFT

CONFIDENTIAL

16

1  
2  
3  
4  
5 In general, SDOH indicators have not been institutionalised in public health surveillance  
6 at the state and local level in the same manner as mortality surveillance, communicable  
7 disease reporting, and behavioral risk factor surveillance. Monitoring SDOH geographic  
8 variation, time trends, and population subgroups help assess the magnitude of the  
9 problem, identify high risk groups, monitor progress toward meeting goals, set priorities,  
10 and target resources for intervention. Several U.S. states have offices of health equity,  
11 which issue periodic reports.<sup>21, 22</sup> Due to requirements of the Affordable Care Act (ACA),  
12 LHDs in partnership with nonprofit hospitals and community coalitions are producing  
13 community health needs assessments and improvement plans [US IRS Code Title IX,  
14 §6033(b)], frequently framing health disparities in terms of SDOH.<sup>23, 24</sup> ACA  
15 implementation supports the institutionalization of surveillance of the SDOH at  
16 geographically resolved areas throughout the United States.  
17  
18  
19  
20  
21  
22  
23  
24  
25  
26  
27

28 Health departments can also use the distribution of within-city inequities to identify  
29 specific cities that share socioeconomic and demographic similarities, but differ on  
30 health inequities. Fostering exchanges like learning collaboratives or intervention trials  
31 between peer cities may be but one mechanism to engage cities and identify successful  
32 strategies to reduce inequities.  
33  
34  
35  
36  
37  
38

39 Some LHDs are taking systematic approaches to link SDOH surveillance data to action  
40 in the form of how-to guides,<sup>25</sup> internal capacity building, and setting explicit goals and  
41 activities to reduce disparities.<sup>26</sup>  
42  
43  
44  
45

#### 46 Internal Capacity Building on Racial and Health Equity

47  
48

49 Efforts to examine and counter structural racism in health inequities are being integrated  
50 into public health practice by identifying upstream causes,<sup>22 27</sup> and conducting  
51 assessments of organizational behavior in health departments. Educational and action-  
52 oriented workshops, training, and toolkits are increasingly part of public health  
53  
54  
55  
56  
57  
58  
59  
60



DRAFT

CONFIDENTIAL

17

1  
2  
3 workforce development, program design, policy development, and evaluation<sup>28, 29</sup> and  
4 should touch areas relevant to public health department accreditation.  
5  
6  
7

## 8 9 Health in All Policies

10  
11 With the ascendance of Health in All Policies (HiAP),<sup>5</sup> public health departments have  
12 opportunities to play an active and direct role in educating policy makers on the SDOH  
13 and health equity. Because different sectors may frame equity in profoundly different  
14 ways,<sup>30</sup> public health practitioners can convene and constructively engage partners,  
15 including those central to economic development and education. HiAP-related actions  
16 include health impact assessments, advising and participating in cross-sector planning  
17 (e.g., land use, transportation, food systems), and developing tools that non-health  
18 planners can use to quantify the health benefits or harms of various policies or  
19 programs.<sup>28</sup>  
20  
21  
22  
23  
24  
25  
26  
27  
28  
29

## 30 Service Environment

31  
32  
33 Overcoming fragmented social services delivery is highly desirable and underpins  
34 comprehensive models of service delivery that may have collective impact and address  
35 SDOHs.<sup>31,32</sup> Building on city-level data of poverty and educational inequities, health  
36 departments can play a role in monitoring and evaluating the equitable access and  
37 distribution of services provided by the health department and other social service  
38 agencies.  
39  
40  
41  
42  
43  
44

## 45 Conclusions

46  
47  
48 Racial, ethnic, and geographic disparities in poverty and educational attainment in  
49 adults are widespread within and between California cities. Given that public health  
50 practice is increasingly focused upstream, surveillance of the social determinants of  
51 health may afford opportunities for engagement with neighbourhoods, cities, and  
52  
53  
54  
55  
56  
57  
58  
59  
60



DRAFT

CONFIDENTIAL

18

1  
2  
3 regional government to be an active partner in strategies that promote health and  
4 reduce poverty and low educational attainment.  
5  
6  
7

### 8 **ACKNOWLEDGEMENTS**

9  
10 The authors acknowledge valuable review and comments by Dr. Linda Rudolph and  
11 Brad Jacobsen.  
12  
13

### 14 **CONTRIBUTORS**

15  
16 DB and NM shared responsibilities in the design, analysis, and write up of this research.  
17  
18  
19

### 20 **FUNDING**

21  
22 This research was self-sponsored by the authors and did not receive funding from a  
23 public, commercial or not-for-profit agency. The California Strategic Growth Council and  
24 The California Department of Public Health funded and created the datasets used in this  
25 analysis. The views expressed by the authors are their own and do not necessarily  
26 reflect those of employers or organizations with whom they have/had affiliations.  
27  
28  
29  
30  
31

### 32 **COMPETING INTERESTS**

33  
34 None declared.  
35  
36  
37

### 38 **PROTECTION OF HUMAN SUBJECTS IN RESEARCH**

39  
40 This study used publicly available data and did not involve human subjects in research.  
41  
42

### 43 **DATA SHARING STATEMENT**

44  
45 This study used publicly available data. Data sets used in this analysis can be  
46 downloaded from:  
47

48 <http://www.cdph.ca.gov/programs/Pages/HealthyCommunityIndicators.aspx>.  
49  
50  
51  
52  
53  
54  
55  
56  
57  
58  
59  
60

## REFERENCES

- 1 Agency for Healthcare Research and Quality. 2014 National Healthcare Quality and Disparities Report. AHRQ Publication No. 15-0007. Rockville, MD: Agency for Healthcare Research and Quality 2015.
- 2 Centers for Disease Control and Prevention. CDC Health Disparities and Inequalities Report — United States, 2013. *MMWR* 2013;62:Suppl 3.
- 3 National Center for Health Statistics. Health, United States, 2014: With Special Feature on Adults Aged 55–64. Hyattsville, MD: U.S. Department of Health and Human Services 2015.
- 4 Braveman P. What are health disparities and health equity? We need to be clear. *Public Health Rep* 2014;129:(Suppl 2):5-8.
- 5 Rudolph L, Caplan J, Mitchell C, *et al*. Health in All Policies: Improving Health Through Intersectoral Collaboration. Washington, DC: Institute of Medicine 2013.
- 6 U.S. Department of Health and Human Services. Healthy People 2020. Topics & Objectives: Social Determinants of Health. Washington, DC: U.S. Department of Health and Human Services 2015.
- 7 Galea S, Tracy M, Hoggatt K, *et al*. Estimated deaths attributable to social factors in the United States. *Am J Public Health* 2011;101:1456–65.
- 8 U.S. Bureau of Census. American Community Survey: Code Lists, Definitions, and Accuracy. Washington, DC: U.S. Department of Commerce 2014.
- 9 U.S. Bureau of Census. American Community Survey: Design and Methodology. Version 2.0. Washington, DC: U.S. Department of Commerce 2014.
- 10 R Core Team. R: A Language and Environment for Statistical Computing. Vienna, Austria: R Foundation For Statistical Computing 2015.
- 11 Sullivan D, Ziegert A. Hispanic Immigrant Poverty: Does Ethnic Origin Matter? *Pop Res Policy Rev* 2008;27:667-87.
- 12 Iceland J, Weinberg DH, Steinmetz E. Racial and Ethnic Residential Segregation in the United States: 1980-2000. Series CENSR-3. Washington, DC: U.S. Census Bureau 2002.
- 13 Cingano F. Trends in Income Inequality and its Impact on Economic Growth. OECD Social, Employment and Migration Working Papers, No. 163. Paris, France: Organisation for Economic Co-operation and Development Publishing 2014.
- 14 Pastor M, Turner M. Reducing Poverty and Economic Distress after ARRA Potential Roles for Place-conscious Strategies. Washington, DC: Urban Institute 2010.
- 15 Bhatia R, Katz M. Estimation of Health Benefits From a Local Living Wage Ordinance. *Am J Public Health* 2001;91:1398-402.
- 16 Cole BL, Shimkhada R, Morgenstern M, *et al*. Projected health impact of the Los Angeles City living wage ordinance. *J Epidemiol Community Health* 2005;59:645-50.
- 17 Chetty R, Hendren N, Katz L. The Effects of Exposure to Better Neighborhoods on Children: New Evidence from the Moving to Opportunity Experiment. Cambridge, MA: Harvard University and NBER 2015.
- 18 Ludwig J, Sanbonmatsu L, Gennetian L, *et al*. Neighborhoods, obesity, and diabetes — A randomized social experiment. *N Engl J Med* 2011;365:1509-19.
- 19 Porter M. The economic performance of regions. *Regional Studies* 2003;37:549-78.
- 20 Morrill R. Inequality of the largest U.S. metropolitan areas. *New Geography* 9/11/2013.
- 21 Office of Health Equity. Portrait of Promise: The California Statewide Plan to Promote Health and Mental Health Equity. A Report to the Legislature and the People of California by the Office of Health Equity. Sacramento, CA: California Department of Public Health, Office of Health Equity 2015.
- 22 Minnesota Department of Public Health. Advancing Health Equity in Minnesota: Report to the Legislature. St. Paul, MN: Minnesota Department of Public Health 2014.

DRAFT

CONFIDENTIAL

20

- 1  
2  
3 23 Tulsa Health Department. Community Health Improvement Plan: Pathways to Health. Tulsa,  
4 OK: Pathways to Health.org 2014.  
5 24 BeHealthyDenver.org. Health of Denver Report: Community Health Assessment. Denver,  
6 CO: BeHealthyDenver.org 2014.  
7 25 Bay Area Regional Health Inequities Initiative Data Committee. Applying Social  
8 Determinants of Health Indicators to Advance Health Equity: A Guide for Local Health  
9 Department Epidemiologists and Public Health Professionals. Oakland, CA: Bay Area  
10 Regional Health Inequities Initiative 2015.  
11 26 Multnomah County Health Department. Health Equity Initiative. A Five Year Reflection:  
12 Policy Crosswalk, 2008-2013. Portland, OR: Multnomah County Health Department 2013.  
13 27 Gee G, Ford C. Structural racism and health inequities: old issues, new directions. *Du Bois*  
14 *Rev* 2011;8:115-32.  
15 28 Nelson J. Racial Equity Toolkit: An Opportunity to Operationalize Equity. Berkeley, CA:  
16 Government Alliance on Race and Equity, Haas Institute for a Fair & Inclusive Society,  
17 University of California, Berkeley 2015.  
18 29 Internal Capacity Committee of BARHII. Local Health Department Organizational Self-  
19 Assessment for Addressing Health Inequities: Toolkit and Guide to Implementation.  
20 Oakland, CA: Bay Area Regional Health Inequities Initiative 2010.  
21 30 Committee on Equity Implications of Evolving Transportation Finance Mechanisms. Equity of  
22 Evolving Transportation Finance Mechanisms. Special Report 303. Washington, D.C.:  
23 Transportation Research Board 2011.  
24 31 Kania J, Kramer M. Collective Impact. *Stanford Social Innovation Review* 2011;Winter.  
25 32 Nicholas SW, Jean-Louis B, Ortiz B, *et al.* Addressing the childhood asthma crisis in Harlem:  
26 the Harlem Children's Zone Asthma Initiative. *Amer J Public Health* 2005;95:245-9.  
27  
28  
29  
30  
31  
32  
33  
34  
35  
36  
37  
38  
39  
40  
41  
42  
43  
44  
45  
46  
47  
48  
49  
50  
51  
52  
53  
54  
55  
56  
57  
58  
59  
60

**FIGURES LEGENDS**

**Figure 1.** Distribution of Within-City Differences in (a) Poverty Rate and (b) Low Educational Attainment for Pairwise Comparisons of California Whites, Blacks, Latinos, and Asians, 2006-2010. \*Considering Whites as a socially advantaged reference group, the differences that favor Whites are considered inequities. The legends show the percent of cities in which the  $p_2$  race/ethnicity group has a better outcome and the percent of cities in which the outcome is statistically significant ( $p < 0.1$ ). For instance, "Black-Asian (77%, 31%)" indicates that 77% of the cities in which the comparison is possible have a better outcome for the Asian group and 31% of those cities have a significantly better outcome.

**Figure 2.** Within-City Poverty Rate Differences and Overall City Poverty Rate (a) and Low Educational Attainment and Overall City Low Educational Attainment (b), California Cities, 2006-2010.  $r$  is the Pearson correlation coefficient between within city differences and the overall city value. \*Considering Whites as a socially advantaged reference group, the differences that favor Whites are considered inequities.

**Figure 3.** Distribution of Within-City Differences in the Highest and Lowest Census Tract Rates for Educational Attainment and Poverty, California, 2006-2010.

1  
2  
3  
4  
5  
6  
7  
8  
9  
10  
11  
12  
13  
14  
15  
16  
17  
18  
19  
20  
21  
22  
23  
24  
25  
26  
27  
28  
29  
30  
31  
32  
33  
34  
35  
36  
37  
38  
39  
40  
41  
42  
43  
44  
45  
46  
47  
48  
49  
50  
51  
52  
53  
54  
55  
56  
57  
58  
59  
60



302x170mm (300 x 300 DPI)

review only

1  
2  
3  
4  
5  
6  
7  
8  
9  
10  
11  
12  
13  
14  
15  
16  
17  
18  
19  
20  
21  
22  
23  
24  
25  
26  
27  
28  
29  
30  
31  
32  
33  
34  
35  
36  
37  
38  
39  
40  
41  
42  
43  
44  
45  
46  
47  
48  
49  
50  
51  
52  
53  
54  
55  
56  
57  
58  
59  
60

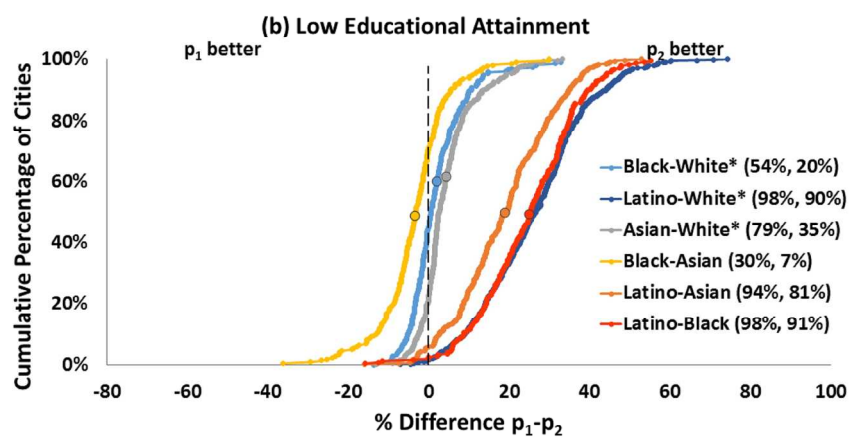

302x170mm (300 x 300 DPI)

review only

1  
2  
3  
4  
5  
6  
7  
8  
9  
10  
11  
12  
13  
14  
15  
16  
17  
18  
19  
20  
21  
22  
23  
24  
25  
26  
27  
28  
29  
30  
31  
32  
33  
34  
35  
36  
37  
38  
39  
40  
41  
42  
43  
44  
45  
46  
47  
48  
49  
50  
51  
52  
53  
54  
55  
56  
57  
58  
59  
60



216x170mm (300 x 300 DPI)

For peer review only

1  
2  
3  
4  
5  
6  
7  
8  
9  
10  
11  
12  
13  
14  
15  
16  
17  
18  
19  
20  
21  
22  
23  
24  
25  
26  
27  
28  
29  
30  
31  
32  
33  
34  
35  
36  
37  
38  
39  
40  
41  
42  
43  
44  
45  
46  
47  
48  
49  
50  
51  
52  
53  
54  
55  
56  
57  
58  
59  
60



216x170mm (300 x 300 DPI)





222x170mm (300 x 300 DPI)

ew only

1  
2  
3  
4  
5  
6  
7  
8  
9  
10  
11  
12  
13  
14  
15  
16  
17  
18  
19  
20  
21  
22  
23  
24  
25  
26  
27  
28  
29  
30  
31  
32  
33  
34  
35  
36  
37  
38  
39  
40  
41  
42  
43  
44  
45  
46  
47  
48  
49  
50  
51  
52  
53  
54  
55  
56  
57  
58  
59  
60

STROBE Statement—Checklist of items that should be included in reports of *cross-sectional studies*

|                              | Item No | Recommendation                                                                                                                                                                                                                                                                                                                                                             |
|------------------------------|---------|----------------------------------------------------------------------------------------------------------------------------------------------------------------------------------------------------------------------------------------------------------------------------------------------------------------------------------------------------------------------------|
| <b>Title and abstract</b>    | 1       | (a) Indicate the study's design with a commonly used term in the title or the abstract<br><a href="#">Page 1</a><br>(b) Provide in the abstract an informative and balanced summary of what was done and what was found<br><a href="#">Pages 2-3</a>                                                                                                                       |
| <b>Introduction</b>          |         |                                                                                                                                                                                                                                                                                                                                                                            |
| Background/rationale         | 2       | Explain the scientific background and rationale for the investigation being reported<br><a href="#">Page 5</a>                                                                                                                                                                                                                                                             |
| Objectives                   | 3       | State specific objectives, including any prespecified hypotheses<br><a href="#">Page 5</a>                                                                                                                                                                                                                                                                                 |
| <b>Methods</b>               |         |                                                                                                                                                                                                                                                                                                                                                                            |
| Study design                 | 4       | Present key elements of study design early in the paper<br><a href="#">Pages 7-8, 9</a>                                                                                                                                                                                                                                                                                    |
| Setting                      | 5       | Describe the setting, locations, and relevant dates, including periods of recruitment, exposure, follow-up, and data collection<br><a href="#">Page 6</a>                                                                                                                                                                                                                  |
| Participants                 | 6       | (a) Give the eligibility criteria, and the sources and methods of selection of participants<br><a href="#">Page 6 (cities in California)</a>                                                                                                                                                                                                                               |
| Variables                    | 7       | Clearly define all outcomes, exposures, predictors, potential confounders, and effect modifiers. Give diagnostic criteria, if applicable<br><a href="#">Pages 7-8, 9</a>                                                                                                                                                                                                   |
| Data sources/<br>measurement | 8*      | For each variable of interest, give sources of data and details of methods of assessment (measurement). Describe comparability of assessment methods if there is more than one group<br><a href="#">Sources of data, page 6</a>                                                                                                                                            |
| Bias                         | 9       | Describe any efforts to address potential sources of bias<br><a href="#">Page 9</a>                                                                                                                                                                                                                                                                                        |
| Study size                   | 10      | Explain how the study size was arrived at<br><a href="#">Page 6 (data available from U.S. Census)</a>                                                                                                                                                                                                                                                                      |
| Quantitative variables       | 11      | Explain how quantitative variables were handled in the analyses. If applicable, describe which groupings were chosen and why<br><a href="#">Pages 7-8, 9</a>                                                                                                                                                                                                               |
| Statistical methods          | 12      | (a) Describe all statistical methods, including those used to control for confounding<br>(b) Describe any methods used to examine subgroups and interactions<br>(c) Explain how missing data were addressed<br>(d) If applicable, describe analytical methods taking account of sampling strategy<br>(e) Describe any sensitivity analyses<br><a href="#">Pages 7-8, 9</a> |
| <b>Results</b>               |         |                                                                                                                                                                                                                                                                                                                                                                            |
| Participants                 | 13*     | (a) Report numbers of individuals at each stage of study—eg numbers potentially eligible, examined for eligibility, confirmed eligible, included in the study, completing follow-up, and analysed<br>(b) Give reasons for non-participation at each stage                                                                                                                  |

|                          |     |                                                                                                                                                                                                                                                                                                                                                                                                                                                           |
|--------------------------|-----|-----------------------------------------------------------------------------------------------------------------------------------------------------------------------------------------------------------------------------------------------------------------------------------------------------------------------------------------------------------------------------------------------------------------------------------------------------------|
|                          |     | (c) Consider use of a flow diagram<br><a href="#">Page 9</a>                                                                                                                                                                                                                                                                                                                                                                                              |
| Descriptive data         | 14* | (a) Give characteristics of study participants (eg demographic, clinical, social) and information on exposures and potential confounders<br>(b) Indicate number of participants with missing data for each variable of interest                                                                                                                                                                                                                           |
| Outcome data             | 15* | Report numbers of outcome events or summary measures<br><a href="#">Pages 10-12, Figures 1-3</a>                                                                                                                                                                                                                                                                                                                                                          |
| Main results             | 16  | (a) Give unadjusted estimates and, if applicable, confounder-adjusted estimates and their precision (eg, 95% confidence interval). Make clear which confounders were adjusted for and why they were included<br>(b) Report category boundaries when continuous variables were categorized<br>(c) If relevant, consider translating estimates of relative risk into absolute risk for a meaningful time period<br><a href="#">Pages 10-12, Figures 1-3</a> |
| Other analyses           | 17  | Report other analyses done—eg analyses of subgroups and interactions, and sensitivity analyses<br><a href="#">Pages 10-12, Figures 1-3</a>                                                                                                                                                                                                                                                                                                                |
| <b>Discussion</b>        |     |                                                                                                                                                                                                                                                                                                                                                                                                                                                           |
| Key results              | 18  | Summarise key results with reference to study objectives<br><a href="#">Page 13</a>                                                                                                                                                                                                                                                                                                                                                                       |
| Limitations              | 19  | Discuss limitations of the study, taking into account sources of potential bias or imprecision. Discuss both direction and magnitude of any potential bias<br><a href="#">Pages 13-14</a>                                                                                                                                                                                                                                                                 |
| Interpretation           | 20  | Give a cautious overall interpretation of results considering objectives, limitations, multiplicity of analyses, results from similar studies, and other relevant evidence<br><a href="#">Page 13</a>                                                                                                                                                                                                                                                     |
| Generalisability         | 21  | Discuss the generalisability (external validity) of the study results<br><a href="#">Not relevant</a>                                                                                                                                                                                                                                                                                                                                                     |
| <b>Other information</b> |     |                                                                                                                                                                                                                                                                                                                                                                                                                                                           |
| Funding                  | 22  | Give the source of funding and the role of the funders for the present study and, if applicable, for the original study on which the present article is based<br><a href="#">Page 18</a>                                                                                                                                                                                                                                                                  |

\*Give information separately for exposed and unexposed groups.

**Note:** An Explanation and Elaboration article discusses each checklist item and gives methodological background and published examples of transparent reporting. The STROBE checklist is best used in conjunction with this article (freely available on the Web sites of PLoS Medicine at <http://www.plosmedicine.org/>, Annals of Internal Medicine at <http://www.annals.org/>, and Epidemiology at <http://www.epidem.com/>). Information on the STROBE Initiative is available at [www.strobe-statement.org](http://www.strobe-statement.org).

# BMJ Open

## Cross Sectional Analysis of Two Social Determinants of Health in California Cities: Racial, Ethnic, and Geographic Disparities

|                                 |                                                                                          |
|---------------------------------|------------------------------------------------------------------------------------------|
| Journal:                        | <i>BMJ Open</i>                                                                          |
| Manuscript ID                   | bmjopen-2016-013975.R3                                                                   |
| Article Type:                   | Research                                                                                 |
| Date Submitted by the Author:   | 24-Feb-2017                                                                              |
| Complete List of Authors:       | Bustamante, Dulce<br>Maizlish, Neil                                                      |
| <b>Primary Subject Heading</b>: | Public health                                                                            |
| Secondary Subject Heading:      | Epidemiology, Health policy, Public health                                               |
| Keywords:                       | EPIDEMIOLOGY, PUBLIC HEALTH, Health policy < HEALTH SERVICES ADMINISTRATION & MANAGEMENT |
|                                 |                                                                                          |

SCHOLARONE™  
Manuscripts

1  
2  
3  
4  
5  
6  
7  
8  
9 Title: **Cross Sectional Analysis of two Social Determinants of Health**  
10 **in California Cities: Racial, Ethnic, and Geographic Disparities**  
11  
12

13  
14  
15  
16 Authors: Dulce Bustamante-Zamora, PhD  
17 1126 Cherry Ave #56, San Bruno, California, 94066,USA  
18 [dulce\\_mariab@hotmail.com](mailto:dulce_mariab@hotmail.com)  
19 Tel. (650) 730-0329  
20

21 Corresponding Author: Neil Maizlish, PhD, MPH  
22 1226 Carlotta Ave, Berkeley, California, 94707, USA  
23 [neil3971@comcast.net](mailto:neil3971@comcast.net)  
24 Tel. (510) 525-4939  
25  
26  
27  
28

29 Key Words: health inequity, health disparity, poverty, educational attainment, race/ethnicity,  
30 neighbourhood  
31

32  
33 Word Count: 3,447  
34  
35  
36  
37  
38  
39  
40  
41  
42  
43  
44  
45  
46  
47  
48  
49  
50  
51  
52  
53  
54  
55  
56  
57  
58  
59  
60

## ABSTRACT

### Objective

To study the magnitude and direction of city level racial and ethnic differences in poverty and education to characterize health equity and social determinants of health in California cities.

### Design

We used data from the American Community Survey, United States Census Bureau, 2006-2010, and calculated differences in the prevalence of poverty and low educational attainment in adults by race/ethnicity and by census tracts within California cities. For race/ethnicity comparisons, when the referent group ( $p_2$ ) to calculate the difference ( $p_1 - p_2$ ) was the non-Hispanic White population (considered a historically advantaged group), a positive difference was considered a health inequity. Differences with a non-White reference group were considered health disparities.

### Setting

Cities of the State of California, United States.

### Results

Within-city differences in the prevalence of poverty and low educational attainment disfavored Black and Latinos compared to Whites in over 78% of cities. Compared to Whites, the median within-city poverty difference was 7.0% for Latinos and 6.2% for Blacks. For education, median within-city difference was 26.6% for Latinos compared to Whites. In a small, but not negligible proportion of cities, historically disadvantaged race/ethnicity groups had better social determinants of health outcomes than Whites. The median difference between the highest and lowest census tracts within cities was 14.3% for poverty and 15.7% for low educational attainment. Overall city poverty rate was weakly, but positively correlated with within-city racial/ethnic differences.

### Conclusions

1  
2  
3 Disparities and inequities are widespread in California. Local health departments can  
4 use these findings to partner with cities in their jurisdiction and design strategies to  
5 reduce racial, ethnic and geographic differences in economic and educational  
6 outcomes. These analytic methods could be used in an ongoing surveillance system to  
7 monitor these determinants of health.  
8  
9  
10  
11  
12  
13  
14  
15  
16  
17  
18  
19  
20  
21  
22  
23  
24  
25  
26  
27  
28  
29  
30  
31  
32  
33  
34  
35  
36  
37  
38  
39  
40  
41  
42  
43  
44  
45  
46  
47  
48  
49  
50  
51  
52  
53  
54  
55  
56  
57  
58  
59  
60

## ARTICLE SUMMARY

### STRENGTHS AND LIMITATIONS OF THIS STUDY

- To our knowledge, this is the first comprehensive tabulation of pairwise within-city SDOH differences between major race/ethnic groups and neighbourhoods across California's cities.
- Most multi-level, place-based research, examines individual and neighborhood impacts, but often bypasses city as a "place": racial and ethnic differences in health outcomes and their social determinants are widely reported in the United States at the national, state, and county scale, with non-Hispanic White populations usually experiencing the best outcomes.
- This article contributes to fill a geographic gap in current public health surveillance methods by documenting the glaring disparities in poverty and low educational attainment by race/ethnicity and neighborhood that exist within nearly every California city.
- This analysis provides both between and within city-level estimates that can be more effective for targeting interventions to where they are most needed.
- As a univariate analysis, our findings have several limitations including lack of examination of other social determinants that could mediate the outcomes, time period of the study that coincides with high levels of economic instability during the Great Recession, 2007-2009, and use of aggregated data that masks the heterogeneity of sub-populations within the racial and ethnic groups studied.



## INTRODUCTION

Differences in health outcomes or their determinants are widely reported between racial and ethnic groups in the United States at the national, state, and county scale.<sup>1-3</sup>

Differences that are avoidable, unfair and rooted in historical social disadvantage are defined as health inequities. Differences with biological or other underlying causes are health disparities.<sup>4</sup> County and city local health departments (LHDs) increasingly recognise their role in addressing the social determinants of health (SDOH) that underlie health inequities. LHDs are also reaching out to non-health sectors in their communities to impact the root causes of health inequities through "Health in All Policies".<sup>5</sup>

Geographic analysis of SDOH is used to reveal health inequities, and prioritise public health interventions and target community engagement. While an increasing number of LHDs examine health inequities at small geographies, most rely on county level data that masks important differences within counties. The surveillance of SDOH at small geographies poses methodological challenges and opportunities for taking data to action. In assessing racial and ethnic inequities, non-Hispanic Whites are often considered the socially advantaged referent group. It has been posited that it is relatively rare for the most privileged group not to have the best outcome.<sup>4, p187</sup>

We explore racial, ethnic, and geographic differences in poverty and low educational attainment. Poverty reduction, increasing educational attainment, and the elimination of health disparities are national health goals of the United States<sup>6</sup>; these two SDOH may account for 18% of the national burden of mortality.<sup>7</sup>

We examined 1) the magnitude and direction of racial, ethnic and geographical differences in these SDOH within and between California cities, 2) the relationship between overall city disadvantage and SDOH disparities and inequities, and 3) possible actions that LHDs may consider based on surveillance findings produced with the research methods suggested in this study.

## METHODS

### Data Source

We used data from the American Community Survey (ACS),<sup>8,9</sup> a continuous prevalence survey based on a probability sample of households throughout the United States. ACS publishes data in 5-year tabulations for cities and census tracts. We used ACS Selected Population Tables (2006-2010), which stratify the tabulations by mutually exclusive race and ethnicity categories: Hispanic or Latino, and non-Hispanic persons of the following races: White, Black, Asian, Native Hawaiian and Other Pacific Islander, Other, Multiple, and American Indian/Alaskan Native. For California, the ACS reported on 8,057 census tracts, 480 incorporated cities and towns, and 1,043 non-incorporated places (from here on towns and non-incorporated places will be referred on as cities). The prevalence of poverty and its standard error were obtained from ACS Table DP03, and educational attainment in adults and its standard error were obtained from Table DP02. The California Department of Public Health compiled these data ([www.cdph.ca.gov/programs/pages/healthycommunityindicators.aspx](http://www.cdph.ca.gov/programs/pages/healthycommunityindicators.aspx)).

### ACS Definition of Poverty and Educational Attainment

The prevalence of poverty was defined as the 5-year annual average percentage of all individuals whose household income in the past 12 months was below the federal poverty level. Total household income was calculated from eight questions on the ACS-1 form about wages, self-employment, securities, rental property, retirement and disability payments, and public assistance. Households were classified as poor when total income of the householder's family was below an income threshold, taking into account the size of the family, number of related children, and, for 1- and 2-person families, age of householder.<sup>8</sup> The prevalence of educational attainment less than high school was defined as the 5-year annual average percentage of adults aged 25 years or older whose maximum educational attainment was 0 to 11 years of grade school.

## Between-City, Within-City, and Neighbourhood Level Racial and Ethnic Disparities and Inequities and Statistical Methods

We calculated between-city, within-city, and neighbourhood level differences for combinations of White, Asian, Latino, and Black subgroups.

Differences in the 5-year percentage of poverty or low educational attainment,  $p$ , were calculated between pairs of racial/ethnic groups,  $p_1 - p_2$ . Differences have a positive or negative sign based on the referent group ( $p_2$ ). When the referent group,  $p_2$ , was White, a positive difference represents a health inequity. Differences with a non-White reference group were considered health disparities. For cities with two or more census tracts, neighbourhood disparities were defined as the absolute difference of census tracts with the highest and lowest 5-year percentage.

Mean and medians of between- and within-city differences and their standard deviation were calculated. The between-city mean difference was defined as the difference of the mean prevalence of two specified race/ethnicity groups across all cities:

$$\text{Between - city mean difference} = \frac{\sum_{i,j} p_{i,j}}{N_{\text{Total}(j)}} - \frac{\sum_{i,k} p_{i+1,k}}{N_{\text{Total}(k)}}$$

where  $i$  is the  $i^{\text{th}}$  race/ethnicity group and  $j$  is the  $j^{\text{th}}$  of  $N$  total cities of group  $i$ , and  $k$  is the  $k^{\text{th}}$  of  $N$  total cities of group  $i+1$ .

The within-city mean difference was defined as:

$$\text{Within - city mean difference} = \frac{\sum_{i,j} (p_{i,j} - p_{i+1,j})}{N_{\text{Total}(j)}}$$

where  $i$  is the  $i^{\text{th}}$  race/ethnicity group and  $j$  is the  $j^{\text{th}}$  of city of  $N_{\text{Total}}$  cities where data on both of the race/ethnicity pairs are available.

1  
2  
3  
4  
5  
6  
7  
8  
9  
10  
11  
12  
13  
14  
15  
16  
17  
18  
19  
20  
21  
22  
23  
24  
25  
26  
27  
28  
29  
30  
31  
32  
33  
34  
35  
36  
37  
38  
39  
40  
41  
42  
43  
44  
45  
46  
47  
48  
49  
50  
51  
52  
53  
54  
55  
56  
57  
58  
59  
60

Within-city differences were plotted as cumulative frequency distributions of cities for each pairwise race/ethnicity comparison in order to assess the magnitude and direction of racial and ethnic inequities or disparities in cities across the state. For each city, Z-tests were carried out to determine whether the within-city difference was statistically significant. We followed U.S. Census Bureau guidelines for pooling standard errors of percents, which is the square root of the sum of the squares of the two individual standard errors ( $se = \sqrt{se_1^2 + se_2^2}$ ). A p value of 0.10 was considered statistically significant. R software was used for the calculations.<sup>10</sup>

SDOH differences are often interpreted in the context of the range of their absolute values. For example, in some very poor cities there may be no demonstrable differences between groups and "everyone is poor together". In other cities, there is a small, but statistically significantly difference between groups, but each group is relatively well off (e.g., has a SDOH value far above the mean.) To contextualise a city's disparities or inequities on a backdrop of high or low rate of poverty or educational attainment, we plotted within-city disparities or inequities, as a function of the between-city poverty rate (or educational attainment). Simple linear correlation (Pearson, r) assessed the strength of association.

### Calculation of Neighbourhood Disparities

Census tract and city boundaries are not always congruent; therefore, for neighbourhood analyses, census tracts were associated with the city into which its centroid fell. We used ArcGIS 10.3 (ESRI, Redlands, CA) to calculate and associate centroids with cities. In some cases, portions of census tracts outside of city limits were included in neighbourhood comparisons. This introduces some potential misclassification if the outlying portion of the census tract has different poverty or educational attainment. We also calculated the mean linear distance in miles between the centroids of the census tracts with the highest and lowest poverty and educational outcomes.

## Exclusions

The ACS does not publish data for geographic areas with fewer than 50 respondents. Of 1,523 cities the number available for within-city pairwise comparisons varied by race/ethnicity subgroup: 221 cities had data for Black-Asian comparisons, 280 for Asian-White, 245 for Black-White, 364 for Latino-Asian, 252 for Latino-Black, and 611 for Latino-White. We did not have sufficient data to carry out pairwise comparisons that included American Indian/Native Alaskans, Native Hawaiians and Other Pacific Islanders, Multiple races, and Other. Analyses of poverty at the census tract level excluded economically dependent populations in colleges, correctional facilities, and other group quarters and institutions. Two census tracts with a population less than 500 inhabitants were also excluded.

## Association between Within-City Geographic Disparities in Educational Attainment and Poverty with Within-City Disparities in Life Expectancy at Birth

To illustrate the association between SDOH and health outcomes within California cities we calculated the correlation coefficient between census tract level life expectancy at birth (LEB) and the two social determinants. The LEB data for California census tracts is publically available through the Health Disadvantage Index Project (<http://phasocal.org/ca-hdi/>). The census tracts with the highest and lowest educational attainment and those with the highest and lowest poverty rates were matched with their LEB. Within cities, the differences between minimum and maximum (min-max) SDOH and health outcomes, respectively, was calculated. Census tract differences in educational attainment and poverty were scaled so that positive differences indicated greater disparities. Census tract difference in LEB were scaled so that positive differences indicated increases in life expectancy, and conversely, negative differences indicated a lower life expectancy. The correlation coefficient between the differences (min-max) was calculated in R.

## RESULTS

### Between- and Within-City Racial and Ethnic Disparities and Inequities

The poverty rate of Latinos (18.6%) and Blacks (17.4%) averaged over California cities was nearly twice that of Whites (9.2%) and Asians (9.5%) (Table 1).

**Table 1** Between and Within-City Means and Race-Ethnicity Specific Pairwise Differences in Poverty Rate and Educational Attainment, California, 2006-2010

|                                                        | Percent below the federal poverty level |        |             | Percent of adults aged $\geq 25$ years without a high school education |              |        |             |        |
|--------------------------------------------------------|-----------------------------------------|--------|-------------|------------------------------------------------------------------------|--------------|--------|-------------|--------|
|                                                        | Mean                                    | SD     | Median      | Mean                                                                   | SD           | Median |             |        |
| Between cities                                         |                                         |        |             |                                                                        |              |        |             |        |
| White                                                  | 9.2                                     | 6.9    | 7.5         | 8.7                                                                    | 7.3          | 6.7    |             |        |
| Black                                                  | 17.4                                    | 12.9   | 14.6        | 11.0                                                                   | 8.9          | 8.8    |             |        |
| Asian                                                  | 9.5                                     | 8.7    | 7.1         | 12.4                                                                   | 9.8          | 9.7    |             |        |
| Latino                                                 | 18.6                                    | 11.4   | 16.8        | 39.6                                                                   | 18.4         | 39.9   |             |        |
| Pairwise differences (p <sub>1</sub> -p <sub>2</sub> ) | Between city                            |        | Within city |                                                                        | Between city |        | Within city |        |
|                                                        | Mean                                    | Median | Mean        | Median                                                                 | Mean         | Median | Mean        | Median |
| Black-White                                            | 8.2                                     | 7.1    | 8.5         | 6.2                                                                    | 2.3          | 2.1    | 2.0         | 0.6    |
| Asian-White                                            | 0.3                                     | -0.4   | 1.7         | 0.9                                                                    | 3.7          | 3.0    | 4.4         | 2.7    |
| Latino-White                                           | 9.4                                     | 9.3    | 7.6         | 7.0                                                                    | 30.9         | 33.2   | 26.2        | 26.6   |
| Black-Asian                                            | 7.9                                     | 7.5    | 6.5         | 4.8                                                                    | -1.4         | -0.9   | -3.3        | -3.1   |
| Latino-Asian                                           | 9.1                                     | 9.7    | 5.1         | 4.8                                                                    | 27.2         | 30.2   | 19.0        | 19.2   |
| Latino-Black                                           | 1.2                                     | 2.2    | 0.3         | 0.5                                                                    | 28.6         | 31.1   | 24.9        | 25.4   |

DRAFT

CONFIDENTIAL

11

1  
2  
3 1 The city average percentage of adults with low educational attainment was 3-4 times  
4 higher in Latinos compared to Whites, Asians, or Blacks. The largest mean between-  
5 2  
6 3 city educational inequity (30.9%) was between Latinos and Whites.  
7  
8 4

9  
10 5 The distribution of within-city differences of race/ethnicity pairs is presented for poverty  
11 and low educational attainment (Figure 1). In a large percentage of cities, Asians and  
12 6  
13 7 Whites had better poverty outcomes than Latinos or Blacks. The largest inequities  
14 8  
15 9 occurred between Blacks and Whites (8.5% mean difference) and Latinos and Whites  
16 10  
17 11 (7.6%). In approximately 40% of cities, these differences were statistically significant.  
18 12  
19 13 Latinos had better poverty outcomes than Asians or Whites in 26% and 18% of cities,  
20 14  
21 15 respectively. Likewise, Blacks had better outcomes than Asians or Whites in  
22 16  
23 17 approximately 20% of cities. The average differences in within-city poverty rates  
24 18  
25 19 between Blacks and Latinos were small (0.3%), but there was considerable variation.  
26 20  
27 21

28 15 For low educational attainment (Figure 1 b), the largest mean difference was between  
29 16  
30 17 Latinos and other groups (Latino-Whites, 26.2%; Latino-Blacks, 24.9%; Latino-Asians,  
31 18  
32 19 19.0%). Whites tended to have better outcomes than Asians or Blacks. Blacks tended to  
33 20  
34 21 have better outcomes than Asians. Latinos had poorer outcomes than the other groups  
35 22  
36 23 in almost all cities (94% or higher). An overwhelming majority of within-city differences  
37 24  
38 25 between Latinos and other groups were statistically significant.  
39 26  
40 27

41 22 Supplemental materials include maps of California cities depicting the race/ethnicity with  
42 23  
43 24 the largest disparity for poverty or educational attainment.  
44 25  
45 26

### 46 25 **Between- and Within-City Racial and Ethnicity Correlations**

47 26

48  
49 27 Within-city racial/ethnic differences in poverty and overall city poverty rate (Figure 2 a),  
50 28  
51 29 appear to be correlated for all race/ethnicity combinations with White or Asian referents,  
52 30  
53 29 but exhibit considerable variability (scatter). Black and Latino inequities (White  
54 30  
55 30 referents) tended to be larger at higher levels of overall poverty ( $r = 0.37$ ,  $P < 0.01$ ). A  
56  
57  
58  
59  
60



DRAFT

CONFIDENTIAL

12

1 weaker association ( $r = 0.20$ ,  $P < 0.01$ ) was observed for Black or Latinos with Asian  
2 referents.

3  
4 In a large proportion of California cities, Latinos experience both large educational  
5 disparities and live in cities with low overall educational attainment. Within-city  
6 education differences between Latinos and other groups were strongly associated ( $r$   
7 range: 0.48 to 0.60) with overall city low educational attainment (Figure 2 b).

### 8 9 **Neighbourhood Disparities**

10  
11 The distribution of within-city differences of poverty and educational attainment between  
12 the highest and lowest census tract is presented in Figure 3. The median difference was  
13 14.3% for poverty and 15.7% for educational attainment. Disparities of 25% or greater  
14 were observed in 25% of cities for poverty and 33% of cities for educational attainment.  
15 In approximately 73% of 500 cities with two or more census tracts, the differences were  
16 statistically significant. For the 174 cities with 10 or more census tracts, 99% of  
17 differences were statistically significant. The median straight-line distance between the  
18 highest and lowest census tracts was 2.6 km (SD, 3.2) for poverty and 2.9 km (SD,  
19 3.04) for educational attainment.

### 20 21 **Within-City Associations between Disparities in Life Expectancy at Birth and** 22 **Disparities in the SDOH**

23  
24 Within cities, increasing disparities in educational attainment between census tracts with  
25 the highest and lowest levels were significantly correlated with increasing disparities in  
26 which life expectancy decreased (Pearson  $r = -0.24$ ,  $p < 0.001$ ). A similar significant  
27 correlation was found for poverty disparities and life expectancy (Pearson  $r = -0.28$ ). In  
28 simple linear regression analyses, 0.08 years of life expectancy was lost for each  
29 percent of educational disparity and 0.05 years of life expectancy was lost for each  
30 percent of poverty disparity.



DRAFT

CONFIDENTIAL

13

## DISCUSSION

We found widespread racial, ethnic, and geographic differences in educational attainment and poverty within California cities. Comparisons between Whites and Blacks and Whites and Latinos generally conformed to a health inequities model – that historically, socially disadvantaged groups had poorer outcomes than Whites. This was less frequent in comparisons between Asians and Whites. In a small, but not negligible proportion of cities, historically disadvantaged race/ethnicity groups had better SDOH outcomes than Whites. We found a correlation between a city's underlying level of poverty (or educational attainment) and racial/ethnic disparities. Neighbourhood level differences within cities were also ubiquitous. On average, a mere 2.6 km separates a city's census tracts with the highest and lowest poverty rate or educational attainment. An illustrative analysis showed that increases in within-city disparities in poverty and educational attainment are associated with reductions in life expectancy, providing support for the relevance of the identification, targeted intervention, and monitoring of SDOH.

## Strengths and Limitations

To our knowledge, this is the first comprehensive tabulation of pairwise within-city SDOH differences between major race/ethnic groups and neighbourhoods across California's cities.

As a univariate analysis, our findings have several limitations. Racial/ethnic differences may be related to other SDOHs which mediate the outcome. For example, recency of immigration profoundly influences poverty and educational attainment,<sup>11</sup> and may explain, in part, the educational inequities we observed in Latinos and Whites. Moreover, SDOH are themselves interrelated. Conducting a multivariate analysis to establish the independence of racial/ethnicity disparities,<sup>4</sup> is not feasible using pre-tabulated ACS tables. Other U.S. Census Bureau products (Public Use Microdata

DRAFT

CONFIDENTIAL

14

1  
2  
3 1 Sample) and surveys may serve this purpose, but do not provide reliable estimates at  
4 2 small geographies.  
5  
6  
7 3

8  
9 4 For a small percentage of cities, socially disadvantaged groups had significantly better  
10 5 outcomes than Whites. Further research of these cities may reveal whether this finding  
11 6 is associated with community "resiliency", confounded by other sociodemographic  
12 7 factors, or has another explanation.  
13  
14 8

15  
16  
17 9 We acknowledge that the race categories included in the analysis are composed of  
18 10 subpopulations whose poverty and educational attainment are heterogeneous (for  
19 11 instance, differences between Asian ethnic groups). Valuable information may have  
20 12 been lost by aggregation.  
21  
22 13

23  
24  
25  
26 14 Differences in SDOH between geographic units such as census tracts may be  
27 15 disparities or inequities, depending on the history of social disadvantage. Long-standing  
28 16 patterns of racial discrimination and economic segregation within California cities<sup>12</sup>  
29 17 undoubtedly underlie some of the differences that we labeled disparities.  
30  
31 18

32  
33  
34  
35 19 Data suppression in the ACS impacts numerically small, geographically dispersed  
36 20 racial/ethnic populations, creating information bias towards areas with greater racial  
37 21 concentration or segregation. Small rural cities account for a disproportionate number of  
38 22 exclusions in our analysis. Nonetheless, depending on the race/ethnicity comparison,  
39 23 the cities included in our analysis contain between 68% and 88% of the California  
40 24 population.  
41  
42 25

43  
44  
45  
46 26 Cross-sectional data cannot be used to establish causal relationships or directionality.  
47 27 Our finding that a city's poverty rate and its racial/ethnic disparities are interrelated will  
48 28 require longitudinal, confirmatory studies. Studies in the United States and western  
49 29 countries suggest that income inequality inhibits overall economic development and  
50 30 economic mobility.<sup>13</sup>  
51  
52 31

DRAFT

CONFIDENTIAL

15

1  
2  
3 1 The time period of this study coincided with high levels of economic instability during the  
4 Great Recession, 2007-2009. Cities and regions might have since experienced  
5 2  
6 economic recovery, gentrification, population displacement, and community succession.  
7 3  
8 4  
9 Due to lags in reporting, ACS data may not reflect current conditions.  
10 5

## 6 **What Can Cities Do?**

7

8 While cities alone cannot be expected to solve economic and educational disparities,  
9 they play an important role in shaping the social determinants of health through people-  
10 and place-based strategies.<sup>14</sup> In the United States local government plays an active  
11 role in recruiting and retaining employers, establishing preferences for minority-owned  
12 businesses, adopting local first-hire policies, and legislating minimum wages. School  
13 districts and boards exert local control over school policy and funding, whether the bulk  
14 of funds are from state or local taxes. Through local zoning, urban revitalization, and the  
15 creation of enterprise zones, local government shapes the built environment and the  
16 availability of resources for the basics of living (e.g., food outlets, housing, jobs,  
17 transportation). Local housing authorities implement federal and state policies that  
18 influence the availability and placement of affordable housing. Several health impact  
19 assessments and health studies document the likely and actual health promoting  
20 impacts of minimum wage ordinances<sup>15, 16</sup> and housing vouchers that relocate renters  
21 from neighbourhoods with concentrated poverty to those with low poverty.<sup>17, 18</sup> Many  
22 cities are examining their own internal policies and practices with regard to hiring,  
23 procurement, and building capacity through authentic deep community engagement.  
24

25 Local elected officials often comprise the governing bodies of regional associations of  
26 government, which make decisions on regional transportation, housing, and economic  
27 investments. Economic development strategies forged at a regional level have a wide  
28 ranging impact at the local level.<sup>19</sup> There is evidence that some strategies that promote  
29 overall regional economic development may exacerbate economic disparities.<sup>20</sup>  
30

## 31 **What Can Local Health Departments Do?**

56  
57  
58  
59  
60

DRAFT

CONFIDENTIAL

16

1

2  
3  
4  
5  
6  
7  
8  
9  
10  
11  
12  
13  
14  
15  
16  
17  
18  
19  
20  
21  
22  
23  
24  
25  
26  
27  
28  
29  
30  
31  
32  
33  
34  
35  
36  
37  
38  
39  
40  
41  
42  
43  
44  
45  
46  
47  
48  
49  
50  
51  
52  
53  
54  
55  
56  
57  
58  
59  
60  
1  
2  
3  
4  
5  
6  
7  
8  
9  
10  
11  
12  
13  
14  
15  
16  
17  
18  
19  
20  
21  
22  
23  
24  
25  
26  
27  
28  
29  
30  
31  
Data and Surveillance

In general, SDOH indicators have not been institutionalised in public health surveillance at the state and local level in the same manner as mortality surveillance, communicable disease reporting, and behavioral risk factor surveillance. Monitoring SDOH geographic variation, time trends, and population subgroups help assess the magnitude of the problem, identify high risk groups, monitor progress toward meeting goals, set priorities, and target resources for intervention. Several U.S. states have offices of health equity, which issue periodic reports.<sup>21, 22</sup> Due to requirements of the Affordable Care Act (ACA), LHDs in partnership with nonprofit hospitals and community coalitions are producing community health needs assessments and improvement plans [US IRS Code Title IX, §6033(b)], frequently framing health disparities in terms of SDOH.<sup>23, 24</sup> ACA implementation supports the institutionalization of surveillance of the SDOH at geographically resolved areas throughout the United States.

Health departments can also use the distribution of within-city inequities to identify specific cities that share socioeconomic and demographic similarities, but differ on health inequities. Fostering exchanges like learning collaboratives or intervention trials between peer cities may be but one mechanism to engage cities and identify successful strategies to reduce inequities.

Some LHDs are taking systematic approaches to link SDOH surveillance data to action in the form of how-to guides,<sup>25</sup> internal capacity building, and setting explicit goals and activities to reduce disparities.<sup>26</sup>

#### Internal Capacity Building on Racial and Health Equity

Efforts to examine and counter structural racism in health inequities are being integrated into public health practice by identifying upstream causes,<sup>22 27</sup> and conducting assessments of organizational behavior in health departments. Educational and action-

DRAFT

CONFIDENTIAL

17

1 oriented workshops, training, and toolkits are increasingly part of public health  
2 workforce development, program design, policy development, and evaluation<sup>28, 29</sup> and  
3 should touch areas relevant to public health department accreditation.  
4

#### 5 Health in All Policies

6

7 With the ascendance of Health in All Policies (HiAP),<sup>5</sup> public health departments have  
8 opportunities to play an active and direct role in educating policy makers on the SDOH  
9 and health equity. Because different sectors may frame equity in profoundly different  
10 ways,<sup>30</sup> public health practitioners can convene and constructively engage partners,  
11 including those central to economic development and education. HiAP-related actions  
12 include health impact assessments, advising and participating in cross-sector planning  
13 (e.g., land use, transportation, food systems), and developing tools that non-health  
14 planners can use to quantify the health benefits or harms of various policies or  
15 programs.<sup>28</sup>  
16

#### 17 Service Environment

18

19 Overcoming fragmented social services delivery is highly desirable and underpins  
20 comprehensive models of service delivery that may have collective impact and address  
21 SDOHs.<sup>31,32</sup> Building on city-level data of poverty and educational inequities, health  
22 departments can play a role in monitoring and evaluating the equitable access and  
23 distribution of services provided by the health department and other social service  
24 agencies.  
25

#### 26 Conclusions

27

28 Racial, ethnic, and geographic disparities in poverty and educational attainment in  
29 adults are widespread within and between California cities. Given that public health  
30 practice is increasingly addressing root causes of disease, the identification, targeted  
31 intervention, and surveillance of the social determinants of health may afford

DRAFT

CONFIDENTIAL

18

1 opportunities for engagement with neighbourhoods, cities, and regional government to  
2 be an active partner in strategies that promote health and reduce poverty and low  
3 educational attainment.

#### 4 **ACKNOWLEDGEMENTS**

5 The authors acknowledge valuable review and comments by Dr. Linda Rudolph and  
6 Brad Jacobsen.

#### 7 **CONTRIBUTORS**

8 DB and NM shared responsibilities in the design, analysis, and write up of this research.

#### 9 **FUNDING**

10 This research was self-sponsored by the authors and did not receive funding from a  
11 public, commercial or not-for-profit agency. The California Strategic Growth Council and  
12 The California Department of Public Health funded and created the datasets used in this  
13 analysis. The views expressed by the authors are their own and do not necessarily  
14 reflect those of employers or organizations with whom they have/had affiliations.

#### 15 **COMPETING INTERESTS**

16 None declared.

#### 17 **PROTECTION OF HUMAN SUBJECTS IN RESEARCH**

18 This study used publicly available data and did not involve human subjects in research.

#### 19 **DATA SHARING STATEMENT**

20 This study used publicly available data. Data sets used in this analysis can be  
21 downloaded from:

22 <http://www.cdph.ca.gov/programs/Pages/HealthyCommunityIndicators.aspx>.



1  
2  
3  
4  
5  
6  
7  
8  
9  
10  
11  
12  
13  
14  
15  
16  
17  
18  
19  
20  
21  
22  
23  
24  
25  
26  
27  
28  
29  
30  
31  
32  
33  
34  
35  
36  
37  
38  
39  
40  
41  
42  
43  
44  
45  
46  
47  
48  
49  
50  
51  
52  
53  
54  
55  
56  
57  
58  
59  
60

1 **REFERENCES**

- 2 1 Agency for Healthcare Research and Quality. 2014 National Healthcare Quality and  
3 Disparities Report. AHRQ Publication No. 15-0007. Rockville, MD: Agency for Healthcare  
4 Research and Quality 2015.
- 5 2 Centers for Disease Control and Prevention. CDC Health Disparities and Inequalities Report  
6 — United States, 2013. *MMWR* 2013;62:Suppl 3.
- 7 3 National Center for Health Statistics. Health, United States, 2014: With Special Feature on  
8 Adults Aged 55–64. Hyattsville, MD: U.S. Department of Health and Human Services 2015.
- 9 4 Braveman P. What are health disparities and health equity? We need to be clear. *Public  
10 Health Rep* 2014;129:(Suppl 2):5-8.
- 11 5 Rudolph L, Caplan J, Mitchell C, *et al*. Health in All Policies: Improving Health Through  
12 Intersectoral Collaboration. Washington, DC: Institute of Medicine 2013.
- 13 6 U.S. Department of Health and Human Services. Healthy People 2020. Topics & Objectives:  
14 Social Determinants of Health. Washington, DC: U.S. Department of Health and Human  
15 Services 2015.
- 16 7 Galea S, Tracy M, Hoggatt K, *et al*. Estimated deaths attributable to social factors in the  
17 United States. *Am J Public Health* 2011;101:1456–65.
- 18 8 U.S. Bureau of Census. American Community Survey: Code Lists, Definitions, and  
19 Accuracy. Washington, DC: U.S. Department of Commerce 2014.
- 20 9 U.S. Bureau of Census. American Community Survey: Design and Methodology. Version  
21 2.0. Washington, DC: U.S. Department of Commerce 2014.
- 22 10 R Core Team. R: A Language and Environment for Statistical Computing. Vienna, Austria: R  
23 Foundation For Statistical Computing 2015.
- 24 11 Sullivan D, Ziegert A. Hispanic Immigrant Poverty: Does Ethnic Origin Matter? *Pop Res  
25 Policy Rev* 2008;27:667-87.
- 26 12 Iceland J, Weinberg DH, Steinmetz E. Racial and Ethnic Residential Segregation in the  
27 United States: 1980-2000. Series CENSR-3. Washington, DC: U.S. Census Bureau 2002.
- 28 13 Cingano F. Trends in Income Inequality and its Impact on Economic Growth. OECD Social,  
29 Employment and Migration Working Papers, No. 163. Paris, France: Organisation for  
30 Economic Co-operation and Development Publishing 2014.
- 31 14 Pastor M, Turner M. Reducing Poverty and Economic Distress after ARRA Potential Roles  
32 for Place-conscious Strategies. Washington, DC: Urban Institute 2010.
- 33 15 Bhatia R, Katz M. Estimation of Health Benefits From a Local Living Wage Ordinance. *Am J  
34 Public Health* 2001;91:1398-402.
- 35 16 Cole BL, Shimkhada R, Morgenstern M, *et al*. Projected health impact of the Los Angeles  
36 City living wage ordinance. *J Epidemiol Community Health* 2005;59:645-50.
- 37 17 Chetty R, Hendren N, Katz L. The Effects of Exposure to Better Neighborhoods on Children:  
38 New Evidence from the Moving to Opportunity Experiment. Cambridge, MA: Harvard  
39 University and NBER 2015.
- 40 18 Ludwig J, Sanbonmatsu L, Gennetian L, *et al*. Neighborhoods, obesity, and diabetes — A  
41 randomized social experiment. *N Engl J Med* 2011;365:1509-19.
- 42 19 Porter M. The economic performance of regions. *Regional Studies* 2003;37:549-78.
- 43 20 Morrill R. Inequality of the largest U.S. metropolitan areas. *New Geography* 9/11/2013.
- 44 21 Office of Health Equity. Portrait of Promise: The California Statewide Plan to Promote Health  
45 and Mental Health Equity. A Report to the Legislature and the People of California by the  
46 Office of Health Equity. Sacramento, CA: California Department of Public Health, Office of  
47 Health Equity 2015.
- 48 22 Minnesota Department of Public Health. Advancing Health Equity in Minnesota: Report to  
49 the Legislature. St. Paul, MN: Minnesota Department of Public Health 2014.

DRAFT

CONFIDENTIAL

20

- 1  
2  
3 1 23 Tulsa Health Department. Community Health Improvement Plan: Pathways to Health. Tulsa,  
4 2 OK: Pathways to Health.org 2014.  
5 3 24 BeHealthyDenver.org. Health of Denver Report: Community Health Assessment. Denver,  
6 4 CO: BeHealthyDenver.org 2014.  
7 5 25 Bay Area Regional Health Inequities Initiative Data Committee. Applying Social  
8 6 Determinants of Health Indicators to Advance Health Equity: A Guide for Local Health  
9 7 Department Epidemiologists and Public Health Professionals. Oakland, CA: Bay Area  
10 8 Regional Health Inequities Initiative 2015.  
11 9 26 Multnomah County Health Department. Health Equity Initiative. A Five Year Reflection:  
12 10 Policy Crosswalk, 2008-2013. Portland, OR: Multnomah County Health Department 2013.  
13 11 27 Gee G, Ford C. Structural racism and health inequities: old issues, new directions. *Du Bois*  
14 12 *Rev* 2011;8:115-32.  
15 13 28 Nelson J. Racial Equity Toolkit: An Opportunity to Operationalize Equity. Berkeley, CA:  
16 14 Government Alliance on Race and Equity, Haas Institute for a Fair & Inclusive Society,  
17 15 University of California, Berkeley 2015.  
18 16 29 Internal Capacity Committee of BARHII. Local Health Department Organizational Self-  
19 17 Assessment for Addressing Health Inequities: Toolkit and Guide to Implementation.  
20 18 Oakland, CA: Bay Area Regional Health Inequities Initiative 2010.  
21 19 30 Committee on Equity Implications of Evolving Transportation Finance Mechanisms. Equity of  
22 20 Evolving Transportation Finance Mechanisms. Special Report 303. Washington, D.C.:  
23 21 Transportation Research Board 2011.  
24 22 31 Kania J, Kramer M. Collective Impact. *Stanford Social Innovation Review* 2011;Winter.  
25 23 32 Nicholas SW, Jean-Louis B, Ortiz B, *et al.* Addressing the childhood asthma crisis in Harlem:  
26 24 the Harlem Children's Zone Asthma Initiative. *Amer J Public Health* 2005;95:245-9.  
27  
28  
29  
30  
31  
32  
33  
34  
35  
36  
37  
38  
39  
40  
41  
42  
43  
44  
45  
46  
47  
48  
49  
50  
51  
52  
53  
54  
55  
56  
57  
58  
59  
60



DRAFT

CONFIDENTIAL

21

**FIGURES LEGENDS**

**Figure 1.** Distribution of Within-City Differences in (a) Poverty Rate and (b) Low Educational Attainment for Pairwise Comparisons of California Whites, Blacks, Latinos, and Asians, 2006-2010. \*Considering Whites as a socially advantaged reference group, the differences that favor Whites are considered inequities. The legends show the percent of cities in which the p<sub>2</sub> race/ethnicity group has a better outcome and the percent of cities in which the outcome is statistically significant ( $p < 0.1$ ). For instance, “Black-Asian (77%, 31%)” indicates that 77% of the cities in which the comparison is possible have a better outcome for the Asian group and 31% of those cities have a significantly better outcome.

**Figure 2.** Within-City Poverty Rate Differences and Overall City Poverty Rate (a) and Low Educational Attainment and Overall City Low Educational Attainment (b), California Cities, 2006-2010.  $r$  is the Pearson correlation coefficient between within city differences and the overall city value. \*Considering Whites as a socially advantaged reference group, the differences that favor Whites are considered inequities.

**Figure 3.** Distribution of Within-City Differences in the Highest and Lowest Census Tract Rates for Educational Attainment and Poverty, California, 2006-2010.

1  
2  
3  
4  
5  
6  
7  
8  
9  
10  
11  
12  
13  
14  
15  
16  
17  
18  
19  
20  
21  
22  
23  
24  
25  
26  
27  
28  
29  
30  
31  
32  
33  
34  
35  
36  
37  
38  
39  
40  
41  
42  
43  
44  
45  
46  
47  
48  
49  
50  
51  
52  
53  
54  
55  
56  
57  
58  
59  
60



302x170mm (300 x 300 DPI)

review only

1  
2  
3  
4  
5  
6  
7  
8  
9  
10  
11  
12  
13  
14  
15  
16  
17  
18  
19  
20  
21  
22  
23  
24  
25  
26  
27  
28  
29  
30  
31  
32  
33  
34  
35  
36  
37  
38  
39  
40  
41  
42  
43  
44  
45  
46  
47  
48  
49  
50  
51  
52  
53  
54  
55  
56  
57  
58  
59  
60



302x170mm (300 x 300 DPI)

review only

1  
2  
3  
4  
5  
6  
7  
8  
9  
10  
11  
12  
13  
14  
15  
16  
17  
18  
19  
20  
21  
22  
23  
24  
25  
26  
27  
28  
29  
30  
31  
32  
33  
34  
35  
36  
37  
38  
39  
40  
41  
42  
43  
44  
45  
46  
47  
48  
49  
50  
51  
52  
53  
54  
55  
56  
57  
58  
59  
60



216x170mm (300 x 300 DPI)

ew only

1  
2  
3  
4  
5  
6  
7  
8  
9  
10  
11  
12  
13  
14  
15  
16  
17  
18  
19  
20  
21  
22  
23  
24  
25  
26  
27  
28  
29  
30  
31  
32  
33  
34  
35  
36  
37  
38  
39  
40  
41  
42  
43  
44  
45  
46  
47  
48  
49  
50  
51  
52  
53  
54  
55  
56  
57  
58  
59  
60



216x170mm (300 x 300 DPI)

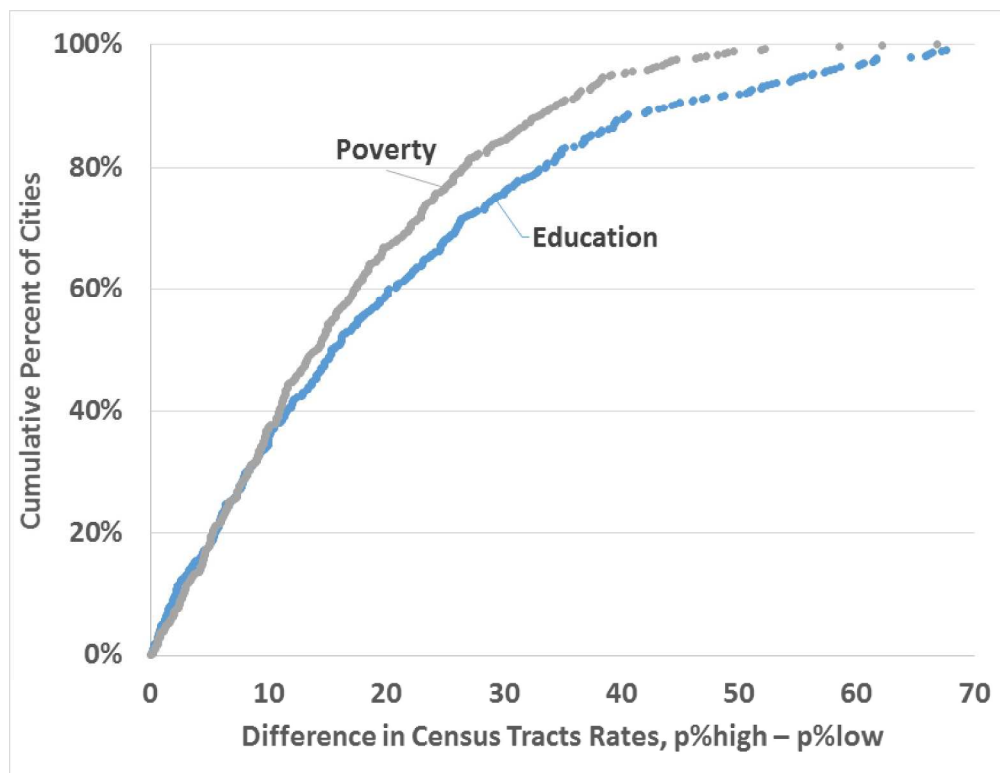

222x170mm (300 x 300 DPI)

ew only

1  
2  
3  
4  
5  
6  
7  
8  
9  
10  
11  
12  
13  
14  
15  
16  
17  
18  
19  
20  
21  
22  
23  
24  
25  
26  
27  
28  
29  
30  
31  
32  
33  
34  
35  
36  
37  
38  
39  
40  
41  
42  
43  
44  
45  
46  
47  
48  
49  
50  
51  
52  
53  
54  
55  
56  
57  
58  
59  
60

STROBE Statement—Checklist of items that should be included in reports of *cross-sectional studies*

|                              | Item No | Recommendation                                                                                                                                                                                                                                                                                                                                                             |
|------------------------------|---------|----------------------------------------------------------------------------------------------------------------------------------------------------------------------------------------------------------------------------------------------------------------------------------------------------------------------------------------------------------------------------|
| <b>Title and abstract</b>    | 1       | (a) Indicate the study's design with a commonly used term in the title or the abstract<br><a href="#">Page 1</a><br>(b) Provide in the abstract an informative and balanced summary of what was done and what was found<br><a href="#">Pages 2-3</a>                                                                                                                       |
| <b>Introduction</b>          |         |                                                                                                                                                                                                                                                                                                                                                                            |
| Background/rationale         | 2       | Explain the scientific background and rationale for the investigation being reported<br><a href="#">Page 5</a>                                                                                                                                                                                                                                                             |
| Objectives                   | 3       | State specific objectives, including any prespecified hypotheses<br><a href="#">Page 5</a>                                                                                                                                                                                                                                                                                 |
| <b>Methods</b>               |         |                                                                                                                                                                                                                                                                                                                                                                            |
| Study design                 | 4       | Present key elements of study design early in the paper<br><a href="#">Pages 7-8, 9</a>                                                                                                                                                                                                                                                                                    |
| Setting                      | 5       | Describe the setting, locations, and relevant dates, including periods of recruitment, exposure, follow-up, and data collection<br><a href="#">Page 6</a>                                                                                                                                                                                                                  |
| Participants                 | 6       | (a) Give the eligibility criteria, and the sources and methods of selection of participants<br><a href="#">Page 6 (cities in California)</a>                                                                                                                                                                                                                               |
| Variables                    | 7       | Clearly define all outcomes, exposures, predictors, potential confounders, and effect modifiers. Give diagnostic criteria, if applicable<br><a href="#">Pages 7-8, 9</a>                                                                                                                                                                                                   |
| Data sources/<br>measurement | 8*      | For each variable of interest, give sources of data and details of methods of assessment (measurement). Describe comparability of assessment methods if there is more than one group<br><a href="#">Sources of data, page 6</a>                                                                                                                                            |
| Bias                         | 9       | Describe any efforts to address potential sources of bias<br><a href="#">Page 9</a>                                                                                                                                                                                                                                                                                        |
| Study size                   | 10      | Explain how the study size was arrived at<br><a href="#">Page 6 (data available from U.S. Census)</a>                                                                                                                                                                                                                                                                      |
| Quantitative variables       | 11      | Explain how quantitative variables were handled in the analyses. If applicable, describe which groupings were chosen and why<br><a href="#">Pages 7-8, 9</a>                                                                                                                                                                                                               |
| Statistical methods          | 12      | (a) Describe all statistical methods, including those used to control for confounding<br>(b) Describe any methods used to examine subgroups and interactions<br>(c) Explain how missing data were addressed<br>(d) If applicable, describe analytical methods taking account of sampling strategy<br>(e) Describe any sensitivity analyses<br><a href="#">Pages 7-8, 9</a> |
| <b>Results</b>               |         |                                                                                                                                                                                                                                                                                                                                                                            |
| Participants                 | 13*     | (a) Report numbers of individuals at each stage of study—eg numbers potentially eligible, examined for eligibility, confirmed eligible, included in the study, completing follow-up, and analysed<br>(b) Give reasons for non-participation at each stage                                                                                                                  |

|                          |     |                                                                                                                                                                                                                                                                                                                                                                                                                                                           |
|--------------------------|-----|-----------------------------------------------------------------------------------------------------------------------------------------------------------------------------------------------------------------------------------------------------------------------------------------------------------------------------------------------------------------------------------------------------------------------------------------------------------|
|                          |     | (c) Consider use of a flow diagram<br><a href="#">Page 9</a>                                                                                                                                                                                                                                                                                                                                                                                              |
| Descriptive data         | 14* | (a) Give characteristics of study participants (eg demographic, clinical, social) and information on exposures and potential confounders<br>(b) Indicate number of participants with missing data for each variable of interest                                                                                                                                                                                                                           |
| Outcome data             | 15* | Report numbers of outcome events or summary measures<br><a href="#">Pages 10-12, Figures 1-3</a>                                                                                                                                                                                                                                                                                                                                                          |
| Main results             | 16  | (a) Give unadjusted estimates and, if applicable, confounder-adjusted estimates and their precision (eg, 95% confidence interval). Make clear which confounders were adjusted for and why they were included<br>(b) Report category boundaries when continuous variables were categorized<br>(c) If relevant, consider translating estimates of relative risk into absolute risk for a meaningful time period<br><a href="#">Pages 10-12, Figures 1-3</a> |
| Other analyses           | 17  | Report other analyses done—eg analyses of subgroups and interactions, and sensitivity analyses<br><a href="#">Pages 10-12, Figures 1-3</a>                                                                                                                                                                                                                                                                                                                |
| <b>Discussion</b>        |     |                                                                                                                                                                                                                                                                                                                                                                                                                                                           |
| Key results              | 18  | Summarise key results with reference to study objectives<br><a href="#">Page 13</a>                                                                                                                                                                                                                                                                                                                                                                       |
| Limitations              | 19  | Discuss limitations of the study, taking into account sources of potential bias or imprecision. Discuss both direction and magnitude of any potential bias<br><a href="#">Pages 13-14</a>                                                                                                                                                                                                                                                                 |
| Interpretation           | 20  | Give a cautious overall interpretation of results considering objectives, limitations, multiplicity of analyses, results from similar studies, and other relevant evidence<br><a href="#">Page 13</a>                                                                                                                                                                                                                                                     |
| Generalisability         | 21  | Discuss the generalisability (external validity) of the study results<br><a href="#">Not relevant</a>                                                                                                                                                                                                                                                                                                                                                     |
| <b>Other information</b> |     |                                                                                                                                                                                                                                                                                                                                                                                                                                                           |
| Funding                  | 22  | Give the source of funding and the role of the funders for the present study and, if applicable, for the original study on which the present article is based<br><a href="#">Page 18</a>                                                                                                                                                                                                                                                                  |

\*Give information separately for exposed and unexposed groups.

**Note:** An Explanation and Elaboration article discusses each checklist item and gives methodological background and published examples of transparent reporting. The STROBE checklist is best used in conjunction with this article (freely available on the Web sites of PLoS Medicine at <http://www.plosmedicine.org/>, Annals of Internal Medicine at <http://www.annals.org/>, and Epidemiology at <http://www.epidem.com/>). Information on the STROBE Initiative is available at [www.strobe-statement.org](http://www.strobe-statement.org).
