# Supplementary material for: Cross-sectional analysis of two social determinants of health in California cities: racial/ethnic and geographic disparities
Source: PubMed Central journal article supplement — BMJ Open. 2017 Jun 6;7(5):e013975. doi: 10.1136/bmjopen-2016-013975 (PMC5730014; doi:10.1136/bmjopen-2016-013975), 2017-06-06
Supplement: bmjopen-2016-013975supp001.pdf [file bmjopen-2016-013975supp001.pdf]

## **SUPPLEMENTAL FIGURES LEGENDS**

Figure 1. Selected Northern California cities with statistically significant poverty disparities by race/ethnicity group with the highest poverty rate, 2006-2010

Figure 2. Selected Southern California cities with statistically significant poverty disparities by race/ethnicity group with the highest poverty rate, 2006-2010.

Figure 3. Selected Northern California cities with statistically significant disparities in educational attainment by race/ethnicity group with the lowest educational attainment, 2006-2010.

Figure 4. Selected Southern California cities with statistically significant poverty disparities by race/ethnicity group with the lowest educational attainment, 2006-2010.

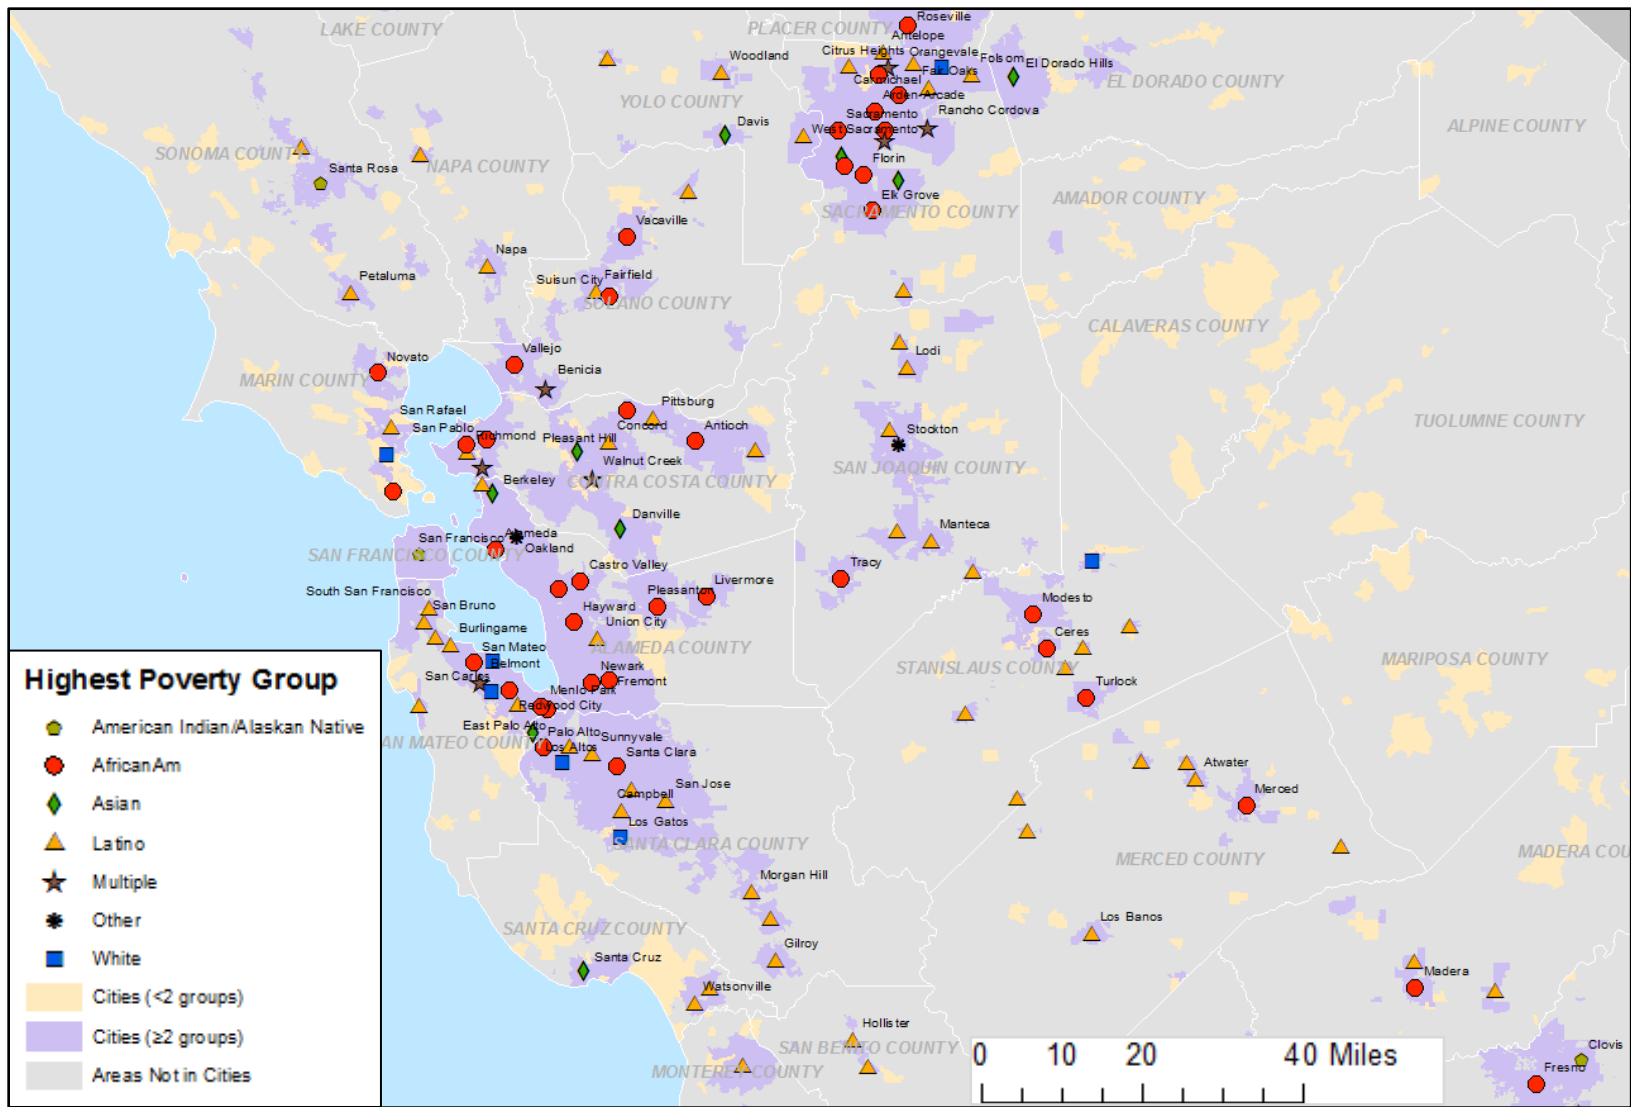

Figure 1.

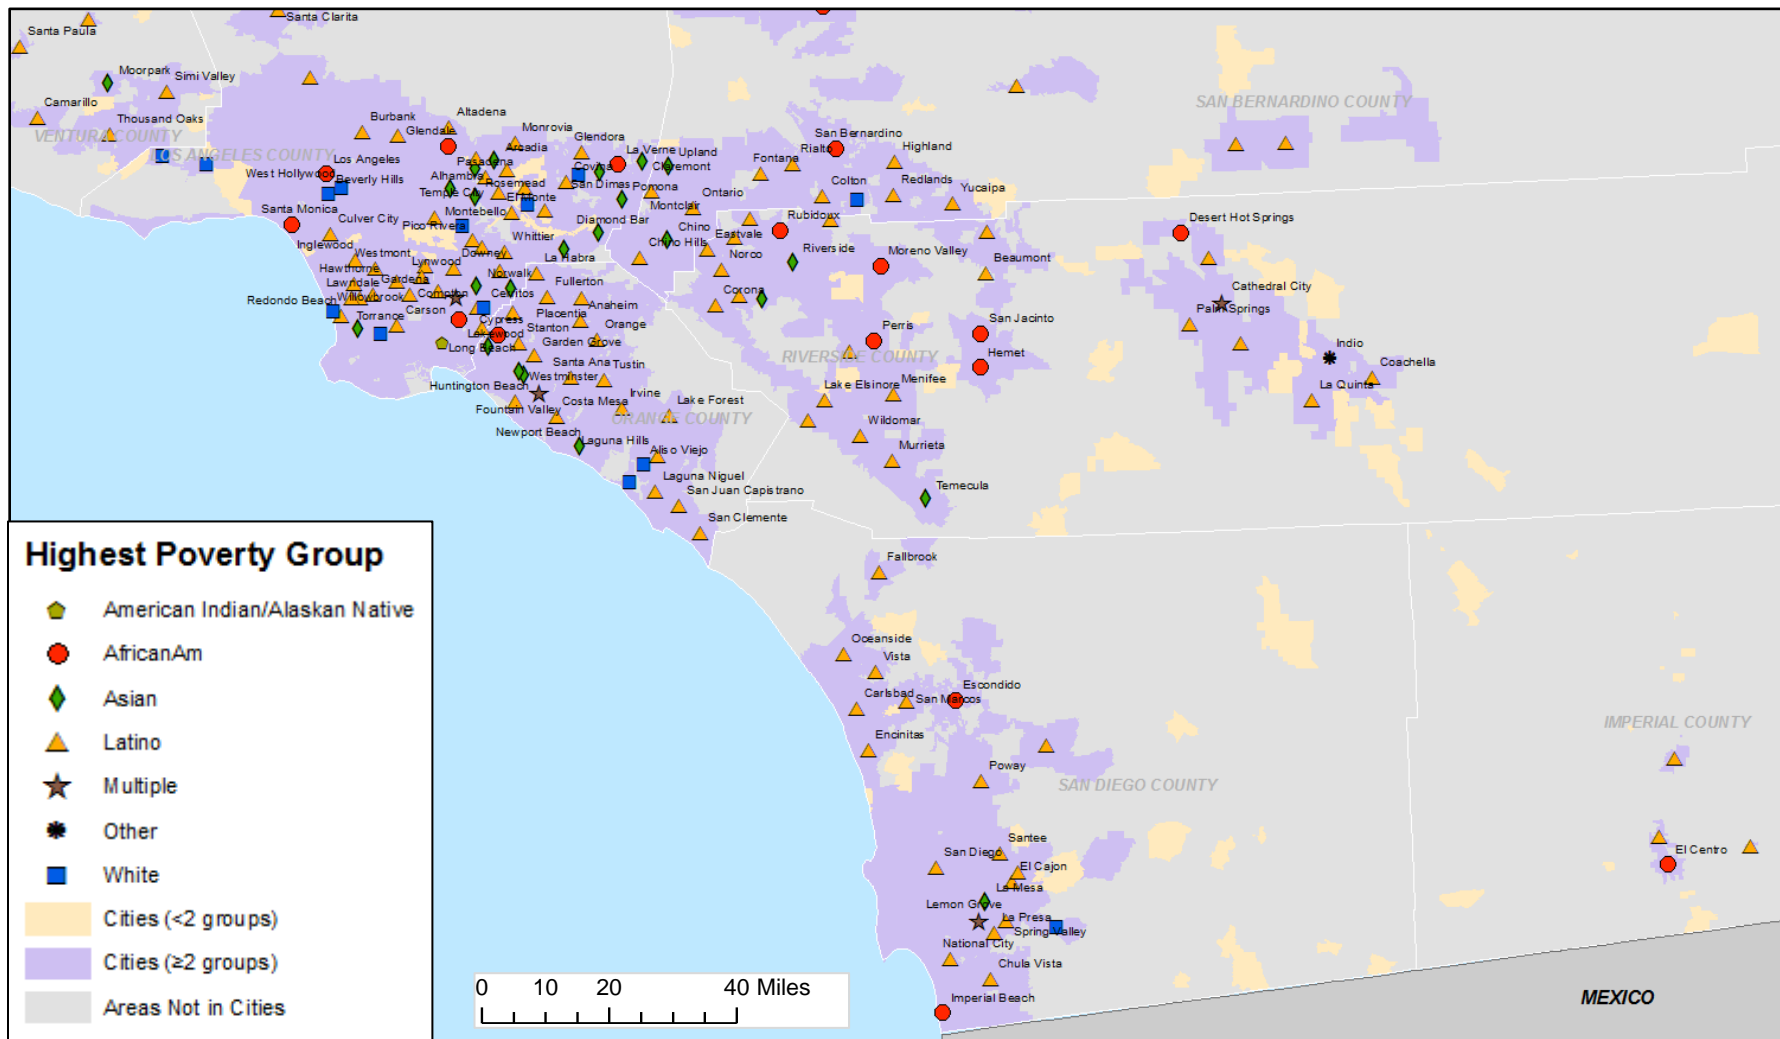

Figure 2.

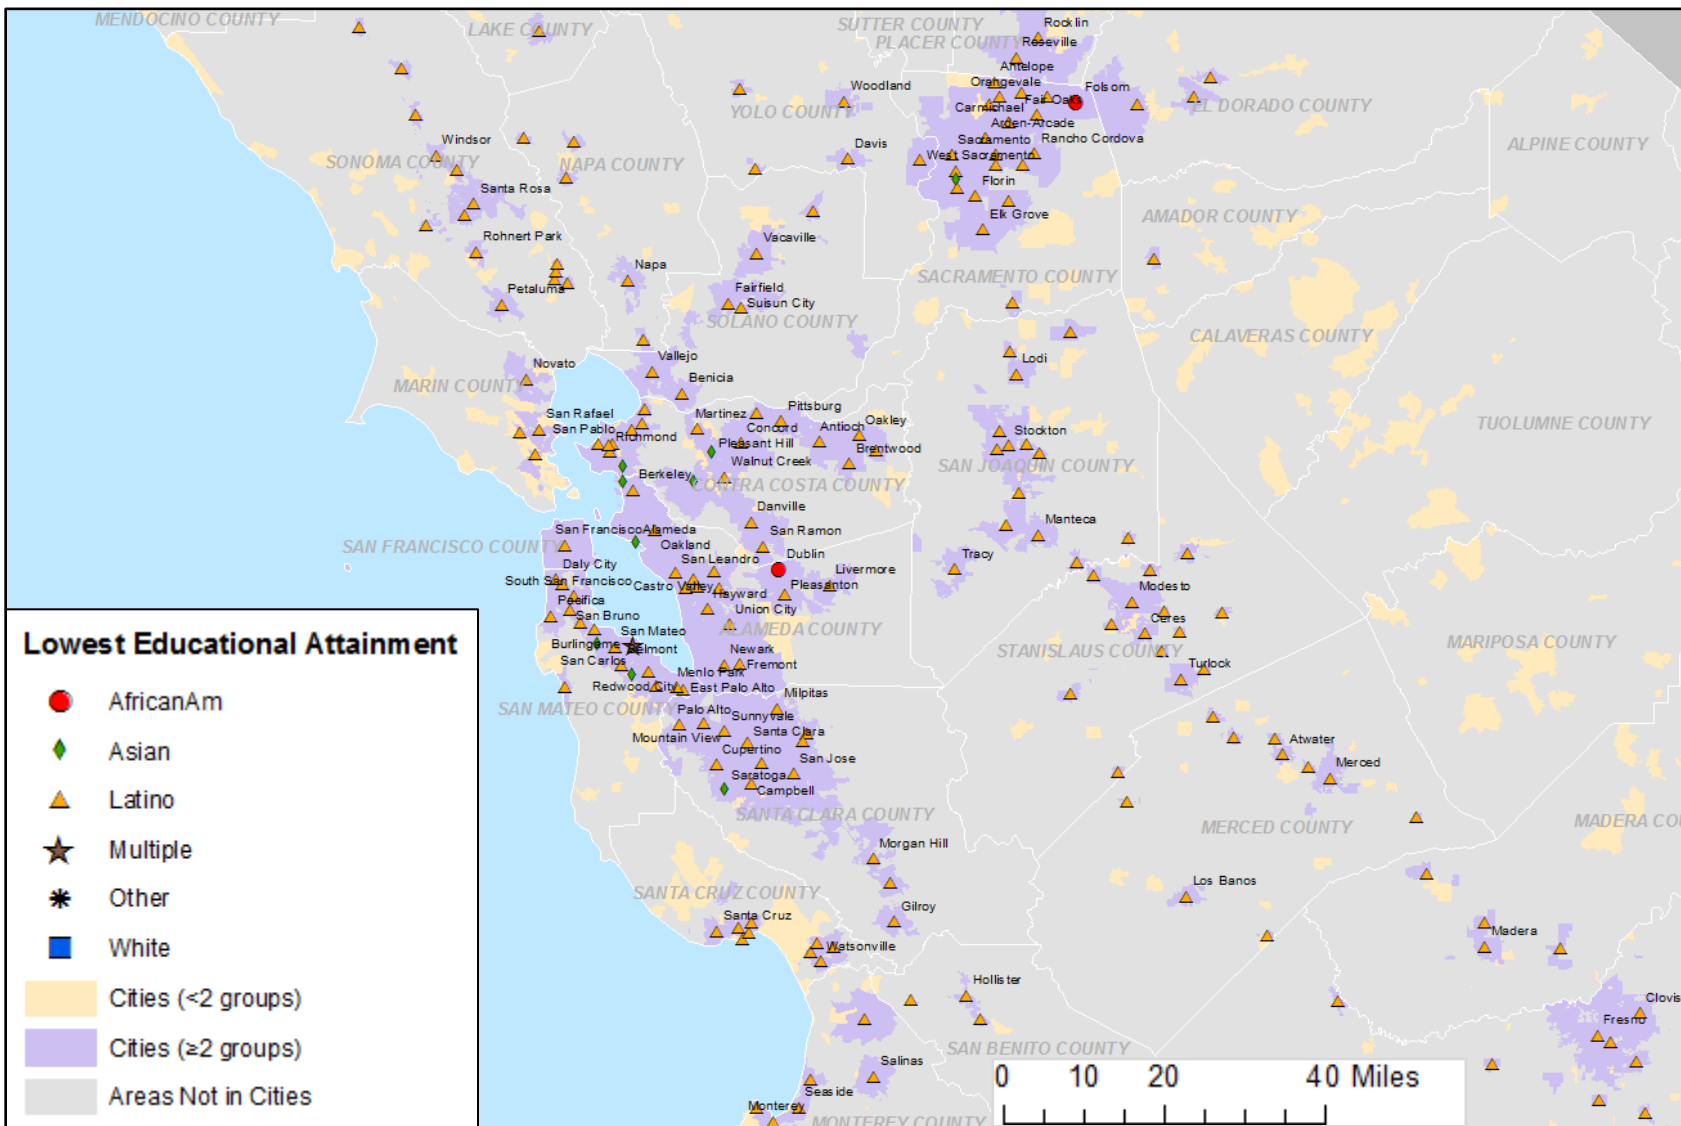

Figure 3.

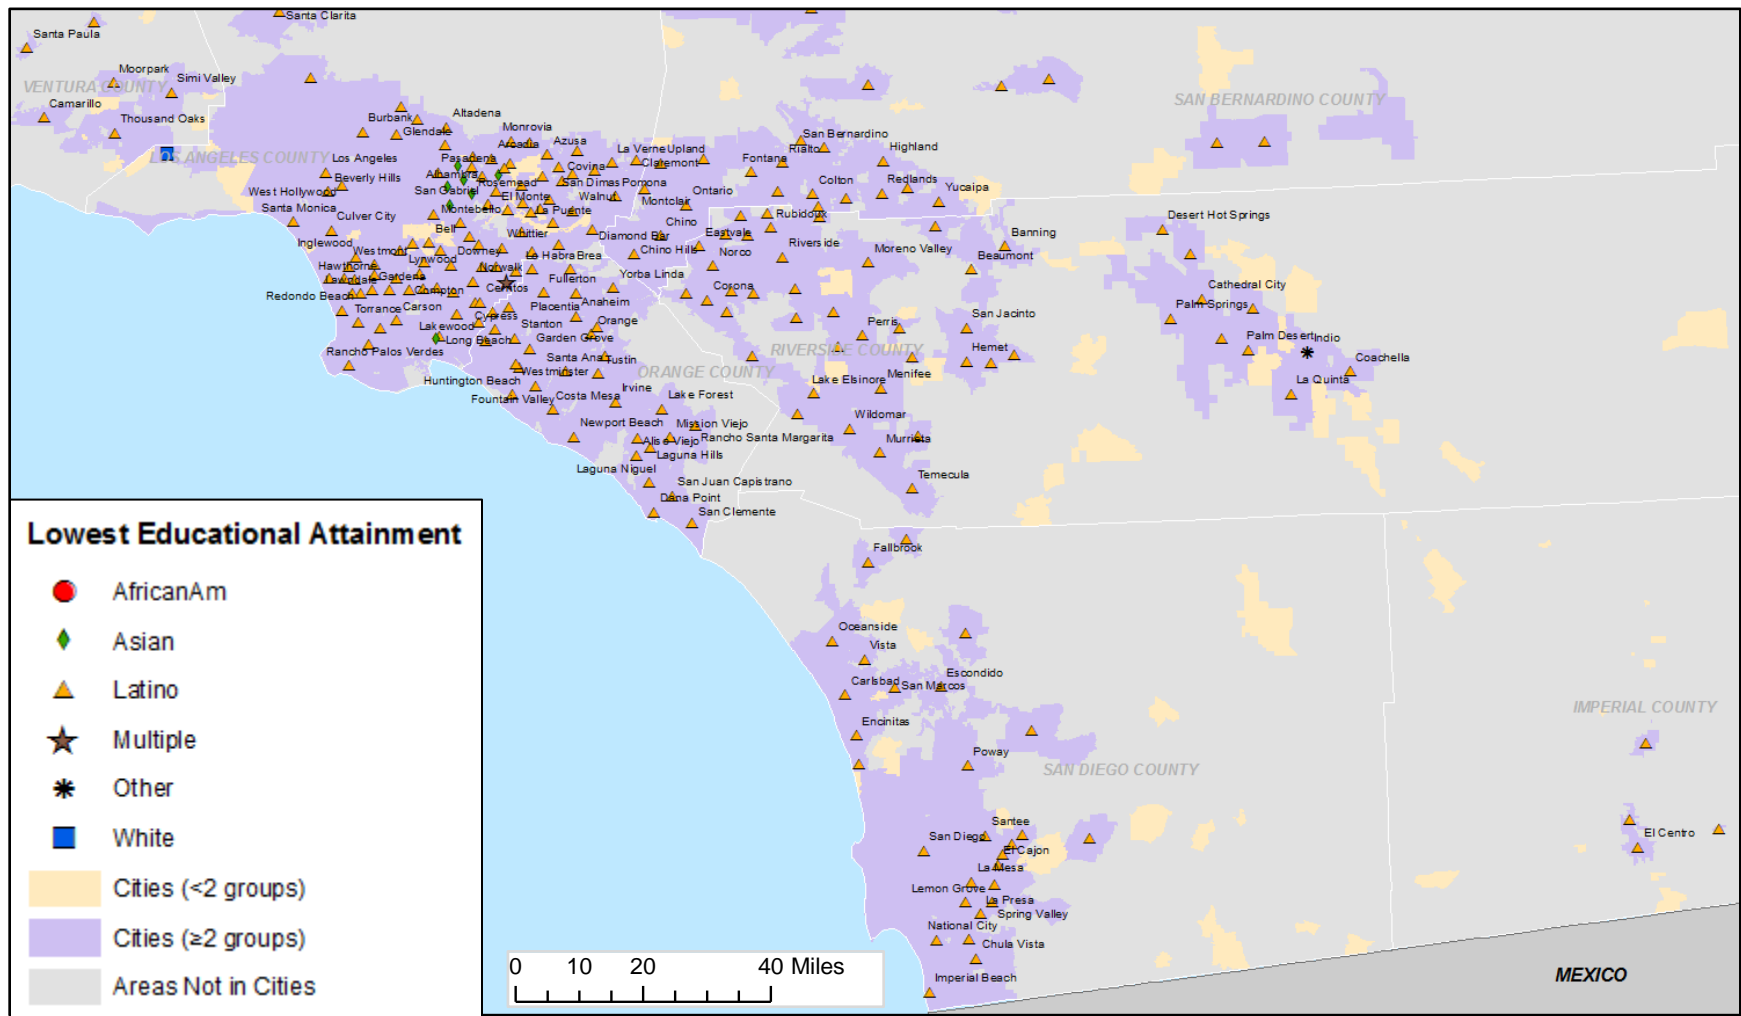

Figure 4.
